# Supplementary material for: Silver oxide(i) promoted Conia-ene/radical cyclization for a straightforward access to furan derivatives
Source: Royal Society of Chemistry journal article supplement (doi:10.1039/d1cc06379k), 2021-12-21

Supporting Information

**Silver oxide(I) promoted Conia-ene/radical cyclization for a straightforward access to furan derivatives**

**Bao Yu, Selkti Mohamed, Janick Ardisson, Marie-Isabelle Lannou\*, Geoffroy Sorin \***

**Abstract:** A novel access to fused furan cores using silver oxide(I) has been developed. Mechanistic investigations would indicate the involvement of a Conia-ene reaction/radical cyclization for an expedient path to complex furan derivatives. The reaction is broad in scope with interesting atom economy and can also be conducted in a one-pot fashion from readily accessible  $\alpha$ - $\beta$ -unsaturated ketones.

## Table of Contents

1. General information
2. Reaction optimization
3. Preparation of the cyclization precursors
4. Cyclized products
5.  $^1\text{H}$  and  $^{13}\text{C}$  NMR spectra
6. Single crystal X-Ray diffraction data

## 1. General Informations

All reactions sensitive to moisture and/or air were carried out under argon atmosphere in dry, freshly distilled solvents under anhydrous conditions using oven-dried glassware, unless otherwise noted. THF and toluene were distilled over sodium/benzophenone system, DCM, DMSO and DMF were distilled over calcium hydride, MeOH and EtOH were distilled over magnesium turnings. Reactions were monitored by TLC (silica gel 60 F254 plates) and visualization was accomplished with UV light (254 nm & 366 nm) and subsequent use of phosphomolybdic acid solution in EtOH (5%), KMnO<sub>4</sub> solution or vanillin/sulphuric acid solution in EtOH, followed by heating at 100-110 °C. Flash chromatography was performed with silica gel 60 (particle size 0.040-0.063 μm). Yield refers to chromatographically and spectroscopically pure compounds, unless otherwise noted. Optical rotations were recorded on a Jasco P-1010 digital polarimeter at 579 nm and reported as follows:  $[\alpha]_D^{20}$ , concentration (c in g/100 mL) in CHCl<sub>3</sub>. <sup>1</sup>H NMR spectra were recorded at 300 and 400 MHz. Chemical shifts are expressed in ppm, relative to the residual <sup>1</sup>H solvent signal (CDCl<sub>3</sub>: δ = 7.26 ppm) as the internal reference. Coupling constants (*J*) are reported in hertz (Hz). The following abbreviations are used to designate the multiplicities: s = singlet; d = doublet; t = triplet; q = quartet; quint. = quintet, sext. = sextet, sept. = septet, m = multiplet; br = broad. <sup>1</sup>H NMR assignments were confirmed by 2D COSY spectra. The given multiplicities reflect apparent signal patterns. Diastereomer ratio (*dr*) was estimated by <sup>1</sup>H NMR spectroscopic analysis (300, 400 and 600 MHz), unless otherwise noted. <sup>13</sup>C NMR spectra were recorded at 75 MHz and 100 MHz. Chemical shifts are given in ppm relative to the residual <sup>13</sup>C solvent signal (CDCl<sub>3</sub>: δ = 77.16 ppm, CD<sub>3</sub>OD: δ = 49.00 ppm). <sup>13</sup>C NMR assignments were confirmed by 2D HSQC and HMBC spectra. Coupling constants (*J*) are given in Hz for all NMR spectroscopic data. IR spectra were recorded with a FT-IR spectrometer. High-resolution mass spectra (HRMS) were measured on a mass spectrometer equipped with a TOF system and an electrospray ionization (ESI) ion source. Deuterated solvents were used as supplied.

## 2. Reaction Optimization

The optimization of the reaction conditions were performed on compound 1.

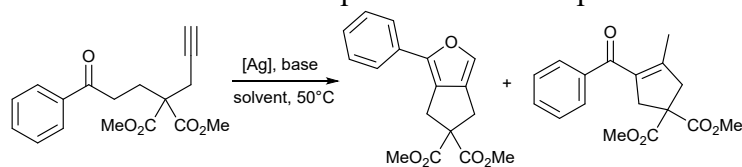

| Entry | [Ag]                                    | Base                           | Solvent                         | Time <sup>a</sup> | <sup>1</sup> H NMR yield <sup>b</sup> 2a / 3a |     |
|-------|-----------------------------------------|--------------------------------|---------------------------------|-------------------|-----------------------------------------------|-----|
|       |                                         |                                |                                 |                   | 2a                                            | 3a  |
| 1     | AgNO <sub>3</sub> 1 eq                  | DBU                            | CH <sub>3</sub> CN              | 24h <sup>b</sup>  | 24%                                           | 4%  |
| 2     | Ag <sub>2</sub> CO <sub>3</sub> 0.5 eq  | DBU                            | CH <sub>3</sub> CN              | 2h                | 53%                                           | 5%  |
| 3     | AgOTf 1 eq                              | DBU                            | CH <sub>3</sub> CN              | 2h                | 44%                                           | 4%  |
| 4     | AgNTf <sub>2</sub> 1 eq                 | DBU                            | CH <sub>3</sub> CN              | 2h                | 70%                                           | 7%  |
| 5     | AgSbF <sub>6</sub> 1 eq                 | DBU                            | CH <sub>3</sub> CN              | 4h                | 54%                                           | 3%  |
| 6     | Ag <sub>3</sub> PO <sub>4</sub> 0.33 eq | DBU                            | CH <sub>3</sub> CN              | 4h                | 47%                                           | 12% |
| 7     | Ag <sub>2</sub> O 0.5 eq                | DBU                            | CH <sub>3</sub> CN              | 2h                | 75%                                           | -   |
| 8     | Ag <sub>2</sub> O 0.5 eq                | K <sub>2</sub> CO <sub>3</sub> | CH <sub>3</sub> CN              | 24h <sup>c</sup>  | 40%                                           | 8%  |
| 9     | Ag <sub>2</sub> O 0.5 eq                | NEt <sub>3</sub>               | CH <sub>3</sub> CN              | 24h <sup>b</sup>  | 66%                                           | 3%  |
| 10    | Ag <sub>2</sub> O 0.5 eq                | Pyrrolidine                    | CH <sub>3</sub> CN              | 4h                | 73%                                           | 4%  |
| 11    | Ag <sub>2</sub> O 0.5 eq                | <i>i</i> Pr <sub>2</sub> NEt   | CH <sub>3</sub> CN              | 24h <sup>c</sup>  | 45%                                           | 5%  |
| 12    | Ag <sub>2</sub> O 0.5 eq                | DBU                            | DMF                             | 2h                | 62%                                           | 3%  |
| 13    | Ag <sub>2</sub> O 0.5 eq                | DBU                            | CH <sub>2</sub> Cl <sub>2</sub> | 24h <sup>c</sup>  | 14%                                           | 2%  |
| 14    | Ag <sub>2</sub> O 0.5 eq                | DBU                            | THF                             | 3h                | 66%                                           | 3%  |
| 15    | Ag <sub>2</sub> O 0.5 eq                | DBU                            | MeOH                            | 3h                | 20%                                           | 2%  |
| 16    | Ag <sub>2</sub> O 0.5 eq                | DBU                            | Toluene                         | 3h                | 54%                                           | 5%  |
| 17    | Ag <sub>2</sub> O 0.5 eq                | -                              | CH <sub>3</sub> CN              | 24h <sup>c</sup>  | 19%                                           | 2%  |
| 18    | -                                       | DBU                            | CH <sub>3</sub> CN              | 24h               | n.r                                           |     |

<sup>a</sup> The reaction was monitored by TLC. <sup>b</sup> <sup>1</sup>H NMR yield was determined from 1,3,5-trimethoxybenzene as internal standard. <sup>c</sup> Not complete after 24h.

## Catalytic Attempts

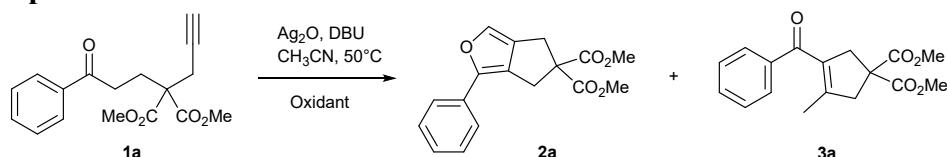

| Entry | Ag <sub>2</sub> O | Oxidant                                           | DBU    | Time             | <sup>1</sup> H NMR yield <sup>b</sup> 2a / 3a |     |
|-------|-------------------|---------------------------------------------------|--------|------------------|-----------------------------------------------|-----|
|       |                   |                                                   |        |                  | 2a                                            | 3a  |
| 1     | 0.5 eq            | -                                                 | 1 eq   | 2h               | 75% <sup>c</sup>                              | -   |
| 2     | 0.5 eq            | -                                                 | 0.5 eq | 2h               | 68%                                           | -   |
| 3     | 0.5 eq            | -                                                 | 0.2 eq | 2h               | 70%                                           | 3%  |
| 4     | 0.25 eq           | -                                                 | 0.2 eq | 24h <sup>a</sup> | 49%                                           | 3%  |
| 5     | 0.25 eq           | O <sub>2</sub>                                    | 0.2 eq | 18h              | 67%                                           | 3%  |
| 6     | 0.25 eq           | O <sub>2</sub>                                    | 1 eq   | 3h               | 56%                                           | 6%  |
| 7     | 0.25 eq           | CeO <sub>2</sub> 1 eq                             | 1 eq   | 8h               | 45%                                           | 13% |
| 8     | 0.25 eq           | K <sub>2</sub> S <sub>2</sub> O <sub>8</sub> 1 eq | 1 eq   | 4h               | 16%                                           | 25% |
| 9     | 0.25 eq           | PhI(OAc) <sub>2</sub> 1 eq                        | 1 eq   | 24h <sup>a</sup> | 44%                                           | 3%  |

<sup>a</sup> Not complete after 24h. <sup>b</sup> <sup>1</sup>H NMR yield was determined from internal standard 1,3,5-trimethoxybenzene. <sup>c</sup> The reaction has been performed twice more with a respectively 75% (at the 0.2 mmol scale) and 74% (at the 1 mmol scale) isolated yield.

### 3. Preparation of the cyclization precursors

#### dimethyl 2-(prop-2-yn-1-yl)malonate 14

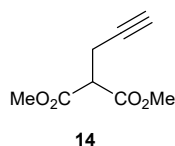

A flask containing powdered potassium carbonate (20.05 g, 145 mmol) was charged with dry acetone (125 mL) and dimethyl malonate (17.5 mL, 140 mmol). The suspension was warmed to reflux and propargyl bromide (80% in toluene, 6.25 mL, 56 mmol) was slowly added over 30 minutes. The mixture was stirred overnight at reflux. The reaction was cooled to room temperature and filtered over sand. The solution was concentrated under reduced pressure then purified by flash chromatography on silica gel (EtOAc/Cyclohexane : 5/95 to 10/90) to afford dimethyl 2-(prop-2-yn-1-yl)malonate as a colorless oil (m= 7.6 g, 80% yield).

All the spectroscopic data are in accordance with those described in the literature<sup>1</sup>.

#### dimethyl 2-(but-2-yn-1-yl)malonate 15

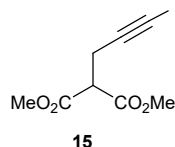

To a dry flask containing dimethyl malonate (9.0 mL, 78.9 mmol) and THF (245 mL) was slowly added NaH (60% w/w in mineral oil, 28.93 mmol) at 0 °C. 1-Bromo-2-butyne (2.3 mL, 26.3 mmol) was then slowly added then the solution was stirred for 30 min at 0 °C at which time a white precipitated formed. The mixture was then warmed to room temperature and stirred for 5h. The reaction was quenched by a saturated solution of NH<sub>4</sub>Cl and the aqueous layer was extracted twice by EtOAc. The combined organics extracts were washed with brine, dried over MgSO<sub>4</sub> and concentrated under reduced pressure. The crude mixture was purified by flash chromatography on silica gel (EtOAc/Cyclohexane : 5/95) affording the expected compound as a colorless oil (m= 3.5 g, 73% yield).

All the spectroscopic data are in accordance with those described in the literature<sup>2</sup>.

#### dimethyl 2-(3-phenylprop-2-yn-1-yl)malonate 16

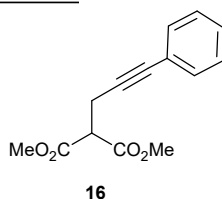

A flask containing powdered potassium carbonate (4 g, 29.3 mmol) was charged with dry acetone (25 mL) and dimethyl malonate (3.2 mL, 28.4 mmol). The suspension was warmed to reflux and (3-iodoprop-1-yn-1-yl)benzene (11.3 mmol) was slowly added over 30 minutes. The mixture was stirred overnight at reflux. The reaction was cooled to room temperature and filtered over sand. The solution was concentrated under vacuum then purified by flash chromatography on silica gel (EtOAc/Cyclohexane : 5/95) affording the expected product as yellow oil (m= 1.7 g, 62% yield).

<sup>1</sup> R. G. Iafe, J. L. Kuo, D. G. Hochstatter, T. Saga, J. W. Turner, C. A. Merlic. *Org. Lett.* 2013, **15**, 582-585.

<sup>2</sup> B. M. Trost, M. T. Rudd, *J. Am. Chem. Soc.*, 2005, **127**, 4763-4776.

All the spectroscopic data are in accordance with those described in the literature<sup>3</sup>.

but-3-yn-1-yl 4-methylbenzenesulfonate 17

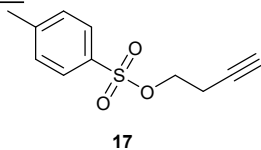

To a solution of but-3-yn-1-ol (701 mg, 10 mmol) in CH<sub>2</sub>Cl<sub>2</sub> (15 mL) were added NEt<sub>3</sub> (2.7 mL, 20 mmol) and TsCl (1.9 g, 10 mmol) at 0 °C. The solution was stirred for 18 h at r.t. and then quenched with sat. NH<sub>4</sub>Cl. The mixture was extracted with CH<sub>2</sub>Cl<sub>2</sub> (3x), the combined organic layers were neutralized with sat. NaHCO<sub>3</sub>, washed with brine, dried over MgSO<sub>4</sub> and concentrated under reduced pressure. The crude mixture was purified by flash chromatography on silica gel (EtOAc/Cyclohexane : 2/98 to 10/90) affording the expected compound as a colorless oil (m= 2.1 g, 90% yield).

All the spectroscopic data are in accordance with those described in the literature<sup>4</sup>.

dimethyl 2-(but-3-yn-1-yl)malonate 18

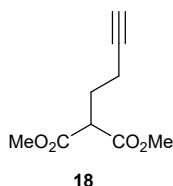

To a dry flask containing NaH (60% in mineral oil, 396 mg, 9.90 mmol) and anhydrous DMF (16 ml) was slowly added dimethylmalonate (3.56 g, 26.9 mmol) at 0 °C. The solution was stirred for 15 min at r.t. After this, but-3-yn-1-yl 4-methylbenzenesulfonate (2.01 g, 8.97 mmol) was added and the resulting mixture was stirred at 90 °C for 21 h. The reaction was quenched by water and the aqueous layer was extracted twice by Et<sub>2</sub>O. The combined organics extracts were washed with brine, dried over MgSO<sub>4</sub> and concentrated under reduced pressure. The crude mixture was purified by flash chromatography on silica gel (EtOAc/Cyclohexane : 5/95 to 10/90) affording the expected compound as a colorless oil (m= 1 g, 61% yield).

All the spectroscopic data are in accordance with those described in the literature<sup>5</sup>.

diethyl 2-allylmalonate 19

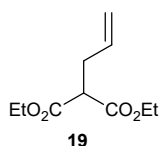

A flask containing powdered potassium carbonate (10.4 g, 75 mol) was charged with dry acetone (1.24 L) and diethyl malonate (5.7 mL, 37.5 mol). The suspension was warmed to reflux and allyl bromide (2.16 mL, 25 mol) was slowly added over 30 minutes. The mixture was stirred overnight at reflux. The reaction was cooled to room temperature and filtered over sand. The solution was concentrated under vacuum then purified by flash chromatography on silica gel (EtOAc/Cyclohexane : 5/95) affording the expected product as colorless oil (m= 4.1 g, 82% yield).

All the spectroscopic data are in accordance with those described in the literature.<sup>6</sup>

<sup>3</sup> R. Schiller, M. Pour, H. Fáková, J. Kuneš, I. Císařová, *J. Org. Chem.* 2004, **69**, 6761-6765.

<sup>4</sup> X.-J. Dai, O.D. Engl, T. León, S.L. Buchwald, *Angew. Chem.* 2019, **131**, 3445-3449.

<sup>5</sup> D. Gasperini, L. Maggi, S. Dupuy, R. M. Veenboer, D. B. Cordes, A. M. Slawin, S. P. Nolan, *Adv. Synth. Catal.* 2016, **358**, 3857-3862.

<sup>6</sup> J.-C. Su, Y.-T. Huang, C.-S. Chen, H.-C. Chiu, C.-W. Shiau, *Molecules*, 2018, **23**, 27.

### N-benzylprop-2-yn-1-amine 20

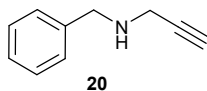

Propargyl bromide (4.3 mL, 38 mmol) was added to benzyl amine (25 mL, 228 mmol) over 30 min *via* addition funnel and allowed to stir overnight. The resulting mixture was diluted in Et<sub>2</sub>O and extracted with saturated aq. NaHCO<sub>3</sub> and dried over MgSO<sub>4</sub>. The reaction mixture was concentrated under reduced pressure then purified by flash chromatography on silica gel (EtOAc/Cyclohexane : 10/90 to 15/85) affording the expected product as pale yellow oil (m= 4.7 g, 85% yield).

All the spectroscopic data are in accordance with those described in the literature<sup>1</sup>.

### 4-methyl-N-(prop-2-yn-1-yl)benzenesulfonamide 21

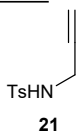

*p*-toluenesulfonyl chloride (4.8 g, 25 mmol) was added dropwise to a solution of propargylamine (1.9 mL, 30 mmol) and Et<sub>3</sub>N (4.7 mL, 35 mmol) in DCM (25 mL) at 0 °C under argon. Then the resulting mixture was warmed up to room temperature and stirred overnight. The reaction was quenched by H<sub>2</sub>O, extracted twice with DCM, dried over MgSO<sub>4</sub> and concentrated under reduced pressure. The residue was purified by flash chromatography on silica gel (EtOAc/Cyclohexane : 10/90) to afford the expected product as white solid (m= 5.1 g, 97% yield).

All the spectroscopic data are in accordance with those described in the literature<sup>7</sup>.

### General procedure for the synthesis of vinyl ketones (GPI and GPII) :

#### GPI

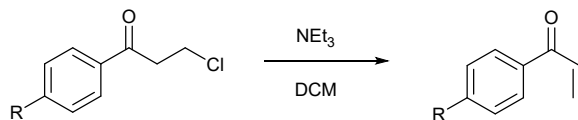

To a pre-stirred solution of 3-chloropropionyl aryl ketone (5.0 mmol, 1.0 eq.) in CH<sub>2</sub>Cl<sub>2</sub> (10 mL), triethylamine (10.0 mmol, 2 eq.) was added dropwise over 5 min under argon atmosphere. The reaction mixture was stirred for 18 h at room temperature followed by washing with 0.1 N HCl aq., distilled water, saturated NaHCO<sub>3</sub> aq., and brine. The organic layer was dried over MgSO<sub>4</sub>, and concentrated under reduced pressure. The residue was purified by flash chromatography on silica gel yielding the  $\alpha,\beta$ -unsaturated ketone.

#### GPII

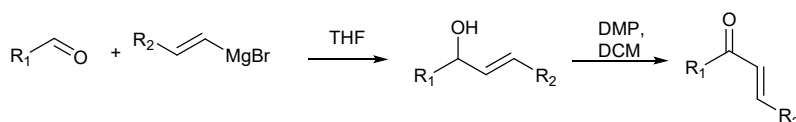

A solution of aldehyde (3 mmol, 1 eq.) in dry THF (5 mL) was cooled to 0 °C in an ice-water bath and Grignard reagent (3.6 mmol, 1.2 eq.) was added dropwise. The mixture was warmed to room temperature and stirred for overnight. Saturated NH<sub>4</sub>Cl solution (20 mL) was added to quench the reaction and the aqueous layer was extracted with EtOAc (3 × 15 mL). The combined organic layers were washed with brine (20 mL), dried over MgSO<sub>4</sub> and concentrated under reduced pressure. The residue was dissolved in

<sup>7</sup> Y. Kavanagh, C. M. Chaney, J. Muldoon, P. Evans, *J. Org. Chem.* 2008, **73**, 8601-8604.

$\text{CH}_2\text{Cl}_2$  (10 mL) and Dess-Martin periodinane (4.0 mmol, 1.3 eq.) was added. The mixture was stirred at room temperature until TLC showed complete disappearance of the starting alcohol. The solvent was removed under reduced pressure and the residue was purified by flash chromatography on silica gel affording the expected compound in a pure form.

### **General procedure for the synthesis of cyclization precursors (GPIII, GPV, GPV and GPVI) :**

#### **GPIII**

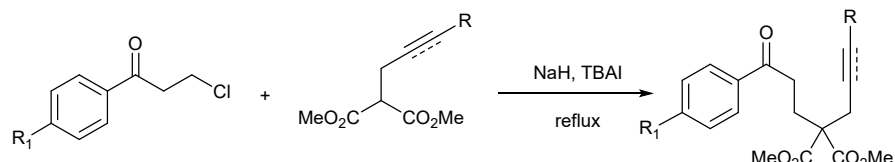

The alkyne or alkene (2.0 mmol, 1 eq.) was dissolved in THF (5 mL) and cooled to 0 °C. NaH (60% w/w in mineral oil, 2.6 mmol, 1.3 eq.) was added in one portion. The reaction mixture was stirred for 30 min at 0 °C. The 3-chloropropiophenone or derivatives (4.0 mmol, 2 eq.) was dissolved in THF (8 mL) and transferred slowly to the reaction mixture. Tetrabutylammonium iodide (0.2 mmol, 0.1 eq.) was added in one portion. The reaction was warmed to room temperature and then stirred at reflux overnight. The suspension was cooled to room temperature, quenched by a saturated solution of  $\text{NH}_4\text{Cl}$  and the aqueous layer was extracted twice by EtOAc. The combined organics extracts were washed with brine, dried over  $\text{MgSO}_4$  and concentrated under reduced pressure. The crude mixture was purified by flash chromatography on silica gel affording the expected compound in a pure form.

#### **GPV**

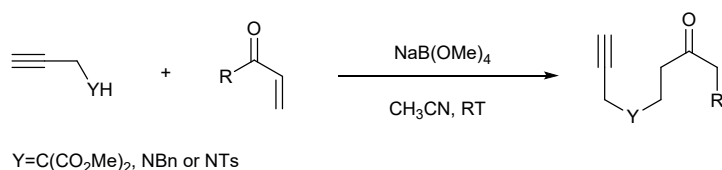

To a solution of Michael donor (1.2 mmol, 1.2 eq.) and  $\text{NaB}(\text{OMe})_4$  (0.2 mmol, 0.2 eq.) in  $\text{CH}_3\text{CN}$  (3 mL) was added  $\alpha$ - $\beta$ -unsaturated ketone (1.0 mmol, 1 eq.) at room temperature. The resulting solution was stirred at room temperature under air atmosphere and monitored by TLC. Upon completion, solvent was removed under reduced pressure, and the residue was purified by flash column chromatography on silica gel to give the desired product in a pure form.

#### **GPV**

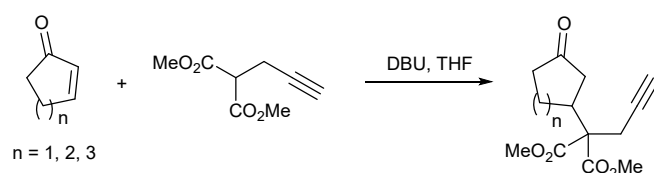

A solution of cyclic vinyl ketone (10 mmol, 1 eq.), dimethylpropargyl-malonate (13 mmol, 1.3 eq.) and DBU (13 mmol, 1.3 eq.) in THF (15 mL) was stirred for 24 h under argon at 50 °C. The solvent was removed under reduced pressure and the crude residue was purified by flash column chromatography on silica gel to give the desired product in a pure form.

#### **GPVI**

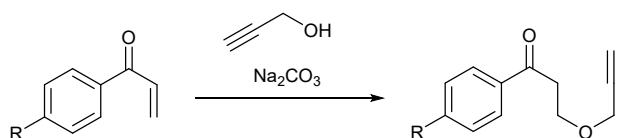



To a solution of activated alkene (0.5 mmol, 1 eq.) in propargyl alcohol (2.0 mmol, 4 eq.) was added Na<sub>2</sub>CO<sub>3</sub> (0.2 mL, 0.05M aq.), and the solution was stirred until alkene was completely consumed (monitored by TLC). The reaction mixture was extracted with ethyl acetate (3 × 5 mL) and the combined organic layers were washed with brine (10 mL), dried over MgSO<sub>4</sub>, filtered, and concentrated under reduced pressure. The crude product was purified by flash chromatography on silica gel to give the expected product in a pure form.

dimethyl 2-(3-oxo-3-phenylpropyl)-2-(prop-2-yn-1-yl)malonate **1a**

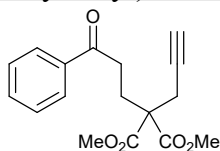

**1a**

The compound **1a** was obtained from 3-chloropropiophenone and compound **14** following the **GPIII** on 47 mmol scale (8 g). Purification by flash chromatography on silica gel (EtOAc/Cyclohexane: 10/90) afforded **1a** as a pale yellow solid (m= 10.9 g, 77% yield).

All the spectroscopic data are in accordance with those described in the literature<sup>8</sup>.

dimethyl 2-(but-2-yn-1-yl)-2-(3-oxo-3-phenylpropyl)malonate **1p**

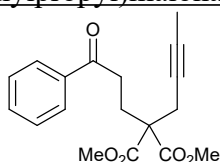

**1p**

The compound **1p** was obtained from 3-chloropropiophenone and compound **15** following the **GPIII** on 8.1 mmol scale (1.5 g). Purification by flash chromatography on silica gel (EtOAc/Cyclohexane: 5/95 to 8/92) afforded **1p** as a white solid (m= 1.0 g, 41% yield).

All the spectroscopic data are in accordance with those described in the literature<sup>9</sup>.

dimethyl 2-(3-oxo-3-phenylpropyl)-2-(3-phenylprop-2-yn-1-yl)malonate **1q**

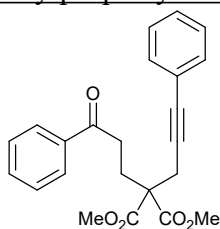

**1q**

The compound **1q** was obtained from 3-chloropropiophenone and compound **16** following the **GPIII** on 4.9 mmol scale (1.2 g). Purification by flash chromatography on silica gel (EtOAc/Cyclohexane: 5/95 to 8/92) afforded **1q** as a yellow solid (m= 1.3 g, 70% yield).

<sup>1</sup>H NMR (400 MHz, CDCl<sub>3</sub>) δ 7.98 – 7.95 (m, 2H), 7.55 – 7.51 (m, 1H), 7.44 - 7.39 (m, 2H), 7.36 – 7.34 (m, 2H), 7.28 -7.23 (m, 3H), 3.76 (s, 6H), 3.13 (s, 2H), 3.12 – 3.09 (m, 2H), 2.60 – 2.56 (m, 2H)

<sup>13</sup>C NMR (100 MHz, CDCl<sub>3</sub>) δ 198.8, 170.7 (2C), 136.7, 133.2, 131.8 (2C), 128.7 (2C), 128.3 (2C), 128.2 (4C), 123.1, 84.1, 56.8, 53.0 (2C), 34.0, 27.6, 25.0

<sup>8</sup> L. Huang, L. Ye, X. H., Li, Z. L. Li, J. S. Lin, X. Y. Liu, *Org. Lett.*, 2016, **18**, 5284-5287.

<sup>9</sup> J.-F. Brazeau, S. Zhang, I. Colomer, B. K. Corkey, F. D. Toste, *J. Am. Chem.Soc.* 2012, **134**, 2742–2749.

**FTIR (neat):**  $\nu = 2954, 2255, 1732, 1204, 906, 725, 690 \text{ cm}^{-1}$

**HRMS (ESI):**  $m/z$  calcd for  $\text{C}_{23}\text{H}_{22}\text{O}_5\text{Na}^+$ :  $[\text{M}+\text{Na}]^+$ : 401.1365; found: 401.1367

diethyl 2-allyl-2-(3-oxo-3-phenylpropyl)malonate **1r**

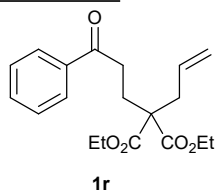

The compound **1r** was obtained from 3-chloropropiophenone and compound **19** following the **GPIII** on 7.5 mmol scale (1.5 g). Purification by flash chromatography (EtOAc/Cyclohexane: 3/97 to 4/96) afforded **1r** as a pale yellow solid ( $m = 1.1 \text{ g}$ , 45% yield).

All the spectroscopic data are in accordance with those described in the literature<sup>10</sup>.

dimethyl 2-(3-(4-chlorophenyl)-3-oxopropyl)-2-(prop-2-yn-1-yl)malonate **1b**

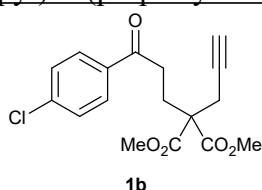

The compound **1b** was obtained from 3,4'-dichloropropiophenone and compound **14** following the **GPIII** on 2.9 mmol scale (500 mg). Purification by flash chromatography on silica gel (EtOAc/Cyclohexane: 5/95 to 10/90) afforded **1b** as a white solid ( $m = 781 \text{ mg}$ , 80% yield).

All the spectroscopic data are in accordance with those described in the literature<sup>5</sup>.

1-(naphthalen-2-yl)prop-2-en-1-one **22**

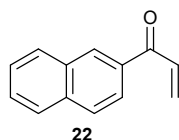

The compound **22** was obtained from 2-naphthaldehyde and vinylmagnesium bromide following the **GPII** on 20 mmol scale (3.2 g). Purification by flash chromatography on silica gel (EtOAc/Cyclohexane: 6/94) afforded **22** as a colorless oil ( $m = 3 \text{ g}$ , 84% yield over 2 steps).

All the spectroscopic data are in accordance with those described in the literature<sup>11</sup>.

dimethyl 2-(3-(naphthalen-2-yl)-3-oxopropyl)-2-(prop-2-yn-1-yl)malonate **1d**

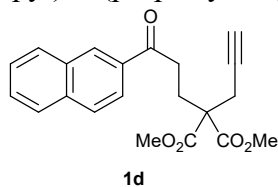

The compound **1d** was obtained from compound **22** and **14** following the **GPIV** on 10 mmol scale (1.8 g). Purification by flash chromatography on silica gel (EtOAc/Cyclohexane: 5/95) afforded **1d** as a pale yellow solid ( $m = 1.4 \text{ g}$ , 41% yield).

<sup>10</sup> L. Huang, S-C. Zheng, B. Tan, X-Y. Liu, *Org. Lett.* 2015, **17**, 1589–1592.

<sup>11</sup> S. H. Guo, S. Z., Xing, S. Mao, Y. R. Gao, W. L. Chen, Y. Q. Wang, *Tetrahedron Lett.*, 2014, **55**, 6718–6720.

**<sup>1</sup>H NMR (400 MHz, CDCl<sub>3</sub>)** δ 8.48 (s, 1H), 8.04 – 8.01 (m, 1H), 7.98 – 7.96 (m, 1H), 7.90 – 7.86 (m, 2H), 7.62 – 7.53 (m, 2H), 3.76 (s, 6H), 3.19 (t, *J* = 7.8 Hz, 2H), 2.95 (d, *J* = 2.8 Hz, 2H), 2.58 (t, *J* = 7.8 Hz, 2H), 2.07 (t, *J* = 2.8 Hz, 1H)

**<sup>13</sup>C NMR (100 MHz, CDCl<sub>3</sub>)** δ 198.7, 170.6 (2C), 135.8, 134.1, 132.6, 129.9, 129.7, 128.7, 128.6, 127.9, 126.9, 124.0, 78.7, 72.1, 56.4, 53.1 (2C), 33.9, 27.4, 24.2

**FTIR (neat):** ν = 3291, 2954, 1731, 1679, 1436, 1203, 1125, 909, 732 cm<sup>-1</sup>

**HRMS (ESI):** *m/z* calcd for C<sub>21</sub>H<sub>20</sub>O<sub>5</sub>Na<sup>+</sup>: [M+Na]<sup>+</sup>: 375.1208; found: 375.1208

1-(3,4-dimethoxyphenyl)prop-2-en-1-one **23**

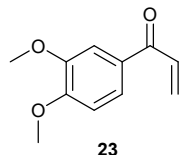

The compound **23** was obtained from 3,4-dimethoxybenzaldehyde and vinylmagnesium bromide following the **GPII** on 20 mmol scale (3.4 g). Purification by flash chromatography on silica gel (EtOAc/Cyclohexane: 10/90) afforded **23** as a pale yellow solid (m= 3.4 g, 90% yield over 2 steps).

All the spectroscopic data are in accordance with those described in the literature<sup>12</sup>.

dimethyl 2-(3-(3,4-dimethoxyphenyl)-3-oxopropyl)-2-(prop-2-yn-1-yl)malonate **1e**

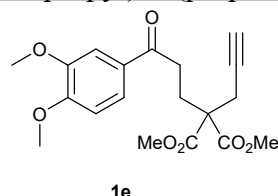

The compound **1e** was obtained from compound **23** and **14** following the **GPIV** on 10 mmol scale (1.9 g). Purification by flash chromatography on silica gel (EtOAc/Cyclohexane: 10/90 to 20/80) afforded **1e** as a yellow solid (m= 2.3 g, 64% yield).

**<sup>1</sup>H NMR (400 MHz, CDCl<sub>3</sub>)** δ 7.49 (d, *J* = 8.4 Hz, 1H), 7.41 (s, 1H), 6.78 (d, *J* = 8.4 Hz, 1H), 3.82 (d, *J* = 4.8 Hz, 6H), 3.64 (s, 6H), 2.89 (t, *J* = 7.8 Hz, 2H), 2.78 (d, *J* = 2.6 Hz, 2H), 2.38 (t, *J* = 7.8 Hz, 2H), 1.99 (t, *J* = 2.6 Hz, 1H)

**<sup>13</sup>C NMR (100 MHz, CDCl<sub>3</sub>)** δ 197.0, 170.2 (2C), 153.2, 148.9, 129.6, 122.6, 110.0, 109.9, 78.4, 71.8, 56.1, 55.9, 55.8, 52.7 (2C), 33.1, 27.4, 23.8

**FTIR (neat):** ν = 2256, 1733, 1515, 1265, 1023, 905, 724 cm<sup>-1</sup>

**HRMS (ESI):** *m/z* calcd for C<sub>19</sub>H<sub>22</sub>O<sub>7</sub>Na<sup>+</sup>: [M+Na]<sup>+</sup>: 385.1263; found: 385.1260

dimethyl 2-(3-oxo-1,3-diphenylpropyl)-2-(prop-2-yn-1-yl)malonate **1g**

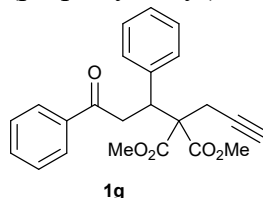

The compound **1g** was obtained from chalcone and compound **14** following the **GPIV** on 10 mmol scale (2.1 g). Purification by flash chromatography on silica gel (EtOAc/Cyclohexane: 10/90 to 20/80) afforded **1g** as a white solid (m= 710 mg, 18% yield).

<sup>12</sup> S. F. Musolino, O. S. Ojo, N. J. Westwood, J. E. Taylor, A. D. Smith, *Chem. Eur. J.*, 2016, **22**, 18916-18922.

**<sup>1</sup>H NMR (400 MHz, CDCl<sub>3</sub>)**  $\delta$  7.94 – 7.91 (m, 2H), 7.53 – 7.49 (m, 1H), 7.43 – 7.39 (m, 2H), 7.26 – 7.19 (m, 5H), 4.43 (dd,  $J$  = 10.6, 2.8 Hz, 1H), 3.84 (d,  $J$  = 2.8 Hz, 1H), 3.82 (s, 3H), 3.79 (d,  $J$  = 10.6 Hz, 1H), 3.75 (s, 3H), 2.77 (dd,  $J$  = 17.2, 2.8 Hz, 1H), 2.52 (dd,  $J$  = 17.2, 2.8 Hz, 1H), 2.18 (t,  $J$  = 2.8 Hz, 1H)  
**<sup>13</sup>C NMR (100 MHz, CDCl<sub>3</sub>)**  $\delta$  197.7, 170.1, 170.0, 138.6, 137.1, 133.0, 129.0 (2C), 128.5 (2C), 128.4 (2C), 128.1 (2C), 127.7, 79.3, 72.5, 61.0, 52.9, 52.7, 43.6, 41.5, 24.3

**FTIR (neat):**  $\nu$  = 3308, 2251, 1734, 1214, 905, 725 cm<sup>-1</sup>

**HRMS (ESI):**  $m/z$  calcd for C<sub>23</sub>H<sub>23</sub>O<sub>5</sub>: [M+H]<sup>+</sup>: 379.1545; found: 379.1542

#### 1-(4-fluorophenyl)prop-2-en-1-one **24**

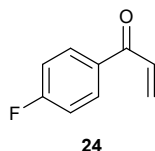

The compound **24** was obtained from 3-chloro-4'-fluoropropiophenone following the **GPI** on 16 mmol scale (3 g). Purification by flash chromatography on silica gel (EtOAc/Cyclohexane: 10/90) afforded **24** as a colorless oil ( $m$  = 2.3 g, 96% yield).

All the spectroscopic data are in accordance with those described in the literature<sup>13</sup>.

#### dimethyl 2-(3-(4-fluorophenyl)-3-oxopropyl)-2-(prop-2-yn-1-yl)malonate **1c**

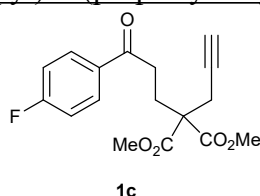

The compound **1c** was obtained from compound **24** and **14** following the **GPIV** on 10 mmol scale (1.5 g). Purification by flash chromatography on silica gel (EtOAc/Cyclohexane: 10/90) afforded **1c** as a white solid ( $m$  = 2.6 g, 81% yield).

**<sup>1</sup>H NMR (300 MHz, CDCl<sub>3</sub>)**  $\delta$  8.01 – 7.94 (m, 2H), 7.14 – 7.08 (m, 2H), 3.73 (s, 6H), 3.02 (t,  $J$  = 7.7 Hz, 2H), 2.88 (d,  $J$  = 2.7 Hz, 2H), 2.48 (t,  $J$  = 7.7 Hz, 2H), 2.04 (t,  $J$  = 2.7 Hz, 1H)

**<sup>13</sup>C NMR (100 MHz, CDCl<sub>3</sub>)**  $\delta$  197.1, 170.5 (2C), 165.8 (d,  $J$  = 253 Hz), 133.1 (d,  $J$  = 3 Hz), 130.8 (d,  $J$  = 9 Hz, 2C), 115.7 (d,  $J$  = 21 Hz, 2C), 78.6, 72.0, 56.3, 52.9 (2C), 33.7, 27.3, 24.1

**<sup>19</sup>F NMR (280 MHz, CDCl<sub>3</sub>)**  $\delta$  -105.15

**FTIR (neat):**  $\nu$  = 3308, 2257, 1733, 1686, 1599, 1206, 1157, 906, 726 cm<sup>-1</sup>

**HRMS (ESI):**  $m/z$  calcd for C<sub>17</sub>H<sub>18</sub>O<sub>5</sub>F: [M+H]<sup>+</sup>: 321.1138; found: 321.1137

#### dimethyl 2-(3-oxobutyl)-2-(prop-2-yn-1-yl)malonate **4c**

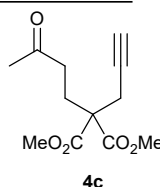

The compound **4c** was obtained from methyl vinyl ketone and compound **14** following the **GPIV** on 10 mmol scale (0.7 g). Purification by flash chromatography on silica gel (EtOAc/Cyclohexane: 10/90 to 15/85) afforded **4c** as a white solid ( $m$  = 1.8 g, 75% yield).

All the spectroscopic data are in accordance with those described in the literature<sup>14</sup>.

<sup>13</sup> G. Zhang, F. Jia, L. J. Gooßen, *Chem. Eur. J.*, 2018, **24**, 4537-4541.

<sup>14</sup> J. Muñoz-Bascón, C. Hernández-Cervantes, N. M. Padial, M. Álvarez-Corral, A. Rosales, I. Rodríguez-García, J. E. Oltra,

### (E)-1-phenylhex-4-en-3-one 25

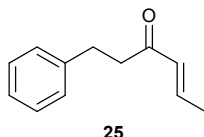

The compound **25** was obtained from 3-phenylpropionaldehyde and (*E*)-1-propenylmagnesium bromide following the **GPII** on 6 mmol scale (0.8 g). Purification by flash chromatography on silica gel (EtOAc/Cyclohexane: 10/90 to 15/85) afforded **25** as a colorless oil (m= 966 mg, 92% yield over 2 steps).

All the spectroscopic data are in accordance with those described in the literature<sup>15</sup>.

### dimethyl 2-(4-oxo-6-phenylhexan-2-yl)-2-(prop-2-yn-1-yl)malonate 4a

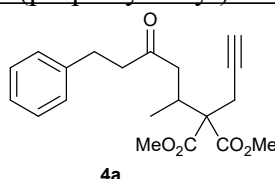

The compound **4a** was obtained from compound **25** and **14** following the **GPIV** on 2.3 mmol scale (401 mg). Purification by flash chromatography on silica gel (EtOAc/Cyclohexane: 10/90 to 15/85) afforded **4a** as a yellow solid (m= 142 mg, 18% yield).

**<sup>1</sup>H NMR (400 MHz, CDCl<sub>3</sub>)**  $\delta$  7.29 - 7.25 (m, 2H), 7.20 – 7.16 (m, 3H), 3.73 (s, 6H), 3.04 – 2.96 (m, 1H), 2.94 – 2.83 (m, 4H), 2.82 – 2.66 (m, 3H), 2.23 (dd, *J* = 16.8, 10.4 Hz, 1H), 2.03 (t, *J* = 2.8 Hz, 1H), 0.89 (d, *J* = 6.8 Hz, 3H)

**<sup>13</sup>C NMR (100 MHz, CDCl<sub>3</sub>)**  $\delta$  208.4, 170.3, 170.0, 141.1, 128.6 (2C), 128.4 (2C), 126.2, 79.1, 71.8, 60.3, 52.8, 52.6, 46.7, 44.5, 31.9, 29.9, 23.04, 15.7

**FTIR (neat):**  $\nu$  = 2954, 1730, 1435, 1202, 1049, 908, 728, 700 cm<sup>-1</sup>

**HRMS (ESI):** *m/z* calcd for C<sub>20</sub>H<sub>25</sub>O<sub>5</sub>: [M+H]<sup>+</sup>: 345.1702; found: 345.1699

### 5-phenylpent-1-en-3-one 26

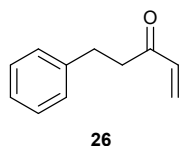

The compound **26** was obtained from 3-phenylpropionaldehyde and vinylmagnesium bromide following the **GPII** on 14.9 mmol scale (2 g). Purification by flash chromatography on silica gel (EtOAc/Cyclohexane: 20/80) afforded **26** as a yellow oil (m= 2.2 g, 94% yield over 2 steps).

All the spectroscopic data are in accordance with those described in the literature<sup>16</sup>.

### dimethyl 2-(3-oxo-5-phenylpentyl)-2-(prop-2-yn-1-yl)malonate 4b

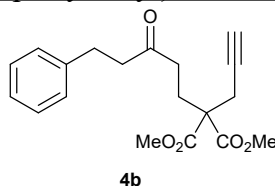

---

*Chem. Eur. J.* 2014, **20**, 801-810.

<sup>15</sup> Y. Sugawara, W. Yamada, S. Yoshida, T. Ikeno, T. Yamada, *J. Am. Chem. Soc.* 2007, **129**, 12902-12903.

<sup>16</sup> G. A., Molander, L. Jean-Gérard, *J. Org. Chem.*, 2009, **74**, 1297-1303.

The compound **4b** was obtained from compound **26** and **14** following the **GPIV** on 2.2 mmol scale (350 mg). Purification by flash chromatography on silica gel (EtOAc/Cyclohexane: 5/95) afforded **4b** as a white solid (m= 405 mg, 56% yield).

**<sup>1</sup>H NMR (400 MHz, CDCl<sub>3</sub>)** δ 7.29 – 7.25 (m, 2H), 7.20-7.16 (m, 3H), 3.71 (s, 6H), 2.89 (t, *J* = 7.6 Hz, 2H), 2.79 (d, *J* = 2.7 Hz, 2H), 2.73 (t, *J* = 7.6 Hz, 2H), 2.44 (t, *J* = 8.0 Hz, 2H), 2.32 (t, *J* = 8.0 Hz, 2H), 2.02 (t, *J* = 2.7 Hz, 1H)

**<sup>13</sup>C NMR (100 MHz, CDCl<sub>3</sub>)** δ 208.3, 170.5 (2C), 141.0, 128.6 (2C), 128.4 (2C), 126.2, 78.5, 71.9, 56.1, 52.9 (2C), 44.3, 37.9, 29.8, 26.5, 23.9

**FTIR (neat):** ν = 3308, 2254, 1733, 1204, 905, 725 cm<sup>-1</sup>

**HRMS (ESI):** *m/z* calcd for C<sub>19</sub>H<sub>23</sub>O<sub>5</sub>: [M+H]<sup>+</sup>: 331.1545; found: 331.1540

(S)-5,9-dimethyldeca-1,8-dien-3-one **27**

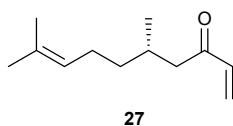

The compound **27** was obtained from (*S*)-(-)-citronellal and vinylmagnesium bromide following the **GPII** on 13.3 mmol scale (2.1 g). Purification by flash chromatography on silica gel (EtOAc/Cyclohexane: 5/95) afforded **27** as a pale yellow oil (m= 2.2 g, 90% yield for 2 steps).

All the spectroscopic data are in accordance with those described in the literature<sup>17</sup>.

dimethyl (S)-2-(5,9-dimethyl-3-oxodec-8-en-1-yl)-2-(prop-2-yn-1-yl)malonate **4e**

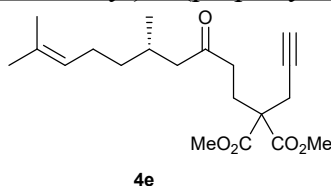

The compound **4e** was obtained from compound **27** and **14** following the **GPIV** on 1.7 mmol scale (300 mg). Purification by flash chromatography on silica gel (EtOAc/Cyclohexane: 10/90) afforded **4e** as a colorless oil (m= 367 mg, 63% yield).

**<sup>1</sup>H NMR (400 MHz, CDCl<sub>3</sub>)** δ 5.09 – 5.06 (m, 1H), 3.74 (s, 6H), 2.81 (d, *J* = 2.8 Hz, 2H), 2.46 – 2.41 (m, 2H), 2.38 – 2.30 (m, 3H), 2.21 (dd, *J* = 16.0, 8.0 Hz, 1H), 2.02 (t, *J* = 2.6 Hz, 1H), 2.00 – 1.90 (m, 3H), 1.68 (s, 3H), 1.59 (s, 3H), 1.34 – 1.25 (m, 1H), 1.22 – 1.13 (m, 1H), 0.89 (d, *J* = 6.8 Hz, 3H)

**<sup>13</sup>C NMR (100 MHz, CDCl<sub>3</sub>)** δ 209.2, 170.5 (2C), 131.6, 124.4, 78.6, 71.9, 56.2, 53.0 (2C), 50.3, 38.2, 37.1, 29.1, 26.5, 25.8, 25.6, 23.9, 19.8, 17.8

**FTIR (neat):** ν = 3310, 2956, 2256, 1734, 1437, 1205, 906, 727 cm<sup>-1</sup>

**HRMS (ESI):** *m/z* calcd for C<sub>20</sub>H<sub>30</sub>O<sub>5</sub>Na<sup>+</sup>: [M+Na]<sup>+</sup>: 373.1991; found: 373.1990

**[α]<sub>D</sub><sup>25</sup>** = -1.8 (c = 0.5, CHCl<sub>3</sub>)

(+/-)-3-ethyl 4,4-dimethyl 1-oxo-1-phenylhept-6-yne-3,4,4-tricarboxylate **1h**

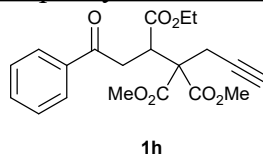

<sup>17</sup> H., Hagiwara, T., Okabe, H., Ono, V. P., Kamat, T., Hoshi, T., Suzuki, M. Ando, *J. Chem. Soc., Perkin Trans. 1*, 2002, 895-900.

The compound **1h** was obtained from ethyl 3-benzoylacrylate and compound **14** following the **GPIV** on 2.45 mmol scale (500 mg). Purification by flash chromatography on silica gel (EtOAc/Cyclohexane: 20/80) afforded **1h** as a yellow solid (m= 830 mg, 91% yield).

**<sup>1</sup>H NMR (300 MHz, CDCl<sub>3</sub>)** δ 7.98 – 7.95 (m, 2H), 7.54 – 7.59 (m, 1H), 7.48 – 7.43 (m, 2H), 4.12 (q, *J* = 7.2 Hz, 2H), 4.06 (dd, *J* = 10.6, 3.0 Hz, 1H), 3.79 (s, 3H), 3.78 (s, 3H), 3.77 (dd, *J* = 18.0, 10.6 Hz, 1H), 3.53 (dd, *J* = 18.0, 3.0 Hz, 1H), 3.04 (dd, *J* = 17.4, 2.7 Hz, 1H), 2.91 (dd, *J* = 17.4, 2.7 Hz, 1H), 2.12 (t, *J* = 2.7 Hz, 1H), 1.21 (t, *J* = 7.2 Hz, 3H)

**<sup>13</sup>C NMR (100 MHz, CDCl<sub>3</sub>)** δ 197.8, 171.9, 169.5, 169.2, 136.6, 133.3, 128.7 (2C), 128.2 (2C), 79.5, 72.1, 61.5, 58.5, 53.2, 53.1, 44.5, 37.9, 23.2, 14.1

**FTIR (neat):** ν = 2955, 1734, 1689, 1436, 1207, 1027, 908, 730, 690 cm<sup>-1</sup>

**HRMS (ESI):** *m/z* calcd for C<sub>20</sub>H<sub>23</sub>O<sub>7</sub>: [M+H]<sup>+</sup>: 375.1444; found: 375.1441

#### dimethyl 2-(3-oxocyclopentyl)-2-(prop-2-yn-1-yl)malonate **6a**

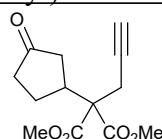

**6a**

The compound **6a** was obtained from 2-cyclopentenone following the **GPV** on 5.9 mmol scale (482 mg). Purification by flash chromatography on silica gel (EtOAc/Cyclohexane: 30/70 to 50/50) afforded **6a** as a white solid (m= 900 mg, 61% yield).

All the spectroscopic data are in accordance with those described in the literature<sup>18</sup>.

#### dimethyl 2-(3-oxocyclohexyl)-2-(prop-2-yn-1-yl)malonate **6b**

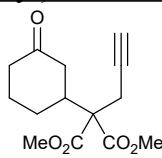

**6b**

The compound **6b** was obtained from 2-cyclohexen-1-one following the **GPV** on 5.9 mmol scale (564 mg). Purification by flash chromatography on silica gel (EtOAc/Cyclohexane: 30/70 to 50/50) afforded **6b** as a colorless oil (m= 1.35 g, 86% yield).

All the spectroscopic data are in accordance with those described in the literature<sup>14</sup>.

#### dimethyl 2-(3-oxocycloheptyl)-2-(prop-2-yn-1-yl)malonate **6c**

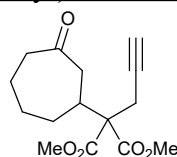

**6c**

The compound **6c** was obtained from cyclohept-2-en-1-one following the **GPV** on 3.8 mmol scale (419 mg). Purification by flash chromatography on silica gel (EtOAc/Cyclohexane: 20/80 to 30/70) afforded **6c** as a yellow oil (m= 959 mg, 90% yield).

All the spectroscopic data are in accordance with those described in the literature<sup>19</sup>.

<sup>18</sup> F., Beaufils, F., Dénès, P. Renaud, *Angew. Chem. Int. Ed.*, 2005, **44**, 5273-5275.

<sup>19</sup> F., Beaufils, F., Dénès, B., Becattini, P., Renaud, K. Schenk, *Adv. Synth. Cat.*, 2005, **347**, 1587-1594.

### 1-cyclohexylprop-2-en-1-one 28

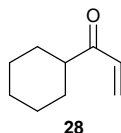

The compound **28** was obtained from cyclohexanecarboxaldehyde and vinylmagnesium bromide following the **GPII** on 20 mmol scale (2.2 g). Purification by flash chromatography on silica gel (EtOAc/Cyclohexane: 5/95) afforded **28** as a yellow oil (m= 2.4 g, 88% yield for 2 steps).

All the spectroscopic data are in accordance with those described in the literature<sup>20</sup>.

### dimethyl 2-(3-cyclohexyl-3-oxopropyl)-2-(prop-2-yn-1-yl)malonate 4d

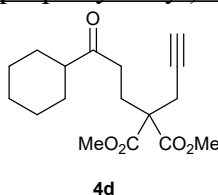

The compound **4d** was obtained from compound **28** and **14** following the **GPIV** on 10 mmol scale (1.38 g). Purification by flash chromatography on silica gel (EtOAc/Cyclohexane: 10/90) afforded **4d** as a white solid (m= 2.3 g, 75% yield).

**<sup>1</sup>H NMR (400 MHz, CDCl<sub>3</sub>)**  $\delta$  3.71 (s, 6H), 2.78 (d,  $J$  = 2.6 Hz, 2H), 2.50 – 2.45 (m, 2H), 2.33 – 2.26 (m, 3H), 2.01 (t,  $J$  = 2.6 Hz, 1H), 1.82 – 1.72 (m, 4H), 1.66 – 1.61 (m, 1H), 1.34 – 1.14 (m, 5H)

**<sup>13</sup>C NMR (100 MHz, CDCl<sub>3</sub>)**  $\delta$  212.3, 170.5 (2C), 78.5, 71.8, 56.2, 52.9 (2C), 50.8, 35.4, 28.6 (2C), 26.5, 25.9, 25.7 (2C), 23.9

**FTIR (neat):**  $\nu$  = 2931, 1732, 1437, 1200, 910, 729 cm<sup>-1</sup>

**HRMS (ESI):**  $m/z$  calcd for C<sub>17</sub>H<sub>25</sub>O<sub>5</sub>: [M+H]<sup>+</sup>: 309.1702; found: 309.1702

### 1-(4-chlorophenyl)prop-2-en-1-one 29

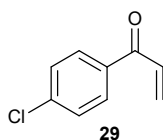

The compound **29** was obtained from 3,4'-dichloropropiophenone following the **GPI** on 14.8 mmol scale (3 g). Purification by flash chromatography (EtOAc/Cyclohexane: 10/90) afforded **29** as a colorless oil (m= 2.4 g, 96% yield).

All the spectroscopic data are in accordance with those described in the literature<sup>8</sup>.

### 1-(4-chlorophenyl)-3-(prop-2-yn-1-yloxy)propan-1-one 1o

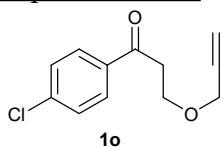

The compound **1o** was obtained from compound **29** following the **GPVI** on 7.4 mmol scale (1.2 g). Purification by flash chromatography on silica gel (EtOAc/Cyclohexane: 5/95) afforded **1o** as a white solid (m= 1.2 g, 74% yield).

<sup>20</sup> S., Feuillastre, B., Pelotier, O. Piva, *Eur. J. Org. Chem.*, 2014, 1753-1759.



All the spectroscopic data are in accordance with those described in the literature<sup>5</sup>.

### 1-phenylprop-2-en-1-one **30**

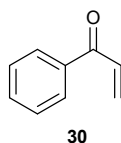

The compound **30** was obtained from 3-chloropropiophenone following the **GPI** on 20 mmol scale (3.4 g). Purification by flash chromatography on silica gel (EtOAc/Cyclohexane: 5/95 to 10/90) afforded **30** as a yellow oil (m= 2.5 g, 95% yield).

All the spectroscopic data are in accordance with those described in the literature<sup>17</sup>.

### 3-(benzyl(prop-2-yn-1-yl)amino)-1-phenylpropan-1-one **1k**

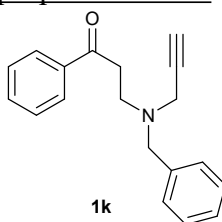

The compound **1k** was obtained from compound **30** and **20** following the **GPIV** on 17.8 mmol scale (2.3 g). Purification by flash chromatography on silica gel (EtOAc/Cyclohexane: 5/95) afforded **1k** as a colorless oil (m= 3.4 g, 84% yield).

**<sup>1</sup>H NMR (400 MHz, CDCl<sub>3</sub>)**  $\delta$  8.00 – 7.97 (m, 2H), 7.60 – 5.55 (m, 1H), 7.49 – 7.45 (m, 2H), 7.37 – 7.25 (m, 5H), 3.74 (s, 2H), 3.41 (d,  $J$  = 2.4 Hz, 2H), 3.21 (t,  $J$  = 7.2 Hz, 2H), 3.10 (t,  $J$  = 7.2 Hz, 2H), 2.32 (t,  $J$  = 2.4 Hz, 1H)

**<sup>13</sup>C NMR (100 MHz, CDCl<sub>3</sub>)**  $\delta$  199.0, 138.4, 136.9, 132.9, 128.9 (2C), 128.5 (2C), 128.2 (2C), 128.0 (2C), 127.1, 78.3, 73.5, 58.0, 48.8, 41.6, 37.2

**FTIR (neat):**  $\nu$  = 3295, 1682, 1448, 1212, 1120, 909, 735, 689 cm<sup>-1</sup>

**HRMS (ESI):**  $m/z$  calcd for C<sub>19</sub>H<sub>20</sub>NO: [M+H]<sup>+</sup>: 278.1545; found: 278.1544

### 4-(benzyl(prop-2-yn-1-yl)amino)butan-2-one **4g**

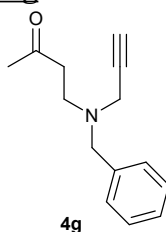

The compound **4g** was obtained from methyl vinyl ketone and compound **20** following the **GPIV** on 2.1 mmol scale (145 mg). Purification by flash chromatography on silica gel (EtOAc/Cyclohexane: 7/93 to 10/90) afforded **4g** as a colorless oil (m= 365 mg, 82% yield).

**<sup>1</sup>H NMR (400 MHz, CDCl<sub>3</sub>)**  $\delta$  7.32 – 7.21 (m, 5H), 3.62 (s, 2H), 3.29 (d,  $J$  = 2.4 Hz, 2H), 2.88 (t,  $J$  = 7.2 Hz, 2H), 2.60 (t,  $J$  = 7.2 Hz, 2H), 2.24 (t,  $J$  = 2.4 Hz, 1H), 2.12 (s, 3H)

**<sup>13</sup>C NMR (100 MHz, CDCl<sub>3</sub>)**  $\delta$  207.8, 138.3, 129.0 (2C), 128.3 (2C), 127.2, 78.1, 73.5, 57.8, 48.2, 42.1, 41.3, 29.8

**FTIR (neat):**  $\nu$  = 3287, 2834, 1710, 1454, 1358, 1123, 1028, 738, 699 cm<sup>-1</sup>

**HRMS (ESI):**  $m/z$  calcd for C<sub>14</sub>H<sub>18</sub>NO: [M+H]<sup>+</sup>: 216.1388; found: 216.1386

### 3-(benzyl(prop-2-yn-1-yl)amino)-1-(4-chlorophenyl)propan-1-one **1l**

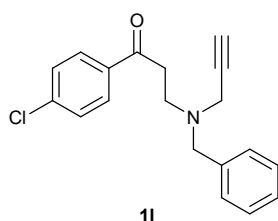

The compound **1l** was obtained from compound **29** and **20** following the **GPIV** on 2.7 mmol scale (458 mg). Purification by flash chromatography on silica gel (EtOAc/Cyclohexane: 5/95) afforded **1l** as a colorless oil (m= 729 mg, 85% yield).

**<sup>1</sup>H NMR (400 MHz, CDCl<sub>3</sub>)**  $\delta$  7.85 (d,  $J$  = 8.8 Hz, 2H), 7.39 (d,  $J$  = 8.8 Hz, 2H), 7.30 – 7.24 (m, 5H), 3.69 (s, 2H), 3.38 (d,  $J$  = 2.4 Hz, 2H), 3.13 (t,  $J$  = 7.2 Hz, 2H), 3.04 (t,  $J$  = 7.2 Hz, 2H), 2.29 (t,  $J$  = 2.4 Hz, 1H)

**<sup>13</sup>C NMR (100 MHz, CDCl<sub>3</sub>)**  $\delta$  197.8, 139.3, 138.3, 135.2, 129.4 (2C), 129.0 (2C), 128.8 (2C), 128.3 (2C), 127.2, 78.3, 73.6, 58.0, 48.6, 41.7, 37.2

**FTIR (neat):**  $\nu$  = 3302, 1683, 1588, 1400, 1092, 906, 729, 698 cm<sup>-1</sup>

**HRMS (ESI):**  $m/z$  calcd for C<sub>19</sub>H<sub>19</sub>NOCl: [M+H]<sup>+</sup>: 312.1155; found: 312.1154

(+/-)-ethyl 2-(benzyl(prop-2-yn-1-yl)amino)-4-oxo-4-phenylbutanoate **1m**

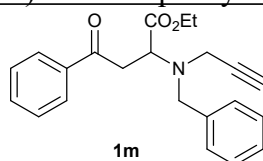

The compound **1m** was obtained from ethyl 3-benzoylacrylate and compound **20** following the **GPIV** on 2.4 mmol scale (500 mg). Purification by flash chromatography on silica gel (EtOAc/Cyclohexane: 3/97) afforded **1m** as a pale yellow solid (m= 663 mg, 79% yield).

**<sup>1</sup>H NMR (400 MHz, CDCl<sub>3</sub>)**  $\delta$  7.96 – 7.94 (m, 2H), 7.58 – 7.54 (m, 1H), 7.48 – 7.43 (m, 2H), 7.36 – 7.22 (m, 5H), 4.30 (dd,  $J$  = 9.4, 4.8 Hz, 1H), 4.23 (q,  $J$  = 7.2 Hz, 2H), 4.02 (d,  $J$  = 13.6 Hz, 1H), 3.80 (d,  $J$  = 13.6 Hz, 1H), 3.70 (dd,  $J$  = 17.2, 9.4 Hz, 1H), 3.47 (d,  $J$  = 2.4 Hz, 2H), 3.33 (dd,  $J$  = 17.2, 4.8 Hz, 1H), 2.22 (t,  $J$  = 2.4 Hz, 1H), 1.33 (t,  $J$  = 7.2 Hz, 3H)

**<sup>13</sup>C NMR (100 MHz, CDCl<sub>3</sub>)**  $\delta$  197.8, 171.7, 138.5, 136.8, 133.3, 128.9 (2C), 128.7 (2C), 128.5 (2C), 128.2 (2C), 127.4, 80.2, 73.0, 60.9, 60.2, 54.8, 40.4, 39.1, 14.4

**FTIR (neat):**  $\nu$  = 1724, 1683, 1449, 1207, 1174, 907, 735, 689 cm<sup>-1</sup>

**HRMS (ESI):**  $m/z$  calcd for C<sub>22</sub>H<sub>24</sub>NO<sub>3</sub>: [M+H]<sup>+</sup>: 350.1756; found: 350.1755

1-phenyl-3-(prop-2-yn-1-yloxy)propan-1-one **1n**

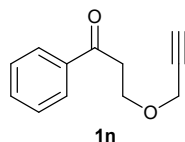

The compound **1n** was obtained from compound **30** following the **GPVI** on 17.8 mmol scale (2.4 g). Purification by flash chromatography on silica gel (EtOAc/Cyclohexane: 4/96) afforded **1n** as a colorless oil (m= 2.8 g, 83% yield).

**<sup>1</sup>H NMR (400 MHz, CDCl<sub>3</sub>)**  $\delta$  7.97 – 7.94 (m, 2H), 7.58 – 7.53 (m, 1H), 7.48 – 7.43 (m, 2H), 4.18 (d,  $J$  = 2.4 Hz, 2H), 3.97 (t,  $J$  = 6.4 Hz, 2H), 3.27 (t,  $J$  = 6.4 Hz, 2H), 2.44 (t,  $J$  = 2.4 Hz, 1H)

**<sup>13</sup>C NMR (100 MHz, CDCl<sub>3</sub>)**  $\delta$  198.0, 137.0, 133.3, 128.7 (2C), 128.2 (2C), 79.7, 74.6, 65.4, 58.5, 38.7

**FTIR (neat):**  $\nu$  = 3298, 1680, 1449, 1216, 1099, 908, 728, 688 cm<sup>-1</sup>

**HRMS (ESI):**  $m/z$  calcd for C<sub>12</sub>H<sub>12</sub>O<sub>2</sub>Na<sup>+</sup>: [M+Na]<sup>+</sup>: 211.0735; found: 211.0734

1-(benzyl(prop-2-yn-1-yl)amino)-5-phenylpentan-3-one **4f**

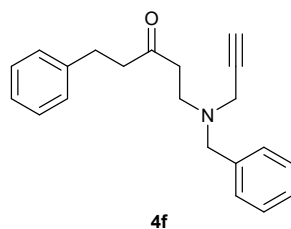

The compound **4f** was obtained from compound **26** and **20** following the **GPIV** on 1.6 mmol scale (256 mg). Purification by flash chromatography on silica gel (EtOAc/Cyclohexane: 5/95) afforded **4f** as a yellow oil (m= 460 mg, 94% yield).

**<sup>1</sup>H NMR (400 MHz, CDCl<sub>3</sub>)**  $\delta$  7.35 – 7.21 (m, 10H), 3.67 (s, 2H), 3.34 (d,  $J$  = 2.4 Hz, 2H), 2.94 (t,  $J$  = 7.4 Hz, 2H), 2.93 (t,  $J$  = 7.0 Hz, 2H), 2.77 (t,  $J$  = 7.4 Hz, 2H), 2.62 (t,  $J$  = 7.0 Hz, 2H), 2.29 (t,  $J$  = 2.4 Hz, 1H)

**<sup>13</sup>C NMR (100 MHz, CDCl<sub>3</sub>)**  $\delta$  208.8, 141.1, 138.4, 129.1 (2C), 128.5 (2C), 128.4 (2C), 128.3 (2C), 127.3, 126.1, 78.2, 73.5, 57.9, 48.3, 44.1, 41.5, 41.4, 29.6

**FTIR (neat):**  $\nu$  = 1710, 1454, 906, 729, 698 cm<sup>-1</sup>

**HRMS (ESI):**  $m/z$  calcd for C<sub>21</sub>H<sub>24</sub>NO: [M+H]<sup>+</sup>: 306.1858; found: 306.1852

4-methyl-*N*-(3-oxo-3-phenylpropyl)-*N*-(prop-2-yn-1-yl)benzenesulfonamide **1j**

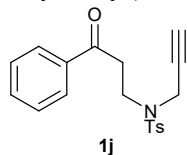

The compound **1j** was obtained from compound **30** and **21** following the **GPIV** on 12 mmol scale (1.6 g). Purification by flash chromatography on silica gel (EtOAc/Cyclohexane: 5/95 to 15/85) provided **1j** as a white solid (m=1.2 g, 30% yield).

All the spectroscopic data are in accordance with those described in the literature<sup>21</sup>.

dimethyl 2-(but-3-yn-1-yl)-2-(3-oxo-3-phenylpropyl)malonate **1f**

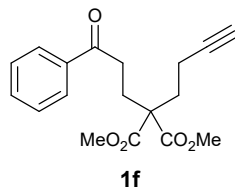

The compound **1f** was obtained from compound **30** and **18** following the **GPIV** on 4 mmol scale (528.6 mg). Purification by flash chromatography on silica gel (EtOAc/Cyclohexane: 5/95 to 7/93) provided **1f** as a white solid (m=822.5 mg, 65% yield).

**<sup>1</sup>H NMR (300 MHz, CDCl<sub>3</sub>)**  $\delta$  7.94 – 7.91 (m, 2H), 7.57 – 7.52 (m, 1H), 7.47 - 7.42 (m, 2H), 3.72 (s, 6H), 2.98 (t,  $J$  = 7.8 Hz, 2H), 2.33 (t,  $J$  = 7.8 Hz, 2H), 2.21 (s, 4H), 1.95 (t,  $J$  = 2.4 Hz, 1H)

**<sup>13</sup>C NMR (100 MHz, CDCl<sub>3</sub>)**  $\delta$  198.6, 171.3 (2C), 136.7, 133.3, 128.7 (2C), 128.1 (2C), 83.1, 69.1, 56.6, 52.7 (2C), 33.8, 32.9, 27.5, 14.2

**FTIR (neat):**  $\nu$  = 3292, 2954, 1728, 1686, 1449, 1202, 906, 732 cm<sup>-1</sup>

**HRMS (ESI):**  $m/z$  calcd for C<sub>18</sub>H<sub>21</sub>O<sub>5</sub>: [M+H]<sup>+</sup>: 317.1389; found: 317.1386

<sup>21</sup> S., Watanuki, N., Ochifuji, M., Mori, *Organometallics*, 1995, **14**, 5062-5067.



## 4. Cyclized Products

### General procedure for the cyclization reaction GPVII:

In a vial protected from the light was placed a suspension of Ag<sub>2</sub>O (0.1 mmol, 0.5 eq.) in CH<sub>3</sub>CN (0.5 mL). DBU (0.2 mmol, 1 eq.) was added, then a solution of corresponding precursors (0.2 mmol, 1 eq.) in CH<sub>3</sub>CN (0.5 mL) was added dropwise. The mixture was heated to 50 °C under air atmosphere and stirred until TLC showed complete disappearance of the starting material. The reaction mixture was quenched by water and extracted twice with Et<sub>2</sub>O. The combined organic layers were dried over MgSO<sub>4</sub> and evaporated under reduced pressure. The crude mixture was purified by flash chromatography on silica gel affording the expected compound in a pure form.

### General procedure for the one-pot reaction GPVIII:

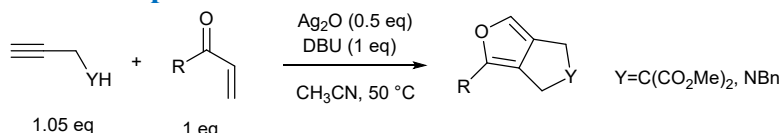

A vial protected from the light was charged with the alkyne (0.21 mmol, 1.05 eq.) and the  $\alpha$ - $\beta$  unsaturated ketone (0.2 mmol, 1 eq.). The mixture was solubilized in CH<sub>3</sub>CN (1 mL) then Ag<sub>2</sub>O (0.1 mmol, 0.5 eq.) and DBU (0.2 mmol, 1 eq.) was successively introduced. The reaction was heated to 50 °C under air atmosphere and stirred until TLC showed complete disappearance of the starting materials. The reaction was quenched by water and extracted twice with Et<sub>2</sub>O. The combined organic layers were dried over MgSO<sub>4</sub> and evaporated under reduced pressure. The crude mixture was purified by flash chromatography on silica gel affording the expected compound in a pure form.

### dimethyl 1-phenyl-4*H*-cyclopenta[*c*]furan-5,5(6*H*)-dicarboxylate **2a**

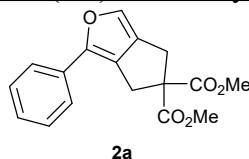

The compound **2a** was obtained from compound **1a** following the **GPVII** on 0.2 mmol scale (60.5 mg). Purification by flash chromatography on silica gel (EtOAc/Cyclohexane: 5/95 to 10/90) afforded **2a** as a pale yellow solid (m= 45 mg, 75% yield).

<sup>1</sup>H NMR (400 MHz, CDCl<sub>3</sub>)  $\delta$  7.57 – 7.55 (m, 2H), 7.40 – 7.36 (m, 2H), 7.24 -7.21 (m, 1H), 7.12 (s, 1H), 3.77 (s, 6H), 3.56 (s, 2H), 3.35 (d, *J* = 1.2 Hz, 2H)

<sup>13</sup>C NMR (100 MHz, CDCl<sub>3</sub>)  $\delta$  171.6 (2C), 144.3, 132.5, 131.1, 130.9, 128.8 (2C), 126.8, 125.1, 123.9 (2C), 67.5, 53.2 (2C), 33.5, 31.8

FTIR (neat):  $\nu$  = 2954, 1732, 1435, 1248, 1199, 963, 906, 728, 692 cm<sup>-1</sup>

HRMS (ESI): *m/z* calcd for C<sub>17</sub>H<sub>16</sub>O<sub>5</sub>Na<sup>+</sup>: [M+Na]<sup>+</sup>: 323.0895; found: 323.0892

### dimethyl 1-(4-chlorophenyl)-4*H*-cyclopenta[*c*]furan-5,5(6*H*)-dicarboxylate **2b**

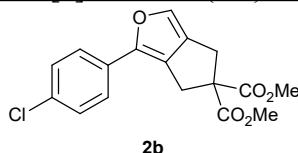

The compound **2b** was obtained from compound **2a** following the **GPVII** on 0.2 mmol scale (67.4 mg). Purification by flash chromatography (EtOAc/Cyclohexane: 5/95) afforded **2b** as white solid (m= 45.5 mg, 68% yield).

The compound **2b** was obtained from compound **29** and **14** following the **GPVIII** on 0.2 mmol scale (33.3 mg). Purification by flash chromatography (EtOAc/Cyclohexane: 5/95) afforded **2b** as a white solid (m= 43.5 mg, 65% yield).

**<sup>1</sup>H NMR (400 MHz, CDCl<sub>3</sub>)**  $\delta$  7.48 – 7.45 (m, 2H), 7.35 – 7.31 (m, 2H), 7.10 (s, 1H), 3.77 (s, 6H), 3.52 (s, 2H), 3.34 (d,  $J$  = 1.6 Hz, 2H)

**<sup>13</sup>C NMR (100 MHz, CDCl<sub>3</sub>)**  $\delta$  171.5 (2C), 143.4, 132.8, 132.4, 131.1, 129.6, 129.0 (2C), 125.6, 125.1 (2C), 67.5, 53.3 (2C), 33.4, 31.8

**FTIR (neat):**  $\nu$  = 2955, 1733, 1489, 1435, 1250, 1092, 908, 830, 730 cm<sup>-1</sup>

**HRMS (ESI):**  $m/z$  calcd for C<sub>17</sub>H<sub>16</sub>ClO<sub>5</sub>: [M+H]<sup>+</sup>: 335.0686; found: 335.0684

dimethyl 1-(naphthalen-2-yl)-4H-cyclopenta[*c*]furan-5,5(6H)-dicarboxylate **2d**

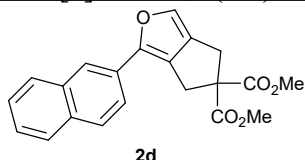

The compound **2d** was obtained from compound **1d** following the **GPVII** on 0.2 mmol scale (70.5 mg). Purification by flash chromatography on silica gel (EtOAc/Cyclohexane: 10/90 to 15/85) afforded **2d** as a white solid ( $m$  = 56.3 mg, 80% yield).

**<sup>1</sup>H NMR (400 MHz, CDCl<sub>3</sub>)**  $\delta$  8.00 (s, 1H), 7.86– 7.80 (m, 3H), 7.72 - 7.69 (m, 1H), 7.50 – 7.42 (m, 2H), 7.18 (s, 1H), 3.80 (s, 6H), 3.66 (s, 2H), 3.39 (d,  $J$  = 1.6 Hz, 2H)

**<sup>13</sup>C NMR (100 MHz, CDCl<sub>3</sub>)**  $\delta$  171.6 (2C), 144.5, 133.6, 132.7, 132.3, 131.1, 128.5, 128.4, 128.1, 127.8, 126.5, 125.9, 125.6, 122.4, 122.2, 67.5, 53.2 (2C), 33.6, 31.8

**FTIR (neat):**  $\nu$  = 2954, 1732, 1435, 1250, 1199, 1066, 905, 816, 725 cm<sup>-1</sup>

**HRMS (ESI):**  $m/z$  calcd for C<sub>21</sub>H<sub>19</sub>O<sub>5</sub>: [M+H]<sup>+</sup>: 351.1232; found: 351.1237

dimethyl 1-(3,4-dimethoxyphenyl)-4H-cyclopenta[*c*]furan-5,5(6H)-dicarboxylate **2e**

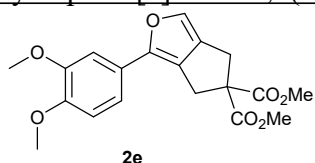

The compound **2e** was obtained from compound **1e** following the **GPVII** on 0.2 mmol scale (72.5 mg). Purification by flash chromatography on silica gel (EtOAc/Cyclohexane: 20/80 to 30/70) afforded **2e** as a yellow solid ( $m$  = 52.6 mg, 73% yield).

**<sup>1</sup>H NMR (400 MHz, CDCl<sub>3</sub>)**  $\delta$  7.11 – 7.10 (m, 1H), 7.08 - 7.05 (m, 2H), 6.88 – 6.86 (m, 1H), 3.92 (s, 3H), 3.88 (s, 3H), 3.76 (s, 6H), 3.51 (s, 2H), 3.32 (d,  $J$  = 1.6 Hz, 2H)

**<sup>13</sup>C NMR (100 MHz, CDCl<sub>3</sub>)**  $\delta$  171.6 (2C), 149.3, 148.2, 144.3, 131.8, 130.9, 124.5, 123.5, 116.7, 111.5, 107.2, 67.5, 56.0, 55.9, 53.2 (2C), 33.3, 31.8

**FTIR (neat):**  $\nu$  = 2256, 1733, 1512, 1247, 1025, 906, 730 cm<sup>-1</sup>

**HRMS (ESI):**  $m/z$  calcd for C<sub>19</sub>H<sub>21</sub>O<sub>7</sub>: [M+H]<sup>+</sup>: 361.1287; found: 361.1289

dimethyl 1,6-diphenyl-4H-cyclopenta[*c*]furan-5,5(6H)-dicarboxylate **2g**

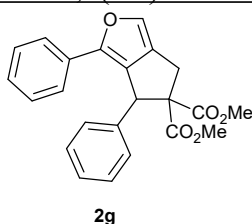

The compound **2g** was obtained from compound **1g** following the **GPVII** on 0.2 mmol scale (75.7 mg). Purification by flash chromatography on silica gel (EtOAc/Cyclohexane: 5/95) afforded **2g** as a white solid ( $m$  = 31.6 mg, 42% yield).

The compound **2g** was obtained from chalcone and compound **14** following the **GPVIII** on 0.2 mmol scale (41.6 mg). Purification by flash chromatography on silica gel (EtOAc/Cyclohexane: 5/95) afforded **2g** as a white solid (m= 35.4 mg, 47% yield).

**<sup>1</sup>H NMR (400 MHz, CDCl<sub>3</sub>)** δ 7.37 – 7.35 (m, 2H), 7.27 – 7.18 (m, 8H), 7.14 – 7.10 (m, 1H), 5.30 (s, 1H), 3.79 (d, *J* = 16.4 Hz, 1H), 3.77 (s, 3H), 3.31 (s, 3H), 3.24 (d, *J* = 16.4 Hz, 1H)

**<sup>13</sup>C NMR (100 MHz, CDCl<sub>3</sub>)** δ 171.8, 168.8, 145.1, 138.1, 132.6, 130.7, 130.6, 129.0 (2C), 128.8, 128.5 (2C), 128.4 (2C), 127.7, 126.9, 124.3 (2C), 73.8, 53.3, 52.3, 50.0, 30.6

**FTIR (neat):** ν = 2952, 1733, 1435, 1259, 1160, 907, 729 cm<sup>-1</sup>

**HRMS (ESI):** *m/z* calcd for C<sub>23</sub>H<sub>21</sub>O<sub>5</sub>: [M+H]<sup>+</sup>: 377.1389; found: 377.1388

dimethyl 1-(4-fluorophenyl)-4*H*-cyclopenta[*c*]furan-5,5(6*H*)-dicarboxylate **2c**

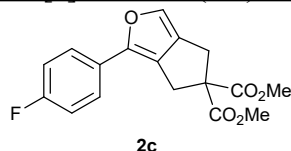

The compound **2c** was obtained from compound **1c** following the **GPVII** on 0.2 mmol scale (64.1 mg). Purification by flash chromatography on silica gel (EtOAc/Cyclohexane: 5/95) afforded **2c** as a white solid (m= 50.9 mg, 80% yield).

The compound **2c** was obtained from compound **24** and **14** following the **GPVIII** on 0.2 mmol scale (30 mg). Purification by flash chromatography on silica gel (EtOAc/Cyclohexane: 5/95) afforded **2c** as a white solid (m= 48.4 mg, 76% yield).

**<sup>1</sup>H NMR (400 MHz, CDCl<sub>3</sub>)** δ 7.53 – 7.49 (m, 2H), 7.09 – 7.04 (m, 3H), 3.77 (s, 6H), 3.51 (s, 2H), 3.34 (d, *J* = 1.6 Hz, 2H)

**<sup>13</sup>C NMR (100 MHz, CDCl<sub>3</sub>)** δ 171.5 (2C), 161.7 (d, *J* = 245.0 Hz), 143.6, 132.4, 131.0, 127.5 (d, *J* = 3.0 Hz), 125.6 (d, *J* = 8.0 Hz, 2C), 124.6, 115.8 (d, *J* = 21.0 Hz, 2C), 67.5, 53.2 (2C), 33.3, 31.9

**<sup>19</sup>F NMR (280 MHz, CDCl<sub>3</sub>)** δ -114.8

**FTIR (neat):** ν = 2955, 1732, 1506, 1435, 1232, 1157, 1064, 907, 835, 731 cm<sup>-1</sup>

**HRMS (ESI):** *m/z* calcd for C<sub>17</sub>H<sub>16</sub>O<sub>5</sub>F: [M+H]<sup>+</sup>: 319.0982; found: 319.0980

dimethyl 1-methyl-4*H*-cyclopenta[*c*]furan-5,5(6*H*)-dicarboxylate **5c**

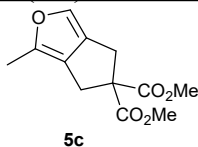

The compound **5c** was obtained from compound **4c** following the **GPVII** on 0.2 mmol scale (48.1 mg). Purification by flash chromatography on silica gel (EtOAc/Cyclohexane: 5/95) afforded **5c** as a yellow solid (m= 34.7 mg, 73% yield).

The compound **5c** was obtained from methyl vinyl ketone and compound **14** following the **GPVIII** on 0.2 mmol scale (14 mg). Purification by flash chromatography on silica gel (EtOAc/Cyclohexane: 5/95) afforded **5c** as a yellow solid (m= 33.4 mg, 70% yield).

**<sup>1</sup>H NMR (400 MHz, CDCl<sub>3</sub>)** δ 6.92 (s, 1H), 3.74 (s, 6H), 3.26 (s, 2H), 3.19 (s, 2H), 2.18 (s, 3H)

**<sup>13</sup>C NMR (100 MHz, CDCl<sub>3</sub>)** δ 171.8 (2C), 142.5, 131.3, 129.2, 123.8, 67.3, 53.1 (2C), 32.2, 31.6, 12.7

**FTIR (neat):** ν = 2955, 2258, 1732, 1435, 1257, 1199, 1066, 908, 727 cm<sup>-1</sup>

**HRMS (ESI):** *m/z* calcd for C<sub>12</sub>H<sub>14</sub>O<sub>5</sub>Na<sup>+</sup>: [M+Na]<sup>+</sup>: 261.0739; found: 261.0737

dimethyl 1-pentyl-4*H*-cyclopenta[*c*]furan-5,5(6*H*)-dicarboxylate **13a**

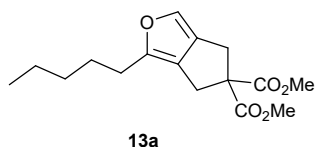

The compound **13a** was obtained from oct-1-en-3-one and compound **14** following the **GPVIII** on 0.2 mmol scale (25.2 mg). Purification by flash chromatography on silica gel (EtOAc/Cyclohexane: 5/95) afforded **13a** as a yellow solid (m= 37.7 mg, 64% yield).

**<sup>1</sup>H NMR (300 MHz, CDCl<sub>3</sub>)**  $\delta$  6.93 (s, 1H), 3.75 (s, 6H), 3.26 – 3.22 (m, 4H), 2.53 (t, *J* = 7.6 Hz, 2H), 1.65 - 1.56 (m, 2H), 1.34 - 1.25 (m, 4H), 0.89 (t, *J* = 6.8 Hz, 3H)

**<sup>13</sup>C NMR (100 MHz, CDCl<sub>3</sub>)**  $\delta$  171.8 (2C), 146.8, 131.2, 129.1, 123.3, 67.3, 53.1 (2C), 32.0, 31.9, 31.5, 27.4, 27.3, 22.5, 14.1

**FTIR (neat):**  $\nu$  = 2955, 1735, 1435, 1254, 1198, 1159, 1066, 731 cm<sup>-1</sup>

**HRMS (ESI):** *m/z* calcd for C<sub>16</sub>H<sub>23</sub>O<sub>5</sub>: [M+H]<sup>+</sup>: 295.1545; found: 295.1544

dimethyl 6-methyl-1-phenethyl-4H-cyclopenta[*c*]furan-5,5(6H)-dicarboxylate **5a**

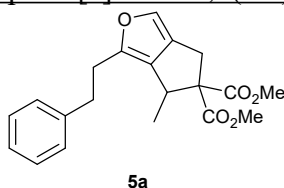

The compound **5a** was obtained from compound **4a** following the **GPVII** on 0.2 mmol scale (68.8 mg). Purification by flash chromatography on silica gel (EtOAc/Cyclohexane: 3/97 to 7/93) afforded **5a** as a yellow solid (m= 45.8 mg, 67% yield).

**<sup>1</sup>H NMR (400 MHz, CDCl<sub>3</sub>)**  $\delta$  7.29 – 7.25 (m, 2H), 7.20 – 7.16 (m, 1H), 7.14 – 7.12 (m, 2H), 6.95 (s, 1H), 3.75-3.69 (m, 7H), 3.43 (dd, *J* = 16, 1.6 Hz, 1H), 3.03 (dd, *J* = 16, 1.6 Hz, 1H), 2.97 – 2.91 (m, 2H), 2.90 – 2.78 (m, 2H), 0.96 (d, *J* = 7.2 Hz, 3H)

**<sup>13</sup>C NMR (100 MHz, CDCl<sub>3</sub>)**  $\delta$  171.9, 170.2, 145.4, 141.4, 131.4, 129.4, 128.5 (2C), 128.4 (2C), 127.7, 126.1, 71.2, 52.9, 52.4, 37.6, 34.7, 30.6, 29.5, 16.2

**FTIR (neat):**  $\nu$  = 2953, 1733, 1434, 1252, 1159, 1084, 1042, 738, 700 cm<sup>-1</sup>

**HRMS (ESI):** *m/z* calcd for C<sub>20</sub>H<sub>23</sub>O<sub>5</sub>: [M+H]<sup>+</sup>: 343.1545; found: 343.1545

dimethyl 1-phenethyl-4H-cyclopenta[*c*]furan-5,5(6H)-dicarboxylate **5b**

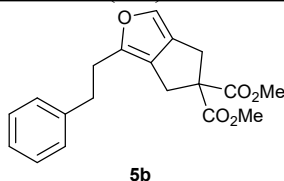

The compound **5b** was obtained from compound **4b** following the **GPVII** on 0.2 mmol scale (66.1 mg). Purification by flash chromatography on silica gel (EtOAc/Cyclohexane: 8/92) afforded **5b** as a white solid (m= 45.3 mg, 69% yield).

**<sup>1</sup>H NMR (400 MHz, CDCl<sub>3</sub>)**  $\delta$  7.29 – 7.25 (m, 2H), 7.21 – 7.12 (m, 3H), 6.96 (s, 1H), 3.73 (s, 6H), 3.24 (d, *J* = 1.6 Hz, 2H), 3.07 (s, 2H), 2.95 – 2.90 (m, 2H), 2.87 – 2.82 (m, 2H)

**<sup>13</sup>C NMR (100 MHz, CDCl<sub>3</sub>)**  $\delta$  171.7 (2C), 145.4, 141.2, 131.4, 129.2, 128.4 (2C), 128.3 (2C), 126.0, 124.0, 67.2, 53.0 (2C), 34.0, 31.9, 31.7, 29.3

**FTIR (neat):**  $\nu$  = 2953, 1733, 1434, 1253, 1198, 1065, 909, 729, 699 cm<sup>-1</sup>

**HRMS (ESI):** *m/z* calcd for C<sub>19</sub>H<sub>21</sub>O<sub>5</sub>: [M+H]<sup>+</sup>: 329.1389; found: 329.1386

dimethyl (*S*)-1-(2,6-dimethylhept-5-en-1-yl)-4H-cyclopenta[*c*]furan-5,5(6H)-dicarboxylate **5e**



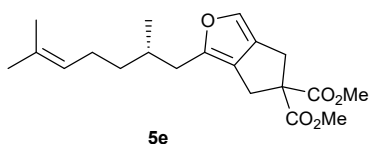

5e

The compound **5e** was obtained from compound **4e** following the **GPVII** on 0.2 mmol scale (70.1 mg). Purification by flash chromatography on silica gel (EtOAc/Cyclohexane: 5/95) afforded **5e** as a pale yellow oil (m= 41.8 mg, 60% yield).

**<sup>1</sup>H NMR (300 MHz, CDCl<sub>3</sub>)**  $\delta$  6.94 (s, 1H), 5.11 – 5.05 (m, 1H), 3.74 (s, 6H), 3.26 (d,  $J$  = 1.2 Hz, 2H), 3.19 (s, 2H), 2.53 (dd,  $J$  = 15.0, 6.0 Hz, 1H), 2.35 (dd,  $J$  = 15.0, 6.0 Hz, 1H), 2.07 – 1.89 (m, 2H), 1.85–1.73 (m, 1H), 1.67 (s, 3H), 1.60 (s, 3H), 1.40 – 1.10 (m, 3H), 0.88 (d,  $J$  = 6.6 Hz, 3H)

**<sup>13</sup>C NMR (100 MHz, CDCl<sub>3</sub>)**  $\delta$  171.7 (2C), 145.9, 131.4, 131.3, 128.9, 124.8, 124.1, 67.3, 53.0 (2C), 36.8, 34.8, 32.4, 32.1, 32.0, 25.8, 25.7, 19.7, 17.7

**FTIR (neat):**  $\nu$  = 2955, 1734, 1435, 1255, 1199, 1066, 908, 729 cm<sup>-1</sup>

**HRMS (ESI):**  $m/z$  calcd for C<sub>20</sub>H<sub>29</sub>O<sub>5</sub>: [M+H]<sup>+</sup>: 349.2015; found: 349.2013

**[ $\alpha$ ]<sub>D</sub><sup>25</sup>** = -1.6 (c = 0.5, CHCl<sub>3</sub>)

#### 4-ethyl 5,5-dimethyl 3-phenyl-4*H*-cyclopenta[*c*]furan-4,5,5(6*H*)-tricarboxylate **2h**

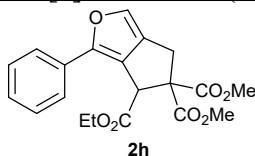

2h

The compound **2h** was obtained from compound **1h** following the **GPVII** on 0.2 mmol scale (74.9 mg). Purification by flash chromatography on silica gel (EtOAc/Cyclohexane: 8/92 to 13/87) afforded **2h** as a white solid (m= 52.1 mg, 70% yield).

**<sup>1</sup>H NMR (400 MHz, CDCl<sub>3</sub>)**  $\delta$  7.80 – 7.77 (m, 2H), 7.41 - 7.37 (m, 2H), 7.28 – 7.23 (m, 1H), 7.15 (s, 1H), 4.84 (s, 1H), 4.17 – 4.03 (m, 2H), 3.78 (s, 3H), 3.71 (s, 3H), 3.70 (dd,  $J$  = 16.0, 2.0 Hz, 1H), 3.36 (d,  $J$  = 16.0 Hz, 1H), 1.16 (t,  $J$  = 7.0 Hz, 3H)

**<sup>13</sup>C NMR (100 MHz, CDCl<sub>3</sub>)**  $\delta$  170.3, 170.2, 169.1, 146.0, 133.1, 130.3, 130.2, 128.6 (2C), 127.5, 124.6 (2C), 123.6, 71.2, 61.6, 53.7, 53.0, 49.9, 30.9, 14.0

**FTIR (neat):**  $\nu$  = 2955, 2259, 1735, 1239, 1163, 1025, 905, 725, 691 cm<sup>-1</sup>

**HRMS (ESI):**  $m/z$  calcd for C<sub>20</sub>H<sub>21</sub>O<sub>7</sub>: [M+H]<sup>+</sup>: 373.1287; found: 373.1283

#### dimethyl 3-methyl-4-oxo-4,5,6,6a-tetrahydropentalene-1,1(2*H*)-dicarboxylate **7a**

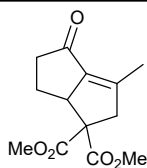

7a

The compound **7a** was obtained from compound **6a** following the **GPVII** on 0.2 mmol scale (50.5 mg). Purification by flash chromatography on silica gel (EtOAc/Cyclohexane: 15/85 to 20/80) afforded **7a** as a colorless oil (m= 24.2 mg, 48% yield).

All the spectroscopic datas are in accordance with those described in the literature<sup>22</sup>

#### dimethyl 3,4,5,5a-tetrahydroindeno[7,1-*bc*]furan-6,6(7*H*)-dicarboxylate **8b**

<sup>22</sup> T., Yang, A., Ferrali, L., Campbell, D. J. Dixon, *Chem. Commun.*, 2008, 2923-2925.

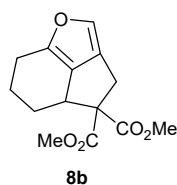

The compound **8b** was obtained from compound **6b** following the **GPVII** on 0.4 mmol scale (106.5 mg). Purification by flash chromatography on silica gel (EtOAc/Cyclohexane: 5/95) afforded **8b** as a yellow solid (m= 50 mg, 47% yield).

**<sup>1</sup>H NMR (300 MHz, CDCl<sub>3</sub>)**  $\delta$  7.04 (s, 1H), 3.78 (s, 3H), 3.70 – 3.64 (m, 1H), 3.63 (s, 3H), 3.36 (d,  $J$  = 15.3 Hz, 1H), 3.11 (dd,  $J$  = 15.3, 1.8 Hz, 1H), 2.65 – 2.58 (m, 1H), 2.44 – 2.32 (m, 1H), 2.15 – 2.06 (m, 2H), 1.95 – 1.79 (m, 1H), 0.72 – 0.59 (m, 1H)

**<sup>13</sup>C NMR (100 MHz, CDCl<sub>3</sub>)**  $\delta$  171.5, 170.4, 147.8, 134.8, 133.4, 126.5, 73.1, 52.8, 52.1, 40.6, 35.6, 27.6, 25.2, 23.8

**FTIR (neat):**  $\nu$  = 2951, 1731, 1435, 1269, 1242, 1081, 1037, 933 cm<sup>-1</sup>

**HRMS (ESI):**  $m/z$  calcd for C<sub>14</sub>H<sub>17</sub>O<sub>5</sub>: [M+H]<sup>+</sup>: 265.1076; found: 265.1075

dimethyl 3-methyl-4-oxo-2,4,5,6,7,7a-hexahydro-1H-indene-1,1-dicarboxylate **7b**

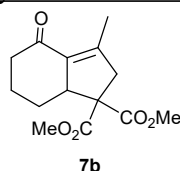

The compound **7b** was obtained from compound **6b** following the **GPVII** on 0.4 mmol scale (106.5 mg). Purification by flash chromatography on silica gel (EtOAc/Cyclohexane: 5/95) afforded **7b** as a white solid (m= 32 mg, 30% yield).

All the spectroscopic datas are in accordance with those described in the literature<sup>20</sup>.

dimethyl 6,7,8,9-tetrahydro-5H-5,9a-methanocycloocta[b]furan-4,4(3aH)-dicarboxylate **9c**

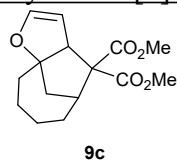

The compound **9c** was obtained from compound **6c** following the **GPVII** on 0.2 mmol scale (56.1 mg). Purification by flash chromatography on silica gel (EtOAc/Cyclohexane: 2/98 to 5/95) afforded **9c** as a yellow solid (m= 28.2 mg, 51% yield).

**<sup>1</sup>H NMR (400 MHz, CDCl<sub>3</sub>)**  $\delta$  6.15 (t,  $J$  = 2.4 Hz, 1H), 4.72 (t,  $J$  = 2.4 Hz, 1H), 3.95 (s, 1H), 3.72 (s, 3H), 3.65 (s, 3H), 2.85 – 2.81 (m, 1H), 2.35 (dd,  $J$  = 12.8, 7.2 Hz, 1H), 2.21 (d,  $J$  = 12.8 Hz, 1H), 1.98 – 1.92 (m, 1H), 1.85 – 1.78 (m, 1H), 1.75 – 1.68 (m, 1H), 1.59 - 1.48 (m, 2H), 1.46 – 1.31 (m, 3H)

**<sup>13</sup>C NMR (100 MHz, CDCl<sub>3</sub>)**  $\delta$  171.0, 170.9, 144.6, 99.2, 96.4, 69.5, 59.3, 52.4, 51.9, 42.3, 42.2, 37.5, 31.3, 24.0, 23.7

**FTIR (neat):**  $\nu$  = 2950, 1729, 1615, 1434, 1262, 1195, 1155, 1073, 909, 727 cm<sup>-1</sup>

**HRMS (ESI):**  $m/z$  calcd for C<sub>15</sub>H<sub>21</sub>O<sub>5</sub>: [M+H]<sup>+</sup>: 281.1389; found: 281.1385

dimethyl 5,6,7,8-tetrahydro-3H-azuleno[8,1-bc]furan-4,4(4aH)-dicarboxylate **8c**

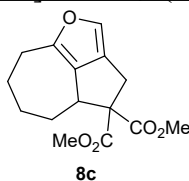

The compound **8c** was obtained from compound **6c** following the **GPVII** on 0.2 mmol scale (56.1 mg). Purification by flash chromatography on silica gel (EtOAc/Cyclohexane: 2/98 to 5/95) afforded **8c** as a yellow solid (m= 22.3 mg, 40% yield).

**<sup>1</sup>H NMR (300 MHz, CDCl<sub>3</sub>)**  $\delta$  6.89 (s, 1H), 3.78 (s, 3H), 3.68 (s, 3H), 3.66 – 3.59 (m, 1H), 3.37 (dd,  $J$  = 15.9, 0.9 Hz, 1H), 2.96 (dd,  $J$  = 15.9, 1.8 Hz, 1H), 2.75 – 2.67 (m, 1H), 2.64 - 2.52 (m, 1H), 2.27 – 2.17 (m, 1H), 2.17-2.09 (m, 1H), 2.06-1.96 (m, 1H), 1.51 – 1.37 (m, 2H), 1.06 – 0.94 (m, 1H)

**<sup>13</sup>C NMR (100 MHz, CDCl<sub>3</sub>)**  $\delta$  171.8, 171.1, 148.0, 130.8, 129.5, 128.1, 70.4, 52.8, 52.2, 44.5, 33.5, 31.6, 28.1, 27.7, 27.6

**FTIR (neat):**  $\nu$  = 2925, 1730, 1435, 1264, 1219, 1173, 1071, 910, 728 cm<sup>-1</sup>

**HRMS (ESI):**  $m/z$  calcd for C<sub>15</sub>H<sub>19</sub>O<sub>5</sub>: [M+H]<sup>+</sup>: 279.1232; found: 279.1230

#### dimethyl 1-cyclohexyl-4H-cyclopenta[*c*]furan-5,5(6H)-dicarboxylate **5d**

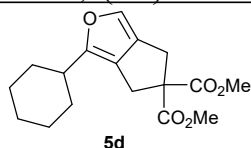

The compound **5d** was obtained from compound **4d** following the **GPVII** on 0.2 mmol scale (61.7 mg). Purification by flash chromatography on silica gel (EtOAc/Cyclohexane: 10/90 to 20/80) afforded **5d** as a colorless oil (m= 38.3 mg, 63% yield).

**<sup>1</sup>H NMR (400 MHz, CDCl<sub>3</sub>)**  $\delta$  6.92 (s, 1H), 3.74 (s, 6H), 3.26 (dd,  $J$  = 14.0, 1.2 Hz, 4H), 2.60 – 2.55 (m, 1H), 2.00 – 1.97 (m, 2H), 1.77 – 1.76 (m, 3H), 1.43 – 1.21 (m, 5H)

**<sup>13</sup>C NMR (100 MHz, CDCl<sub>3</sub>)**  $\delta$  171.8 (2C), 150.5, 130.8, 129.2, 121.9, 67.3, 53.1 (2C), 37.3, 32.6, 31.7, 31.2 (2C), 26.2, 26.0 (2C)

**FTIR (neat):**  $\nu$  = 2928, 2854, 1734, 1435, 1256, 1199, 1066, 909, 730 cm<sup>-1</sup>

**HRMS (ESI):**  $m/z$  calcd for C<sub>17</sub>H<sub>23</sub>O<sub>5</sub>: [M+H]<sup>+</sup>: 307.1545; found: 307.1541

#### 4-(4-chlorophenyl)-1H,3H-furo[3,4-*c*]furan **2o**

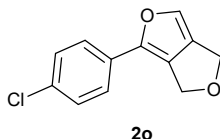

The compound **2o** was obtained from compound **1o** following the **GPVII** on 0.2 mmol scale (44.5 mg). Purification by flash chromatography on silica gel (EtOAc/Cyclohexane: 5/95) afforded **2o** as a yellow solid (m= 15.4 mg, 35% yield).

**<sup>1</sup>H NMR (400 MHz, CDCl<sub>3</sub>)**  $\delta$  7.35 (s, 4H), 7.15 (s, 1H), 4.99 (s, 2H), 4.86 (s, 2H)

**<sup>13</sup>C NMR (100 MHz, CDCl<sub>3</sub>)**  $\delta$  141.8, 132.9, 132.7, 130.5, 129.2 (2C), 129.1, 127.1, 125.2 (2C), 66.4, 65.6

**FTIR (neat):**  $\nu$  = 2925, 1490, 1092, 1015, 908, 732 cm<sup>-1</sup>

**HRMS (ESI):**  $m/z$  calcd for C<sub>12</sub>H<sub>10</sub>ClO<sub>2</sub>: [M+H]<sup>+</sup>: 221.0369; found: 221.0368

#### 5-benzyl-1-phenyl-5,6-dihydro-4H-furo[3,4-*c*]pyrrole **2k**

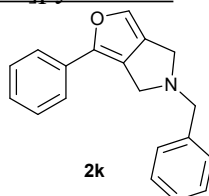

The compound **2k** was obtained from compound **1k** following the **GPVII** on 0.4 mmol scale (110.9 mg). Purification by flash chromatography on silica gel (EtOAc/Cyclohexane: 5/95 to 10/90) afforded **2k** as a white solid (m= 78.2 mg, 71% yield).

**<sup>1</sup>H NMR (400 MHz, CDCl<sub>3</sub>)**  $\delta$  7.53 – 7.50 (m, 2H), 7.48 – 7.44 (m, 2H), 7.42 – 7.30 (m, 5H), 7.26 – 7.21 (m, 1H), 7.14 (s, 1H), 3.98 (s, 2H), 3.93 (s, 2H), 3.78 (s, 2H)

**<sup>13</sup>C NMR (100 MHz, CDCl<sub>3</sub>)**  $\delta$  143.4, 139.1, 131.2, 131.1, 131.0, 128.8 (2C), 128.7 (2C), 128.6 (2C), 127.3, 126.8, 125.5, 123.9 (2C), 60.4, 52.2, 51.1

**FTIR (neat):**  $\nu$  = 2789, 1494, 1044, 966, 906, 841, 762, 731, 689 cm<sup>-1</sup>

**HRMS (ESI):**  $m/z$  calcd for C<sub>19</sub>H<sub>18</sub>NO: [M+H]<sup>+</sup>: 276.1388; found: 276.1387

5-benzyl-1-pentyl-5,6-dihydro-4H-furo[3,4-c]pyrrole **13b**

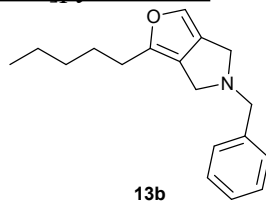

The compound **13b** was obtained from oct-1-en-3-one and compound **20** following the **GPVIII** on 0.4 mmol scale (50.5 mg). Purification by flash chromatography on silica gel (EtOAc/Cyclohexane: 5/95 to 7/93) afforded **13b** as a colorless oil (m= 71.1 mg, 66% yield).

**<sup>1</sup>H NMR (300 MHz, CDCl<sub>3</sub>)**  $\delta$  7.44 - 7.41 (m, 2H), 7.39 – 7.26 (m, 3H), 6.97 (s, 1H), 3.91 (s, 2H), 3.67 (s, 2H), 3.63 (s, 2H), 2.55 (t,  $J$  = 7.6 Hz, 2H), 1.66 – 1.56 (m, 2H), 1.35-1.31 (m, 4H), 0.93 – 0.88 (m, 3H)

**<sup>13</sup>C NMR (100 MHz, CDCl<sub>3</sub>)**  $\delta$  145.6, 139.1, 129.8, 129.4, 128.8 (2C), 128.5 (2C), 127.2, 123.6, 60.5, 51.2, 51.1, 31.6, 27.5, 27.3, 22.5, 14.1

**FTIR (neat):**  $\nu$  = 2929, 2788, 1592, 1454, 1139, 908, 784, 732, 698 cm<sup>-1</sup>

**HRMS (ESI):**  $m/z$  calcd for C<sub>18</sub>H<sub>24</sub>NO: [M+H]<sup>+</sup>: 270.1858; found: 270.1855

5-benzyl-1-methyl-5,6-dihydro-4H-furo[3,4-c]pyrrole **5g**

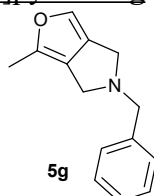

The compound **5g** was obtained from compound **4g** following the **GPVII** on 0.2 mmol scale (43.1 mg). Purification by flash chromatography on silica gel (EtOAc/Cyclohexane: 7/93) afforded **5g** as a colorless oil (m= 29.4 mg, 69% yield).

**<sup>1</sup>H NMR (400 MHz, CDCl<sub>3</sub>)**  $\delta$  7.44 – 7.42 (m, 2H), 7.38 – 7.35 (m, 2H), 7.31 – 7.28 (m, 1H), 6.97 (s, 1H), 3.91 (s, 2H), 3.68 (s, 2H), 3.59 (s, 2H), 2.22 (s, 3H)

**<sup>13</sup>C NMR (100 MHz, CDCl<sub>3</sub>)**  $\delta$  141.1, 139.1, 130.0, 129.6, 128.8 (2C), 128.4 (2C), 127.2, 124.1, 60.4, 51.4, 50.8, 12.7

**FTIR (neat):**  $\nu$  = 2787, 1594, 1453, 1367, 1254, 1087, 926, 841, 732, 697 cm<sup>-1</sup>

**HRMS (ESI):**  $m/z$  calcd for C<sub>14</sub>H<sub>16</sub>NO: [M+H]<sup>+</sup>: 214.1232; found: 214.1230

5-benzyl-1-(4-chlorophenyl)-5,6-dihydro-4H-furo[3,4-c]pyrrole **2l**

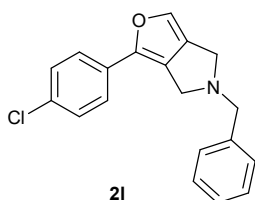

The compound **21** was obtained from compound **11** following the **GPVII** on 0.4 mmol scale (124.7 mg). Purification by flash chromatography on silica gel (EtOAc/Cyclohexane: 5/95 to 10/90) afforded **21** as a yellow solid (m= 97.8 mg, 79% yield).

**<sup>1</sup>H NMR (400 MHz, CDCl<sub>3</sub>)**  $\delta$  7.46 – 7.44 (m, 2H), 7.42 – 7.37 (m, 4H), 7.34 – 7.30 (m, 3H), 7.13 (s, 1H), 3.97 (s, 2H), 3.88 (s, 2H), 3.76 (s, 2H)

**<sup>13</sup>C NMR (100 MHz, CDCl<sub>3</sub>)**  $\delta$  142.4, 138.9, 132.3, 131.4, 131.3, 129.5, 128.9 (2C), 128.8 (2C), 128.6 (2C), 127.3, 126.0, 125.1 (2C), 60.3, 52.1, 51.0

**FTIR (neat):**  $\nu$  = 2792, 1489, 1091, 968, 905, 828, 733, 698 cm<sup>-1</sup>

**HRMS (ESI):**  $m/z$  calcd for C<sub>19</sub>H<sub>17</sub>NOCl: [M+H]<sup>+</sup>: 310.0999; found: 310.0998

(S)-5-benzyl-1-(2,6-dimethylhept-5-en-1-yl)-5,6-dihydro-4H-furo[3,4-c]pyrrole **13b**

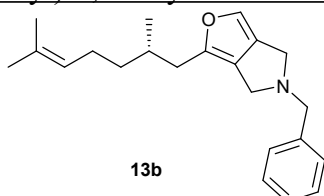

The compound **13b** was obtained from compound **27** and **20** following the **GPVIII** on 0.4 mmol scale (72.1 mg). Purification by flash chromatography on silica gel (EtOAc/Cyclohexane: 5/95) afforded **13b** as a colorless oil (m= 80.2 mg, 62% yield).

**<sup>1</sup>H NMR (400 MHz, CDCl<sub>3</sub>)**  $\delta$  7.46 – 7.43 (m, 2H), 7.39 – 7.36 (m, 2H), 7.33 – 7.28 (m, 1H), 7.00 (s, 1H), 5.15 – 5.12 (m, 1H), 3.93 (s, 2H), 3.71 (s, 2H), 3.64 (s, 2H), 2.58 (dd,  $J$  = 14.8, 7.6 Hz, 1H), 2.41 (dd,  $J$  = 14.8, 7.6 Hz, 1H), 2.10 – 1.98 (m, 2H), 1.88 – 1.80 (m, 1H), 1.73 (s, 3H), 1.64 (s, 3H), 1.46 – 1.37 (m, 1H), 1.27 - 1.19 (m, 1H), 0.94 (d,  $J$  = 6.8 Hz, 3H)

**<sup>13</sup>C NMR (100 MHz, CDCl<sub>3</sub>)**  $\delta$  144.6, 139.0, 131.2, 129.9, 129.3, 128.8 (2C), 128.4 (2C), 127.1, 124.7, 124.4, 60.4, 51.3, 51.1, 36.7, 34.8, 32.3, 25.8, 25.6, 19.8, 17.7

**FTIR (neat):**  $\nu$  = 2913, 1454, 1376, 906, 728, 698 cm<sup>-1</sup>

**HRMS (ESI):**  $m/z$  calcd for C<sub>22</sub>H<sub>30</sub>NO: [M+H]<sup>+</sup>: 324.2327; found: 324.2326

$[\alpha]_D^{25}$  = -0.83 (c = 0.48, CHCl<sub>3</sub>)

ethyl 5-benzyl-3-phenyl-5,6-dihydro-4H-furo[3,4-c]pyrrole-4-carboxylate **2m**

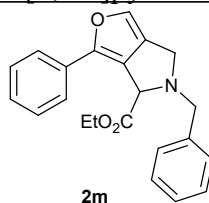

The compound **2m** was obtained from compound **1m** following the **GPVII** on 0.4 mmol scale (139.8 mg). Purification by flash chromatography on silica gel (EtOAc/Cyclohexane: 5/95 to 7/93) afforded **2m** as a yellow solid (m= 87.5 mg, 63% yield).

**<sup>1</sup>H NMR (400 MHz, CDCl<sub>3</sub>)**  $\delta$  7.68 – 7.65 (m, 2H), 7.44 – 7.41 (m, 2H), 7.40 – 7.35 (m, 4H), 7.33 – 7.29 (m, 1H), 7.27 – 7.23 (m, 1H), 7.17 (s, 1H), 4.85 (s, 1H), 4.21 - 4.07 (m, 5H), 3.88 (d,  $J$  = 11.6 Hz, 1H), 1.18 (t,  $J$  = 7.0 Hz, 3H)

**<sup>13</sup>C NMR (100 MHz, CDCl<sub>3</sub>)**  $\delta$  171.0, 144.8, 138.5, 131.4, 131.1, 130.3, 128.8 (2C), 128.6 (2C), 128.5 (2C), 127.4, 127.3, 124.6 (2C), 124.5, 63.6, 61.0, 56.3, 49.5, 14.3

**FTIR (neat):**  $\nu = 1728, 1495, 1179, 1027, 906, 727, 692 \text{ cm}^{-1}$

**HRMS (ESI):**  $m/z$  calcd for  $\text{C}_{22}\text{H}_{22}\text{NO}_3$ :  $[\text{M}+\text{H}]^+$ : 348.1600; found: 348.1598

4-phenyl-1*H*,3*H*-furo[3,4-*c*]furan **2n**

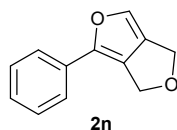

The compound **2n** was obtained from compound **1n** following the **GPVII** on 0.4 mmol scale (75.3 mg). Purification by flash chromatography on silica gel (EtOAc/Cyclohexane: 5/95 to 7/93) afforded **2n** as a yellow solid ( $m = 38.4 \text{ mg}$ , 52% yield).

**$^1\text{H}$  NMR (400 MHz,  $\text{CDCl}_3$ )**  $\delta$  7.46 – 7.37 (m, 4H), 7.27 – 7.23 (m, 1H), 7.15 (s, 1H), 5.02 (s, 2H), 4.86 (s, 2H)

**$^{13}\text{C}$  NMR (100 MHz,  $\text{CDCl}_3$ )**  $\delta$  142.7, 132.5, 130.6, 130.2, 128.9 (2C), 127.1, 126.6, 123.9 (2C), 66.5, 65.5

**FTIR (neat):**  $\nu = 2863, 2251, 1495, 1049, 905, 725, 690 \text{ cm}^{-1}$

**HRMS (ESI):**  $m/z$  calcd for  $\text{C}_{12}\text{H}_{10}\text{O}_2\text{Na}^+$ :  $[\text{M}+\text{Na}]^+$ : 209.0578; found: 209.0575

5-benzyl-1-phenethyl-5,6-dihydro-4*H*-furo[3,4-*c*]pyrrole **5f**

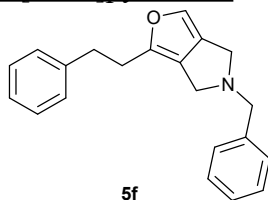

The compound **5f** was obtained from compound **4f** following the **GPVII** on 0.4 mmol scale (122.2 mg). Purification by flash chromatography on silica gel (EtOAc/Cyclohexane: 5/95) afforded **5f** as a yellow solid ( $m = 88.6 \text{ mg}$ , 73% yield).

**$^1\text{H}$  NMR (400 MHz,  $\text{CDCl}_3$ )**  $\delta$  7.41 – 7.34 (m, 4H), 7.31 – 7.27 (m, 3H), 7.23 – 7.16 (m, 3H), 7.00 (s, 1H), 3.87 (s, 2H), 3.66 (s, 2H), 3.48 (s, 2H), 2.95 – 2.85 (m, 4H)

**$^{13}\text{C}$  NMR (100 MHz,  $\text{CDCl}_3$ )**  $\delta$  144.3, 141.3, 139.1, 130.1, 129.5, 128.9 (2C), 128.6 (2C), 128.5 (2C), 128.4 (2C), 127.2, 126.2, 124.3, 60.4, 51.2, 50.9, 34.1, 29.4

**FTIR (neat):**  $\nu = 2925, 2792, 1454, 908, 731, 699 \text{ cm}^{-1}$

**HRMS (ESI):**  $m/z$  calcd for  $\text{C}_{21}\text{H}_{22}\text{NO}$ :  $[\text{M}+\text{H}]^+$ : 304.1701; found: 304.1697

1-phenyl-5-tosyl-5,6-dihydro-4*H*-furo[3,4-*c*]pyrrole **2j**

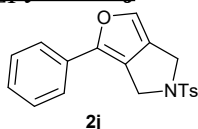

The compound **2j** was obtained from compound **1j** following the **GPVII** on 0.2 mmol scale (68.3 mg). Purification by flash chromatography on silica gel (EtOAc/Cyclohexane: 5/95 to 15/85) afforded **2j** as a white solid ( $m = 35.9 \text{ mg}$ , 53% yield).

**$^1\text{H}$  NMR (300 MHz,  $\text{CDCl}_3$ )**  $\delta$  7.81 – 7.76 (m, 2H), 7.45 – 7.32 (m, 6H), 7.28 – 7.23 (m, 1H), 7.14 (s, 1H), 4.58 (s, 2H), 4.41 (s, 2H), 2.41 (s, 3H)

**$^{13}\text{C}$  NMR (100 MHz,  $\text{CDCl}_3$ )**  $\delta$  144.3, 144.0, 134.2, 131.9, 130.1, 130.0 (2C), 129.0 (2C), 127.7, 127.6 (2C), 127.5, 124.0 (2C), 121.6, 47.6, 46.3, 21.7

**FTIR (neat):**  $\nu = 1343, 1160, 907, 814, 728, 659 \text{ cm}^{-1}$

**HRMS (ESI):**  $m/z$  calcd for  $\text{C}_{19}\text{H}_{18}\text{NO}_3\text{S}$ :  $[\text{M}+\text{H}]^+$ : 340.1007; found: 340.1005

dimethyl 3-phenyl-6,7-dihydroisobenzofuran-5,5(4H)-dicarboxylate **2f**

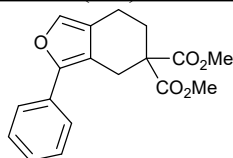

**2f**

The compound **2f** was obtained from compound **1f** following the **GPVII** on 0.4 mmol scale (126.5 mg). Purification by flash chromatography on silica gel (EtOAc/Cyclohexane: 2/98 to 4/96) afforded **2f** as a white solid (m= 93.0 mg, 74% yield).

**<sup>1</sup>H NMR (400 MHz, CDCl<sub>3</sub>)**  $\delta$  7.63 – 7.61 (m, 2H), 7.42 – 7.38 (m, 2H), 7.27 – 7.22 (m, 1H), 7.20 (s, 1H), 3.75 (s, 6H), 3.35 (s, 2H), 2.66 (t,  $J$  = 6.6 Hz, 2H), 2.31 (t,  $J$  = 6.6 Hz, 2H)

**<sup>13</sup>C NMR (100 MHz, CDCl<sub>3</sub>)**  $\delta$  171.8 (2C), 147.5, 136.5, 131.8, 128.7 (2C), 126.8, 124.7 (2C), 121.4, 115.2, 54.2, 53.0 (2C), 28.6, 28.5, 17.0

**FTIR (neat):**  $\nu$  = 2954, 1733, 1248, 905, 728, 692 cm<sup>-1</sup>

**HRMS (ESI):**  $m/z$  calcd for C<sub>18</sub>H<sub>19</sub>O<sub>5</sub>: [M+H]<sup>+</sup>: 315.1232; found: 315.1228

## 5. $^1\text{H}$ and $^{13}\text{C}$ NMR spectra

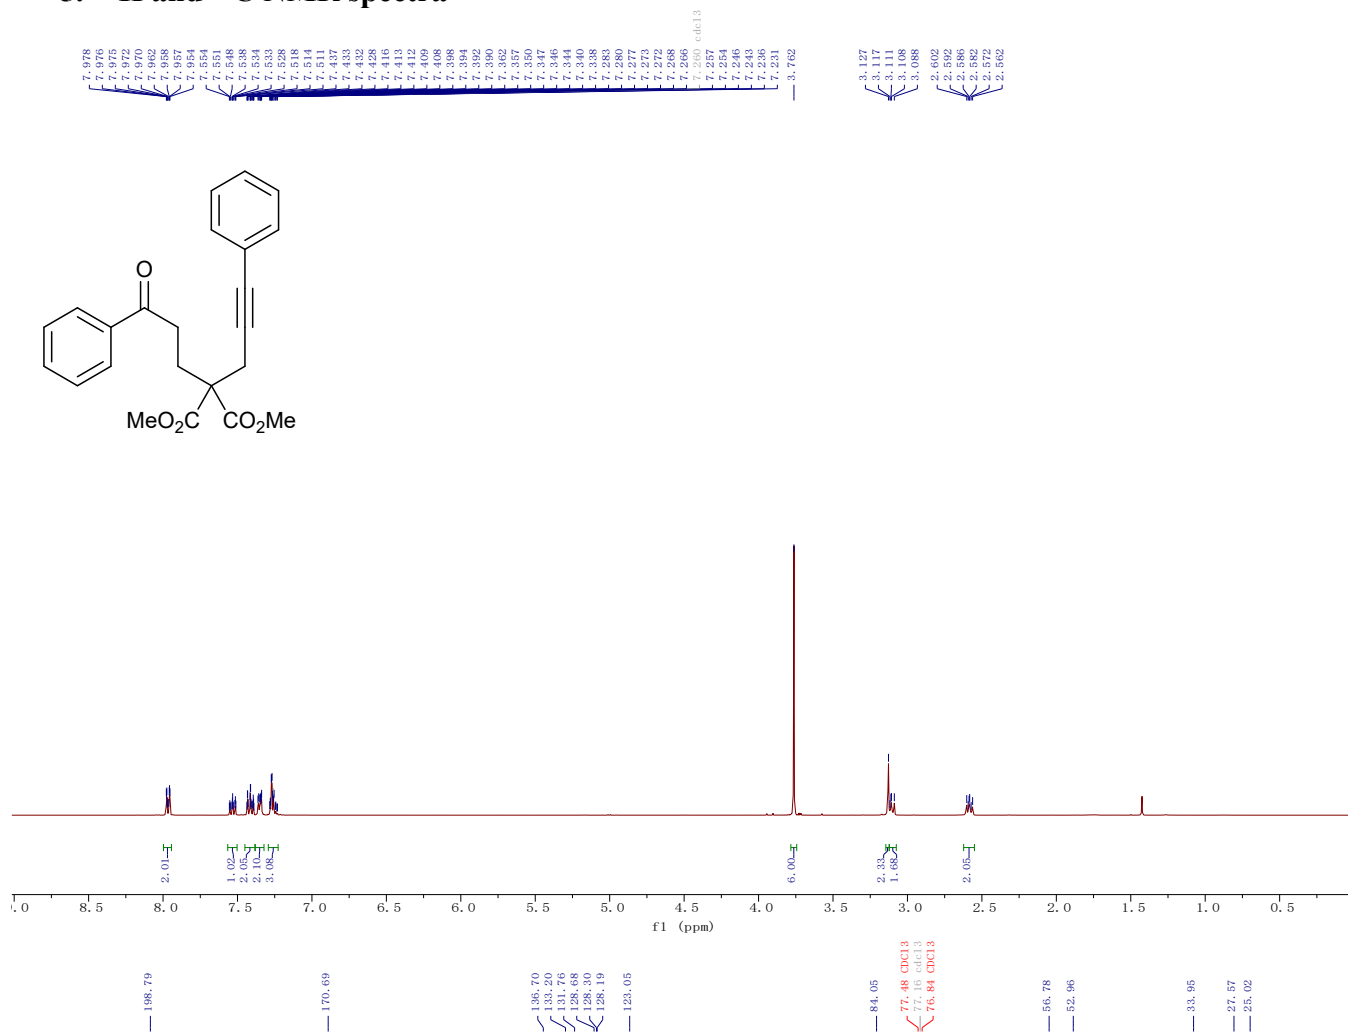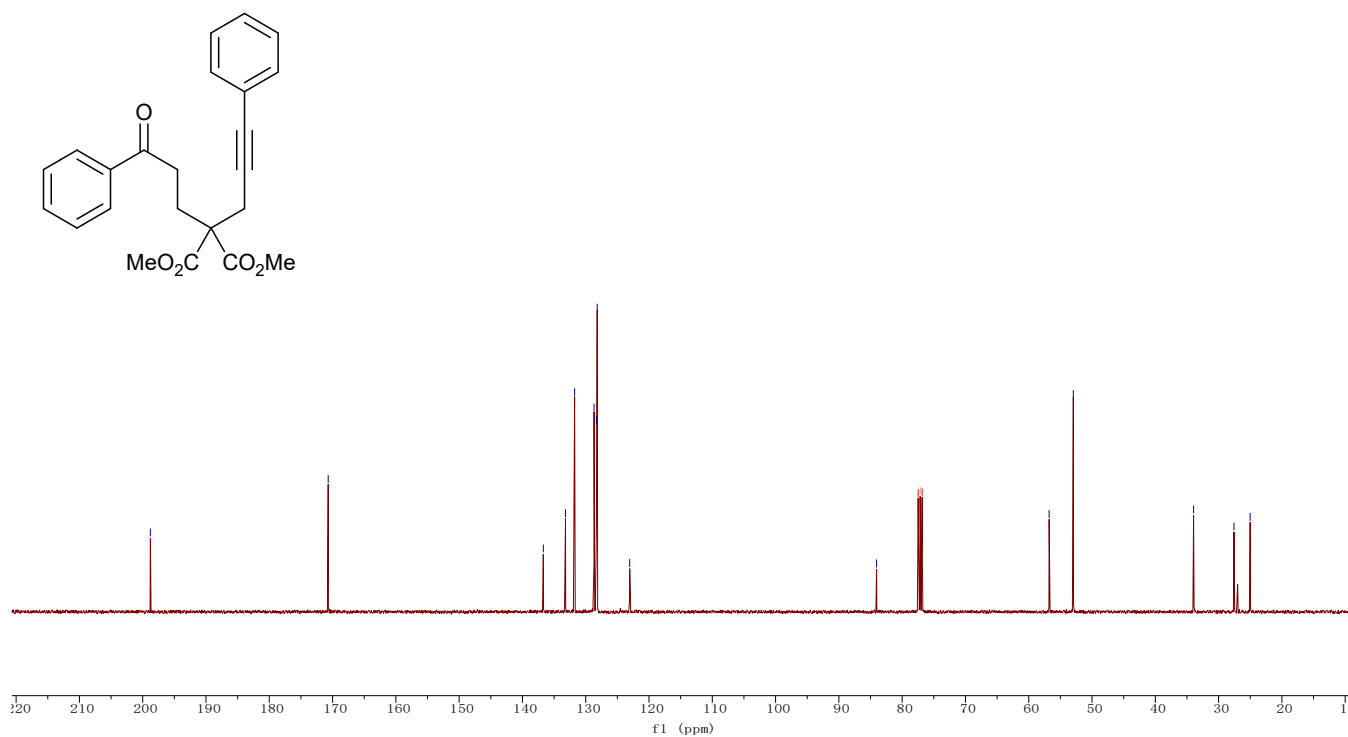



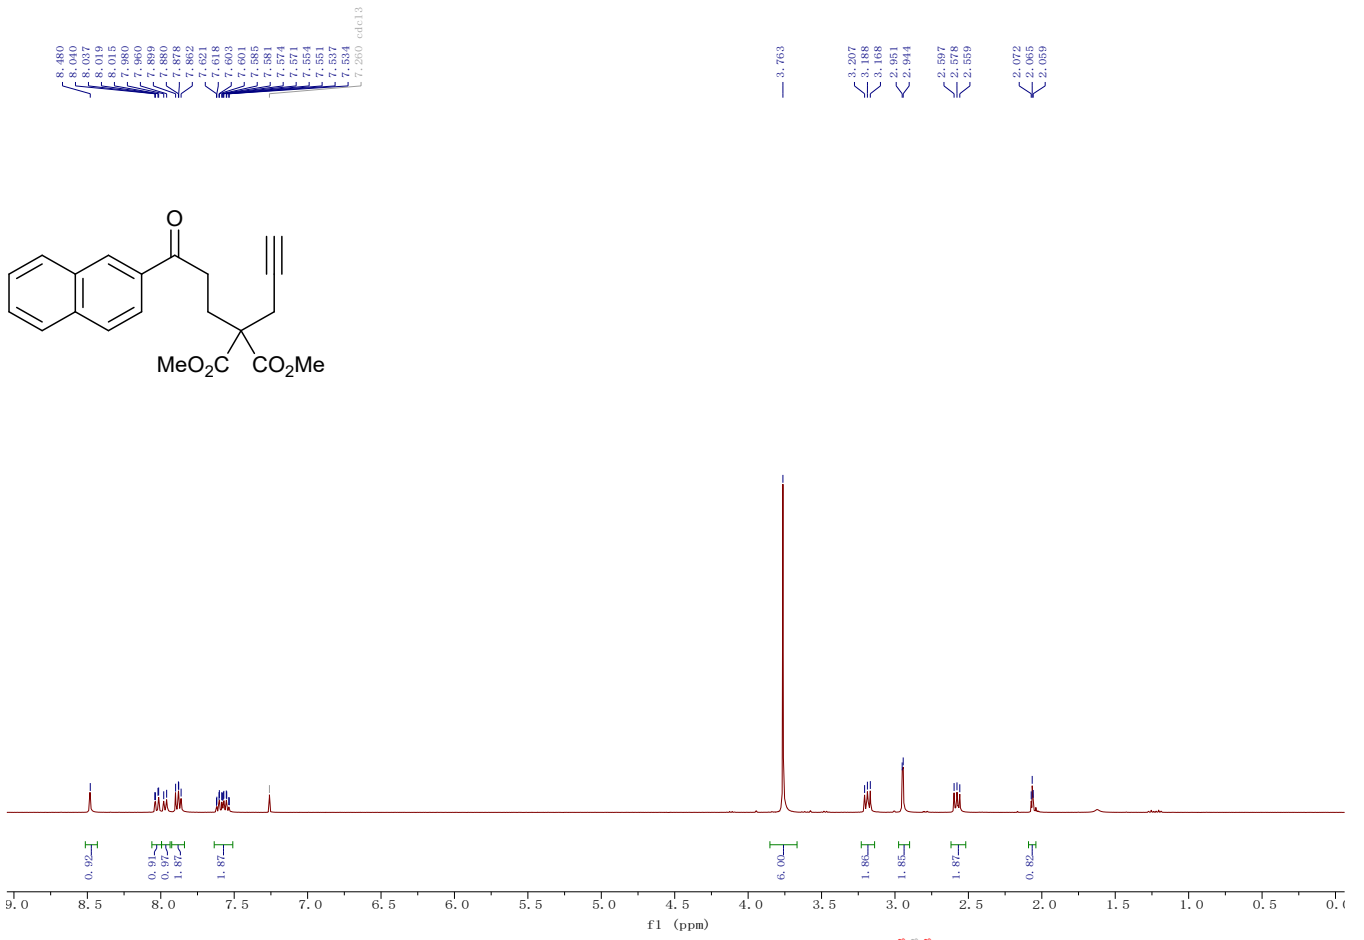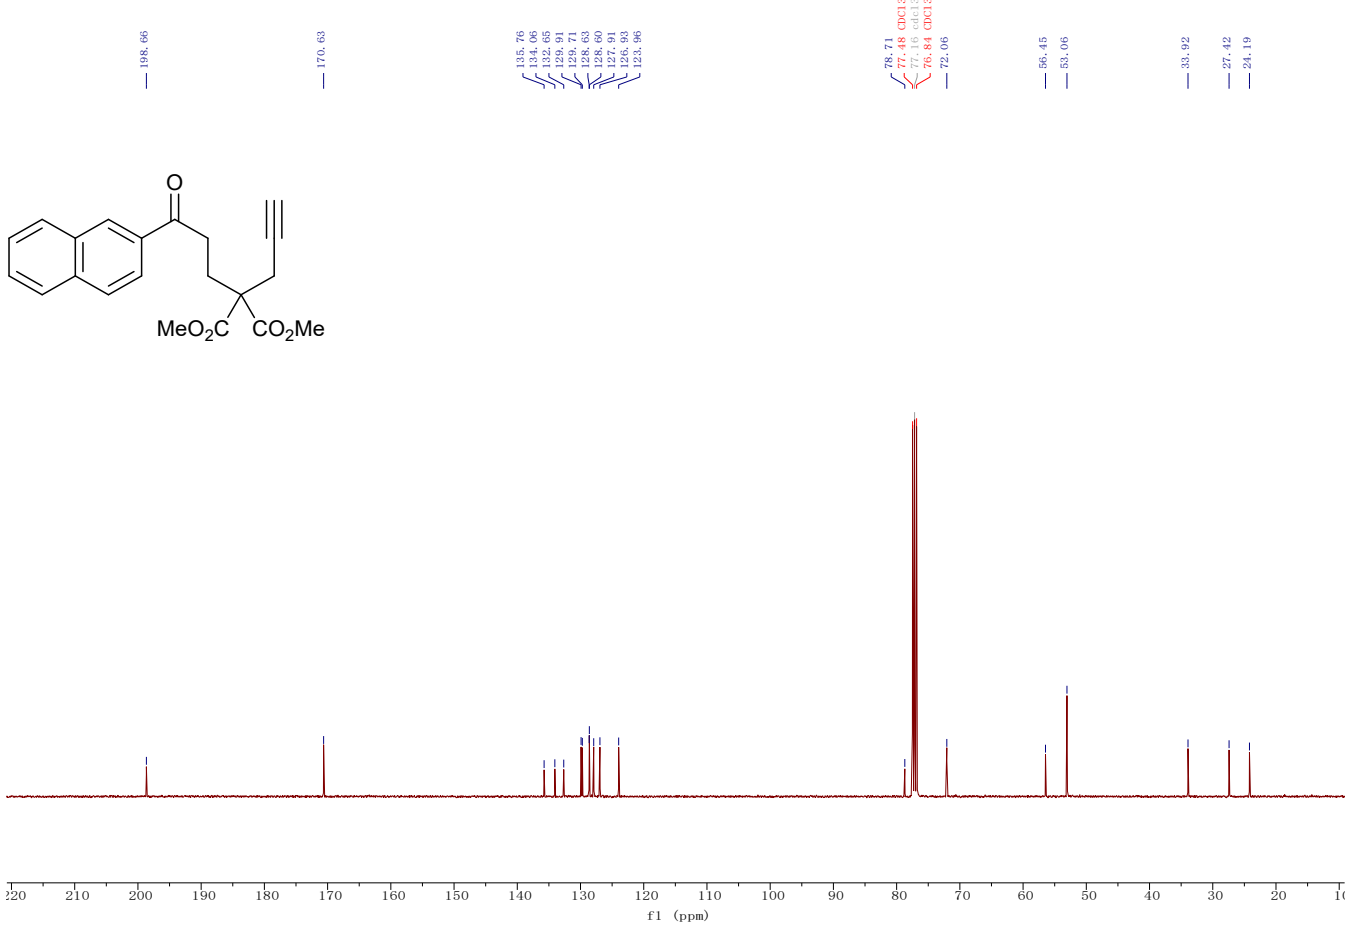

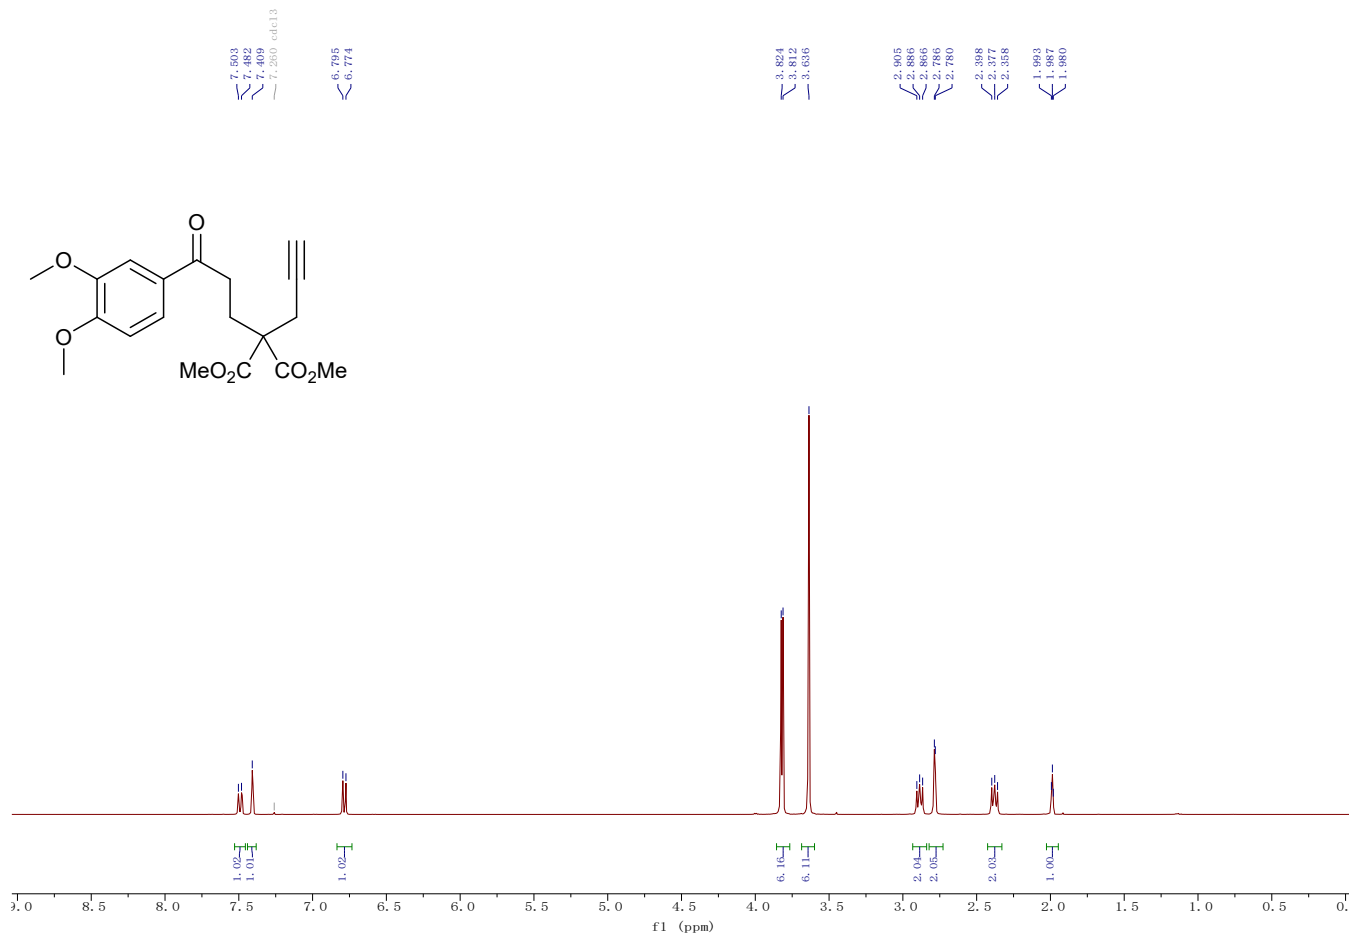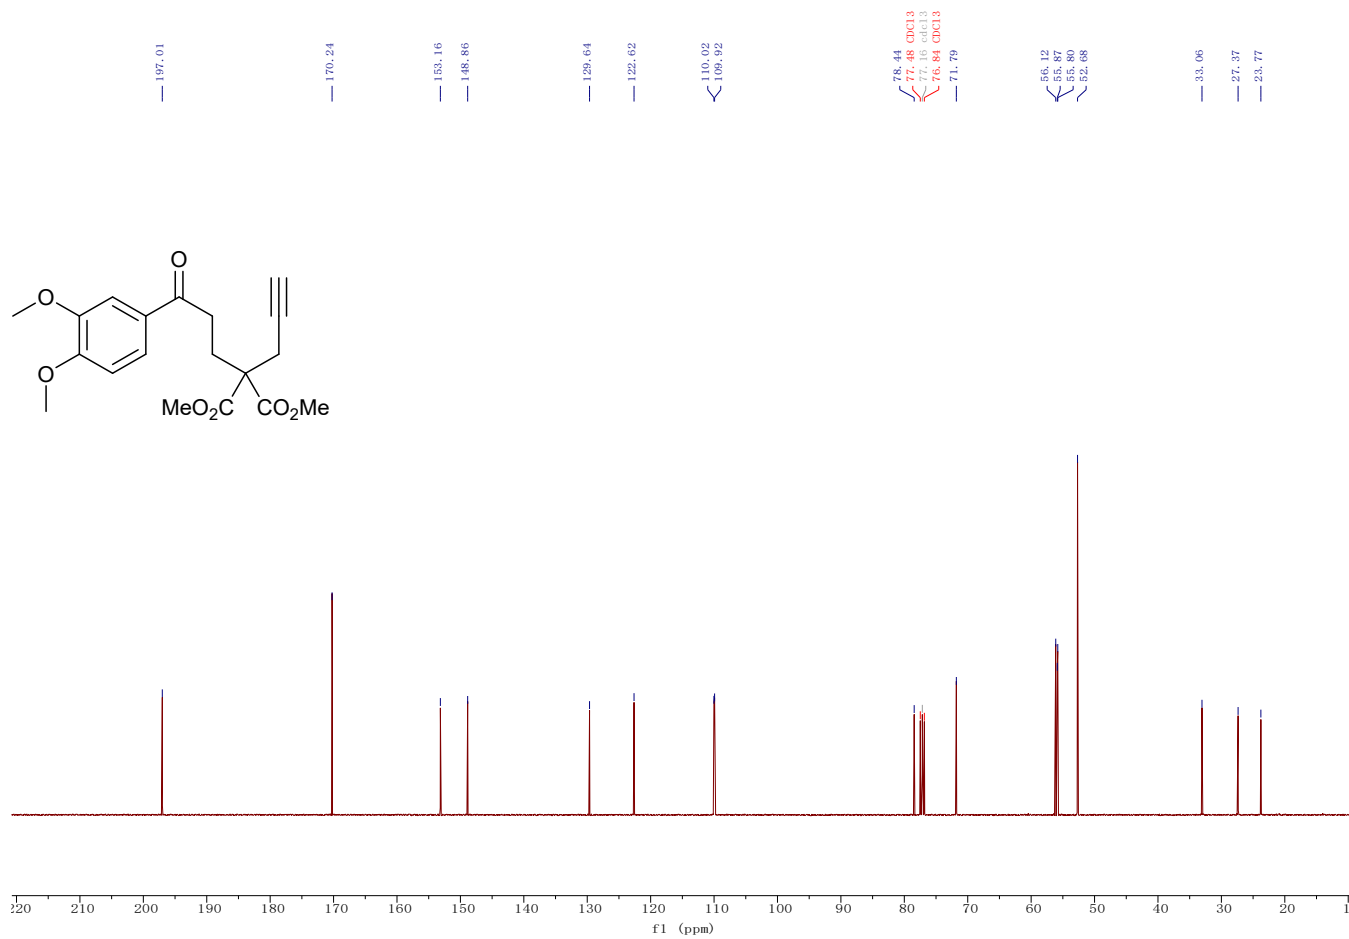

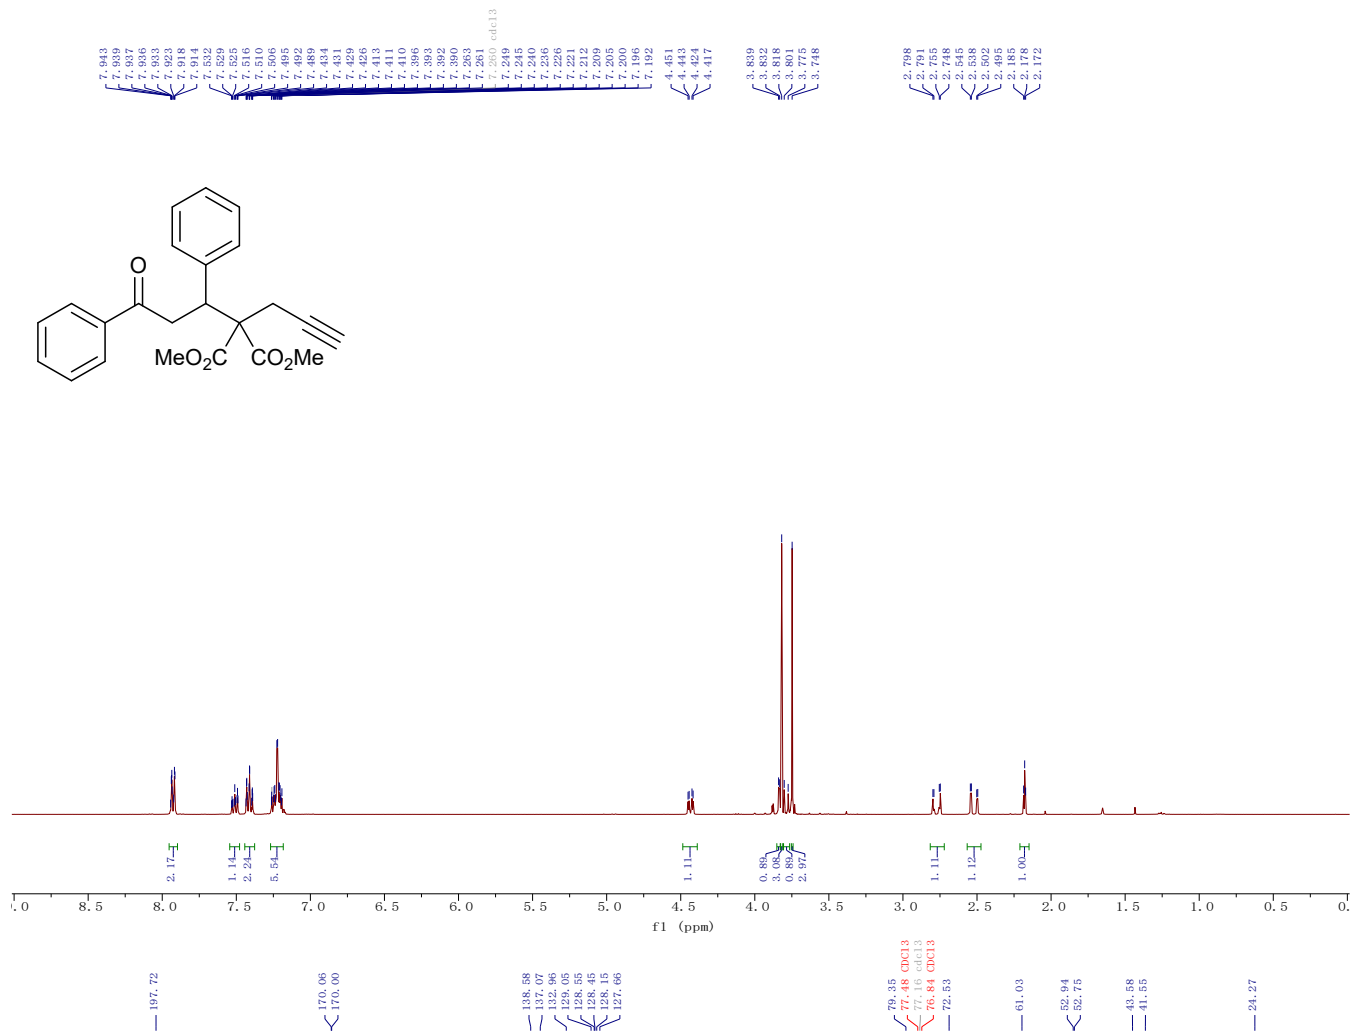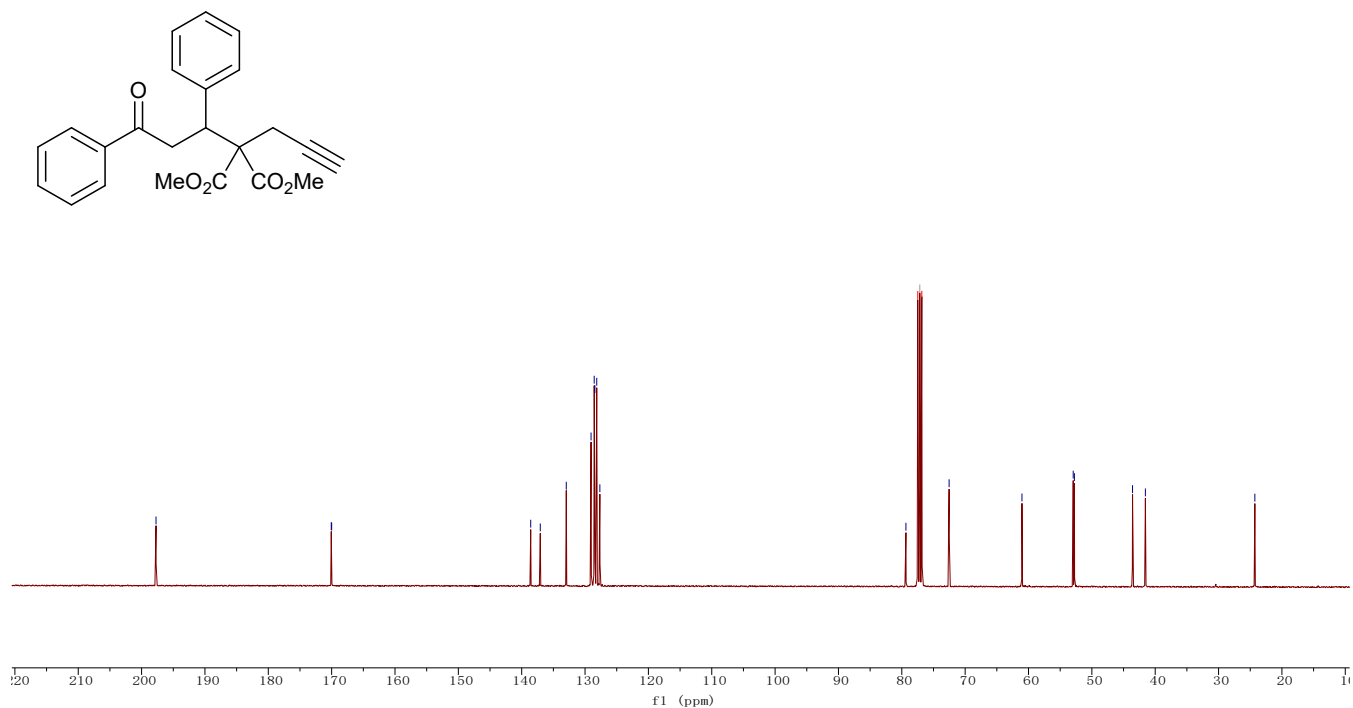

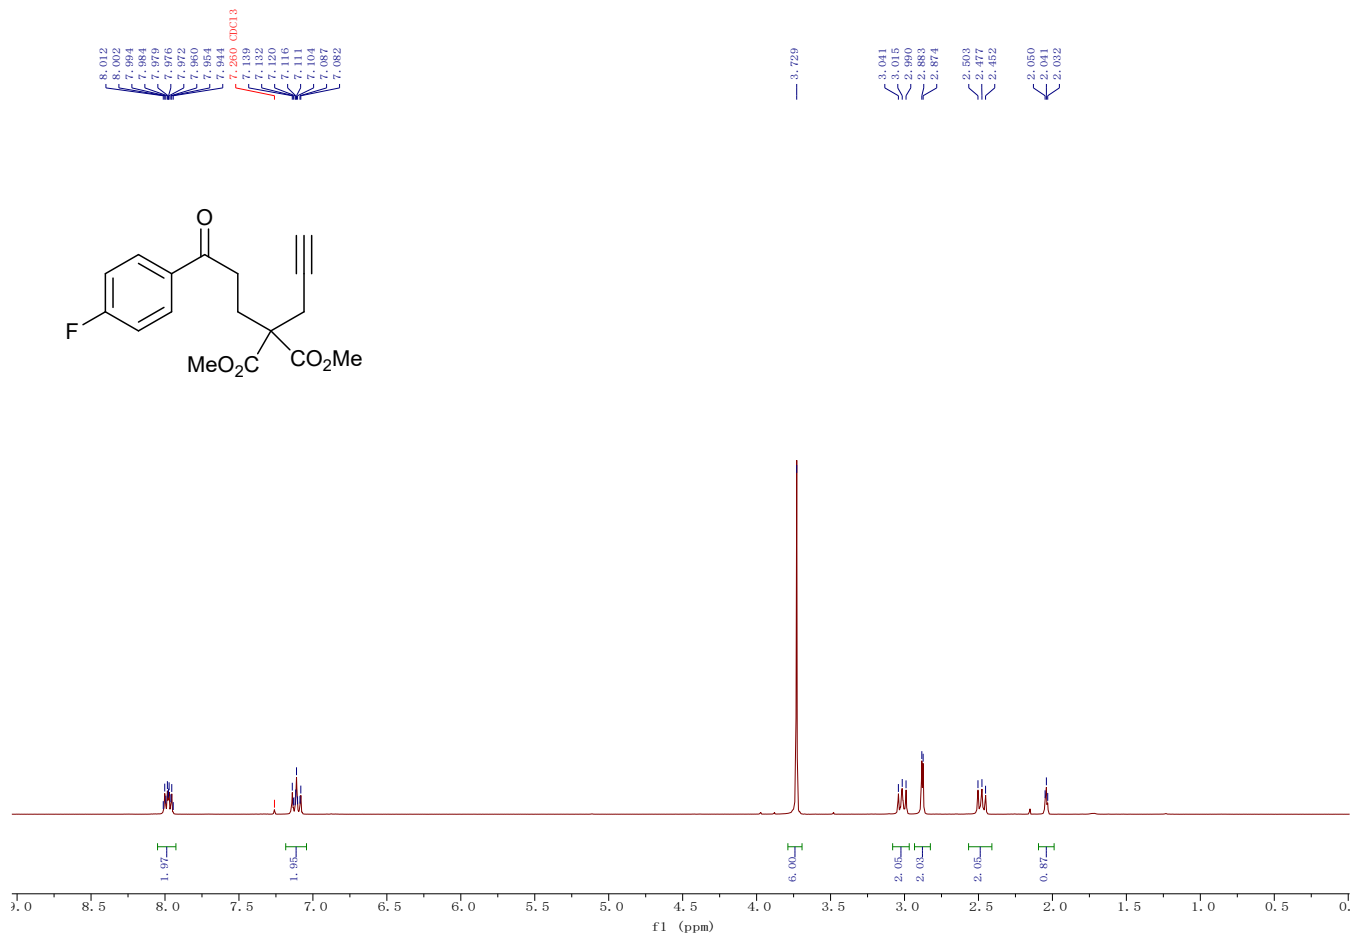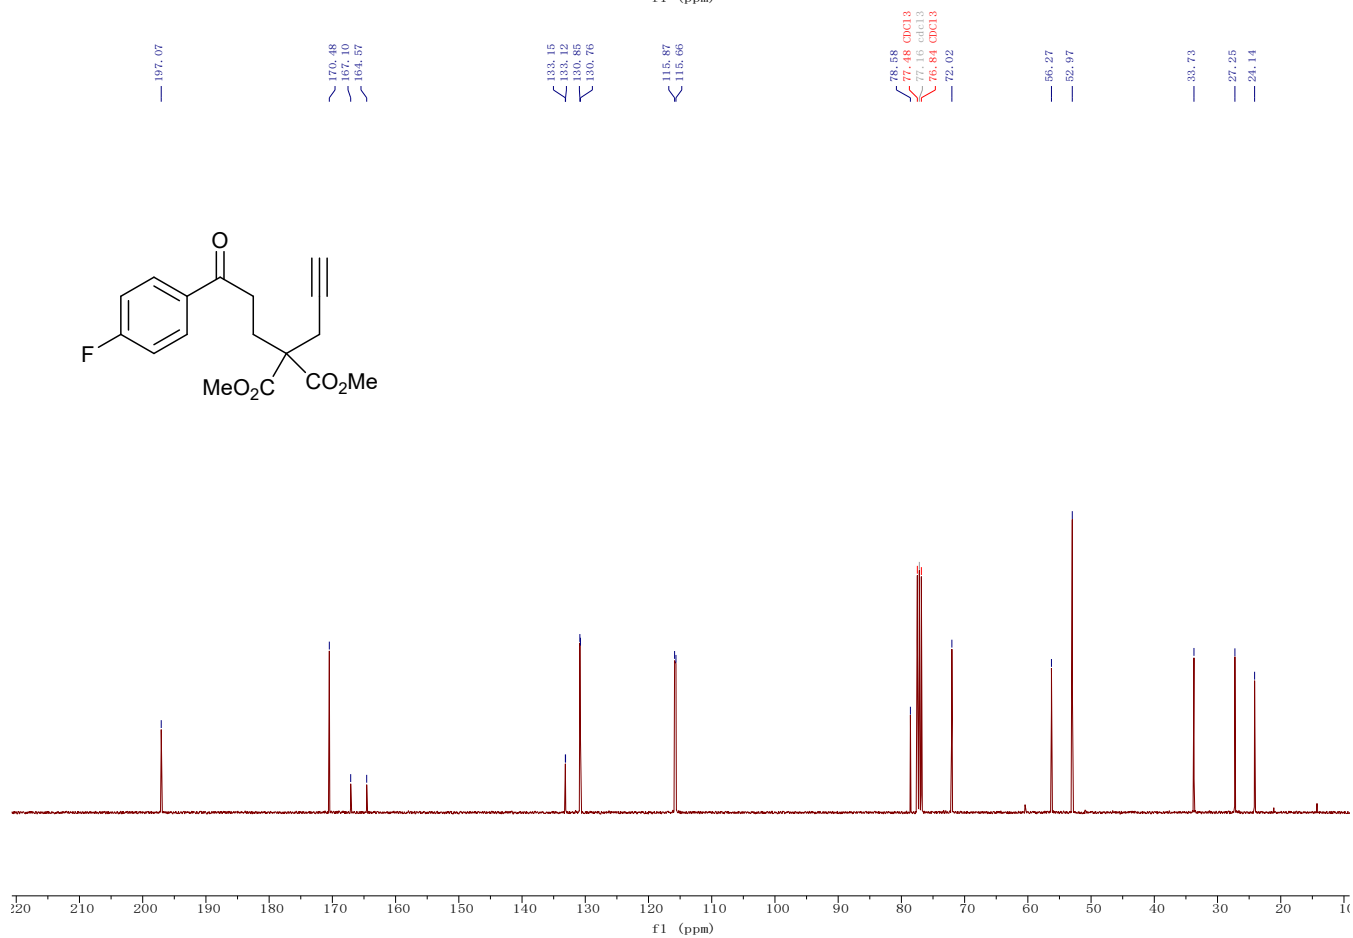

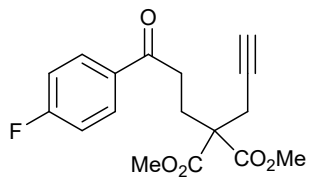

-105.147

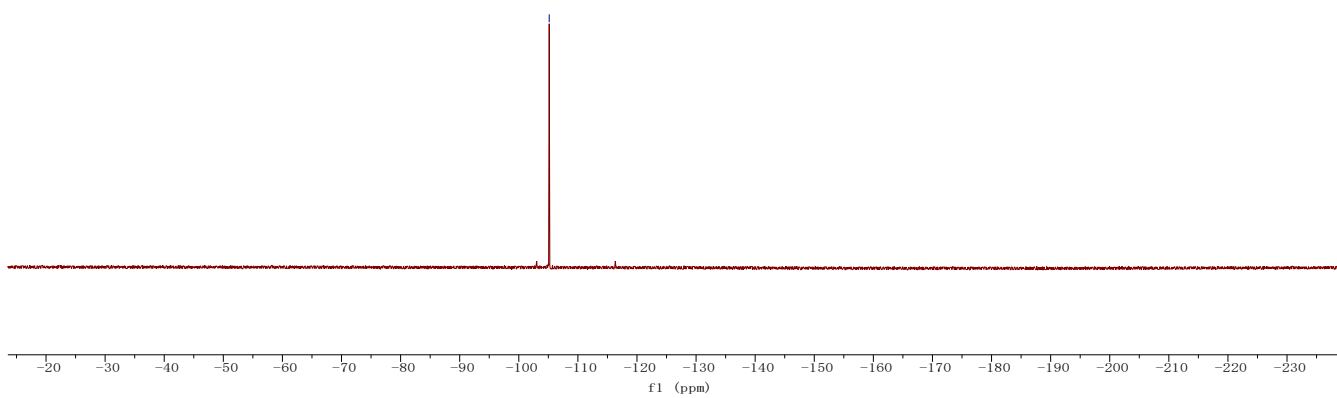

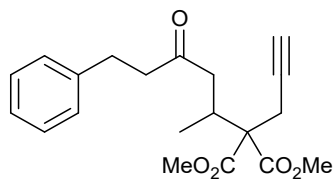

7.286  
7.282  
7.278  
7.273  
7.270  
7.268  
7.260 CDCl3  
7.254  
7.249  
7.199  
7.189  
7.186  
7.181  
7.175  
7.170  
7.168  
7.165  
7.161  
7.158

3.726  
3.038  
3.021  
3.021  
3.016  
3.012  
3.007  
3.004  
2.999  
2.995  
2.990  
2.987  
2.982  
2.978  
2.973  
2.961  
2.955  
2.941  
2.934  
2.919  
2.904  
2.899  
2.896  
2.892  
2.888  
2.884  
2.857  
2.852  
2.846  
2.841  
2.819  
2.813  
2.808  
2.801  
2.797  
2.794  
2.783  
2.776  
2.772  
2.765  
2.755  
2.746  
2.740  
2.721  
2.702  
2.692  
2.679  
2.659  
2.266  
2.240  
2.234  
2.158  
2.031  
2.024  
0.888  
0.881

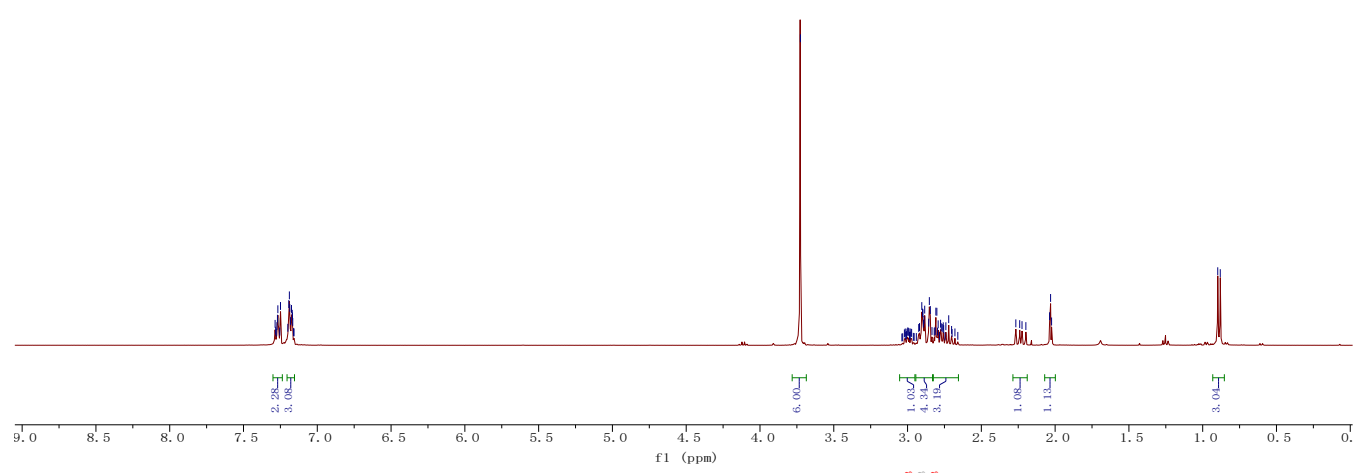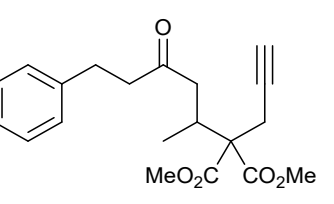

208.44  
170.35  
169.98  
141.13  
128.65  
128.44  
126.17  
79.10 CDCl3  
77.48 CDCl3  
76.84 CDCl3  
71.78  
60.35  
52.76  
52.62  
46.66  
44.60  
31.92  
29.89  
23.04  
15.67

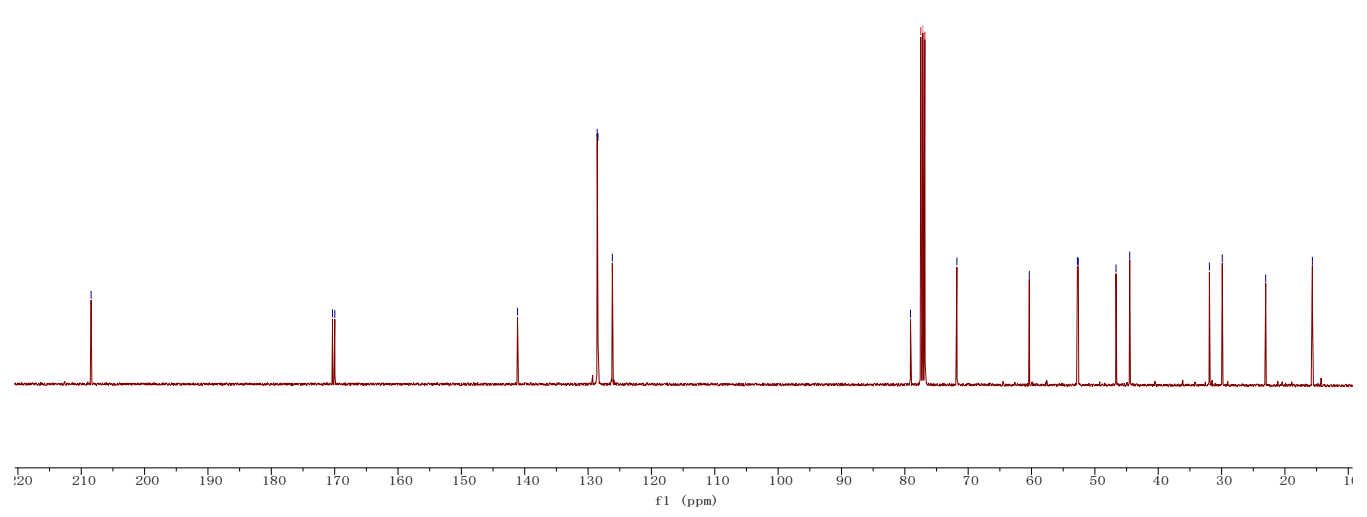

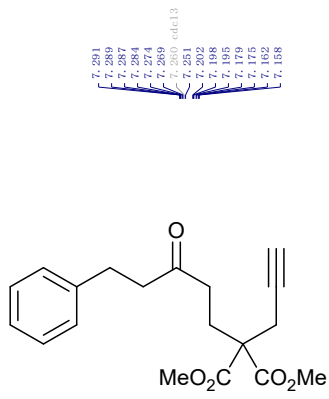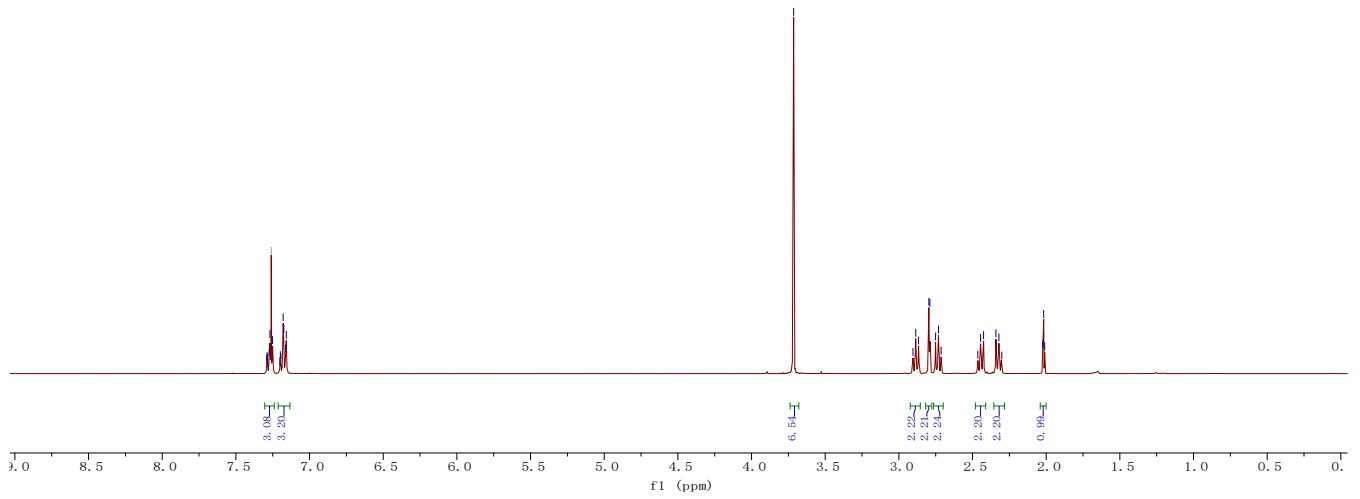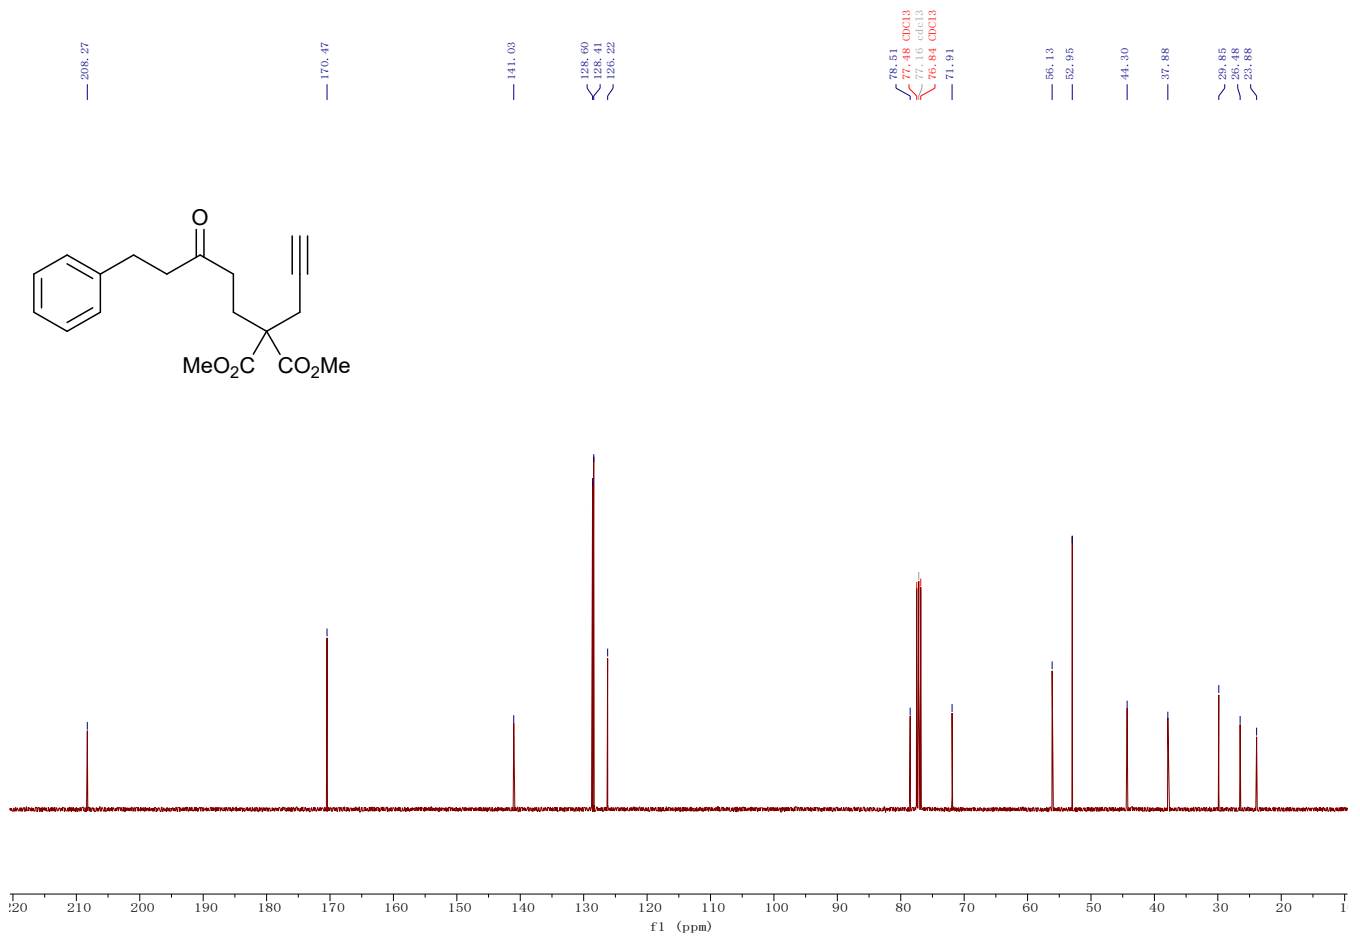

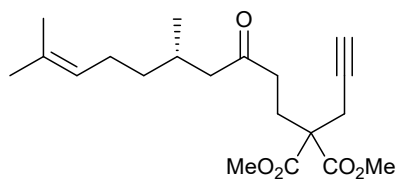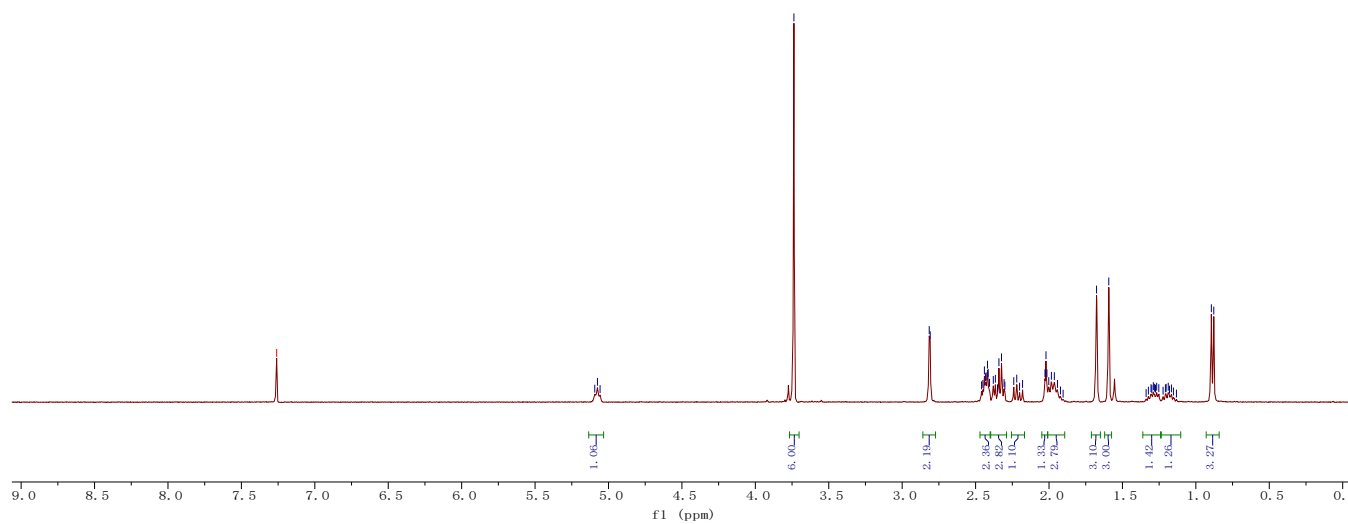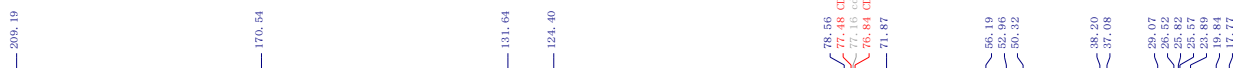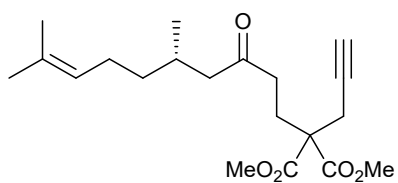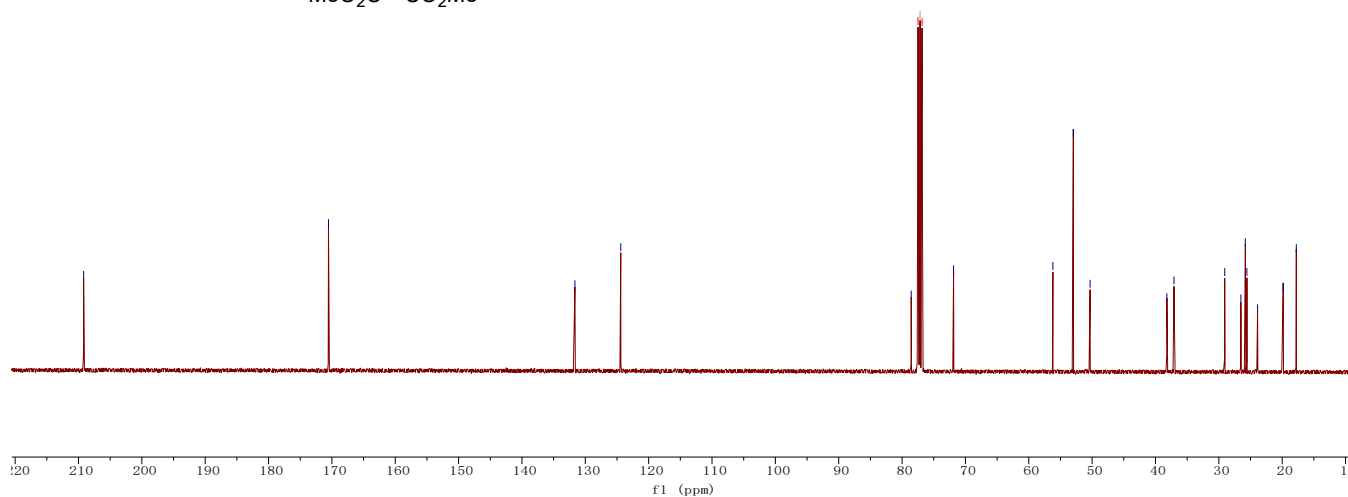





7.260 cdcl3

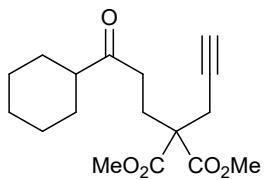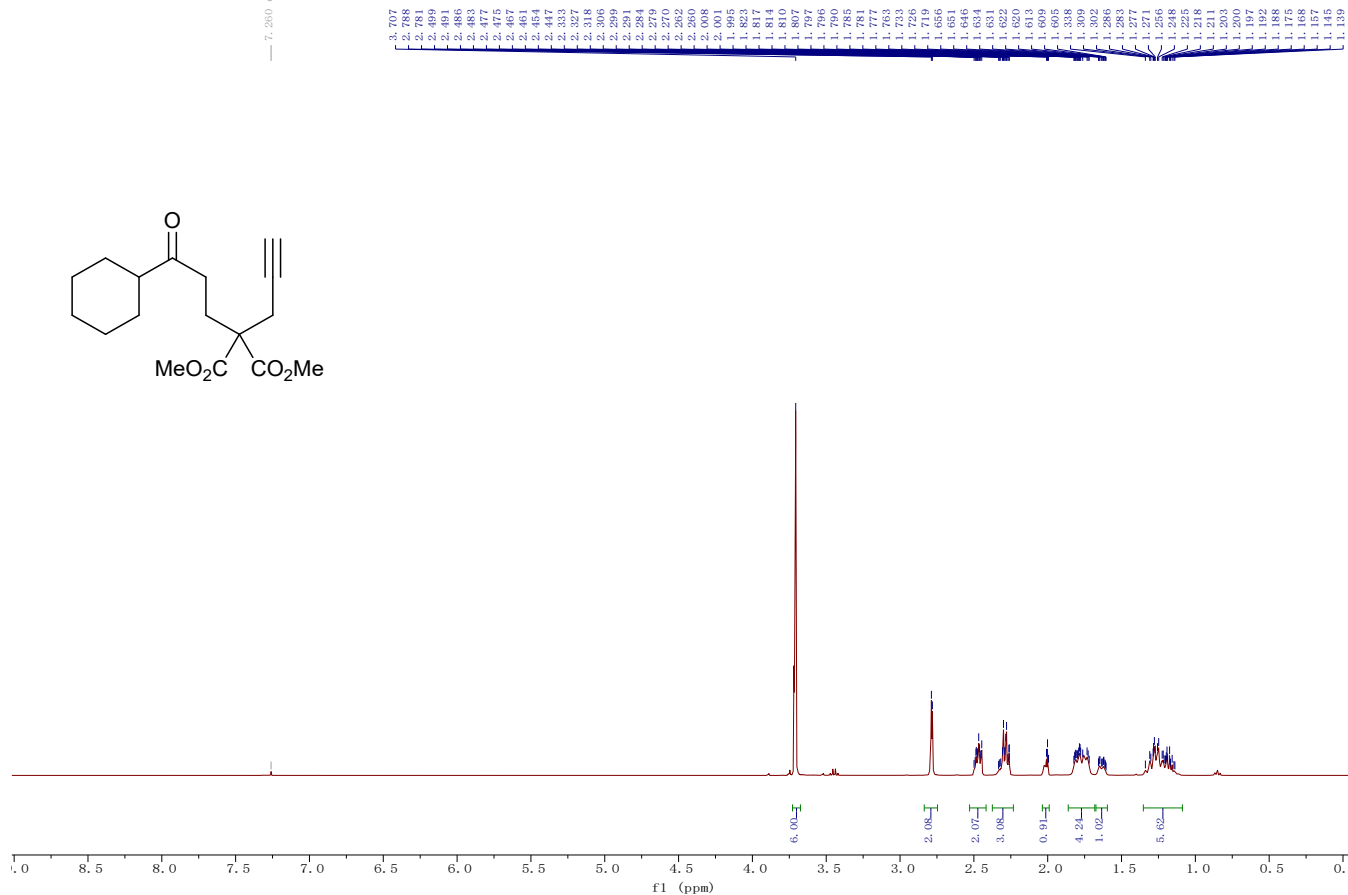

212.28

170.51

78.55  
77.48  
76.84  
71.80

56.19  
52.88  
50.04

35.43

28.56  
26.80  
25.71  
23.87

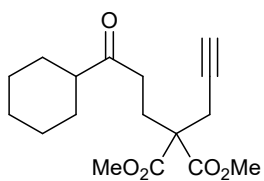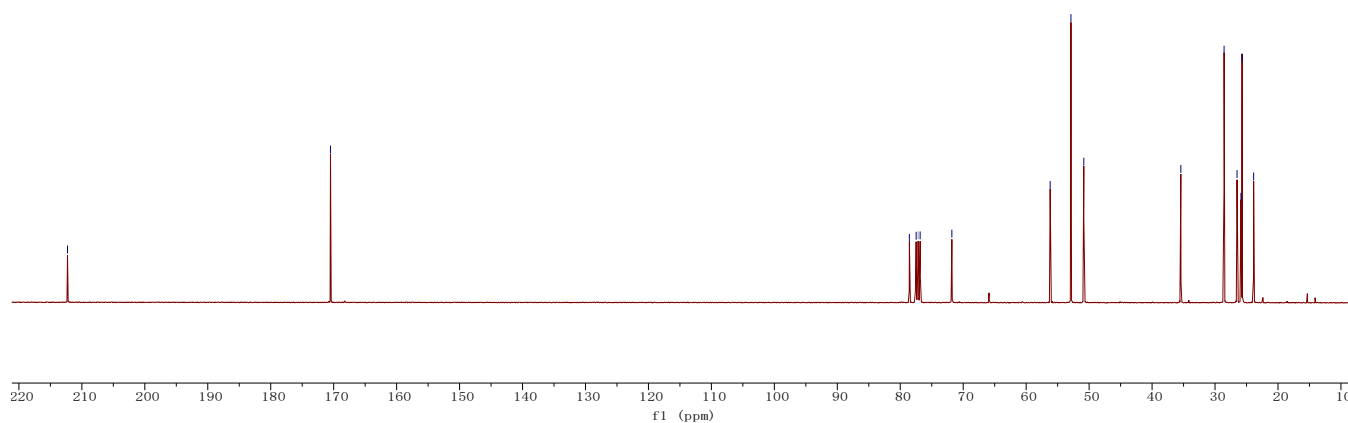

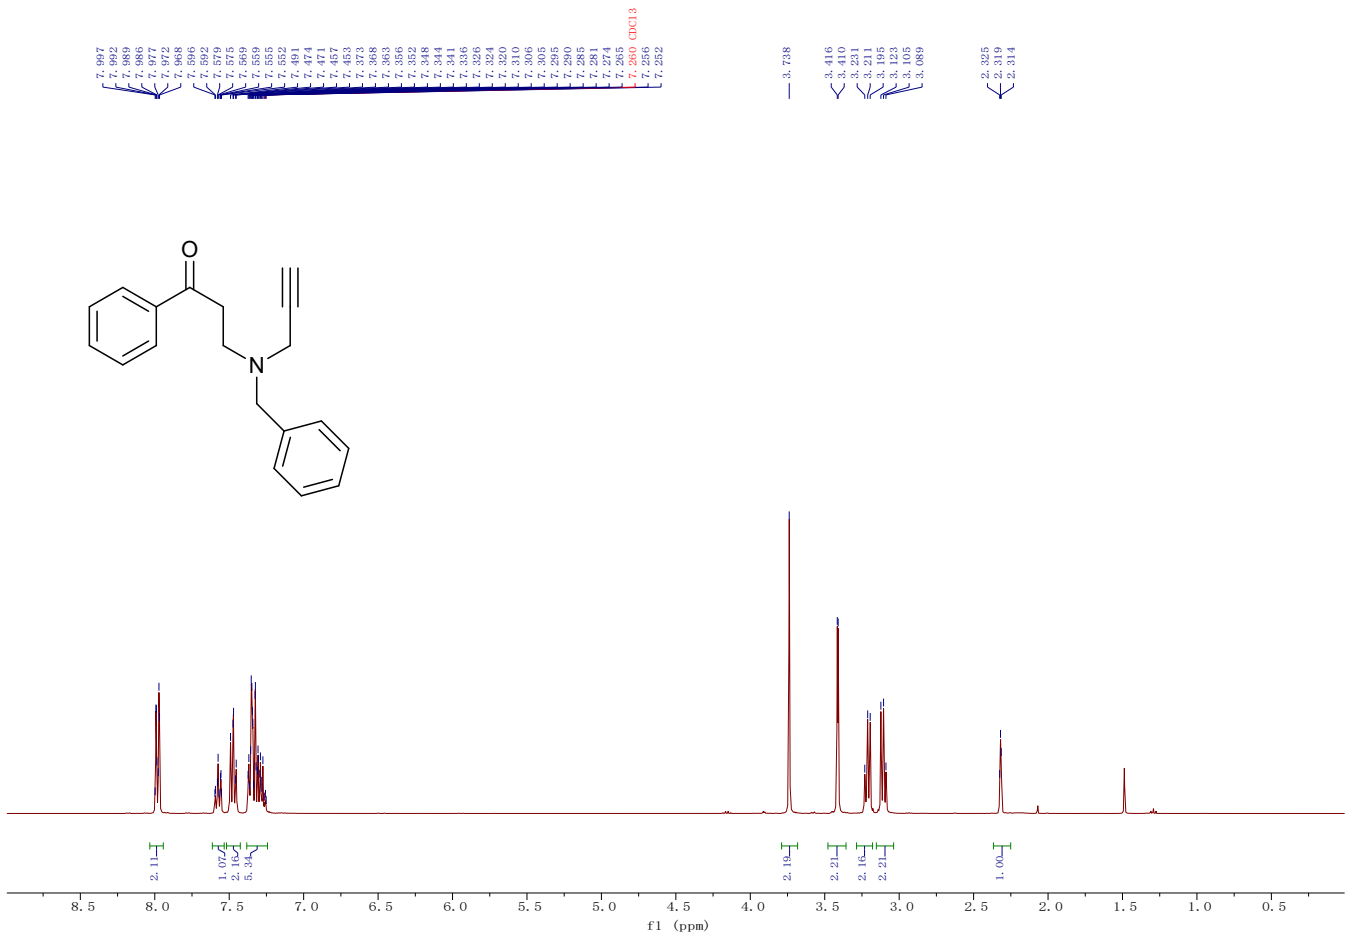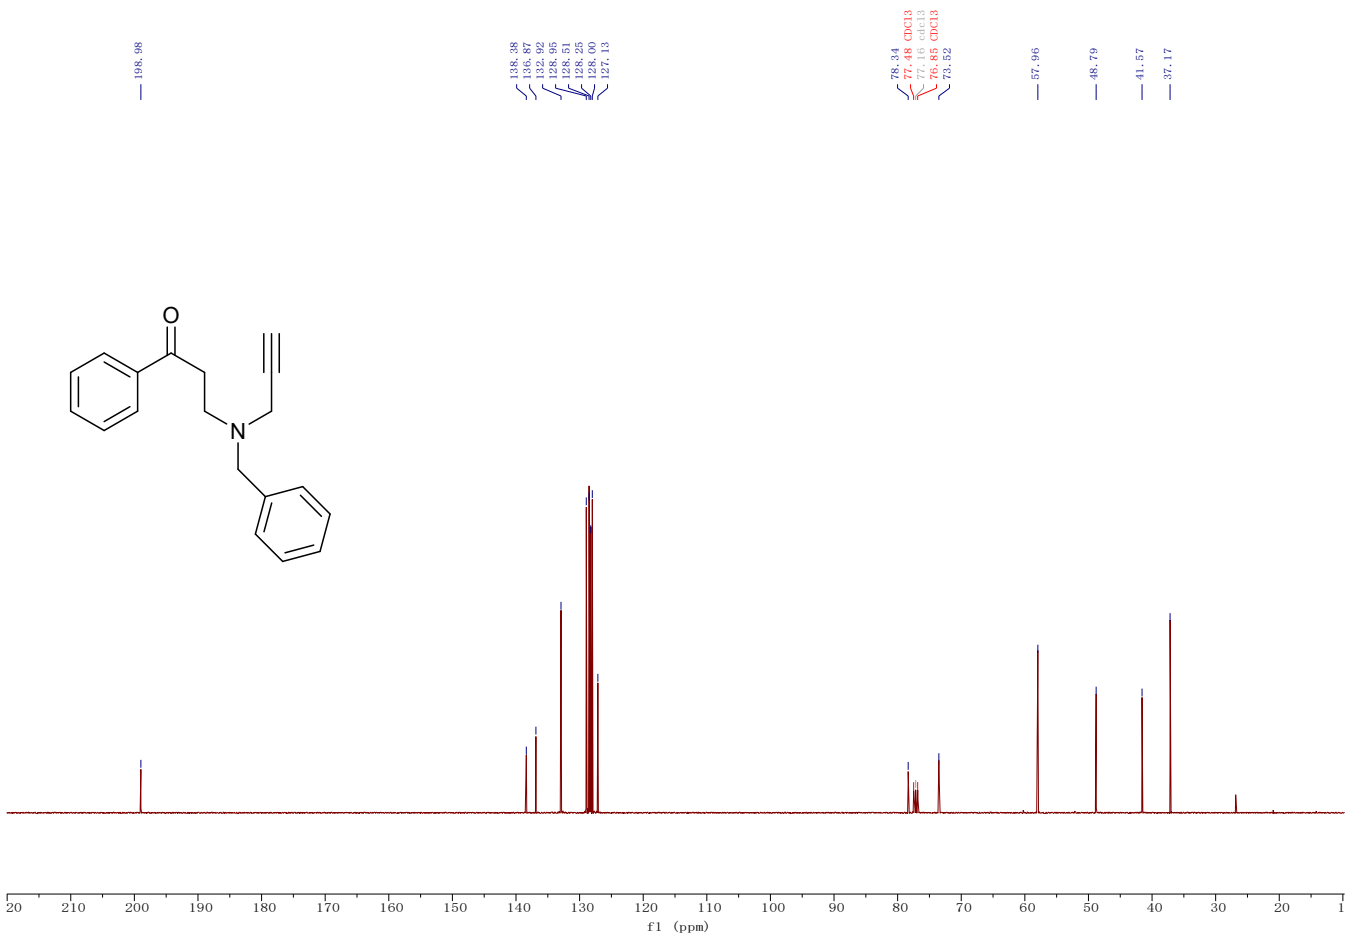

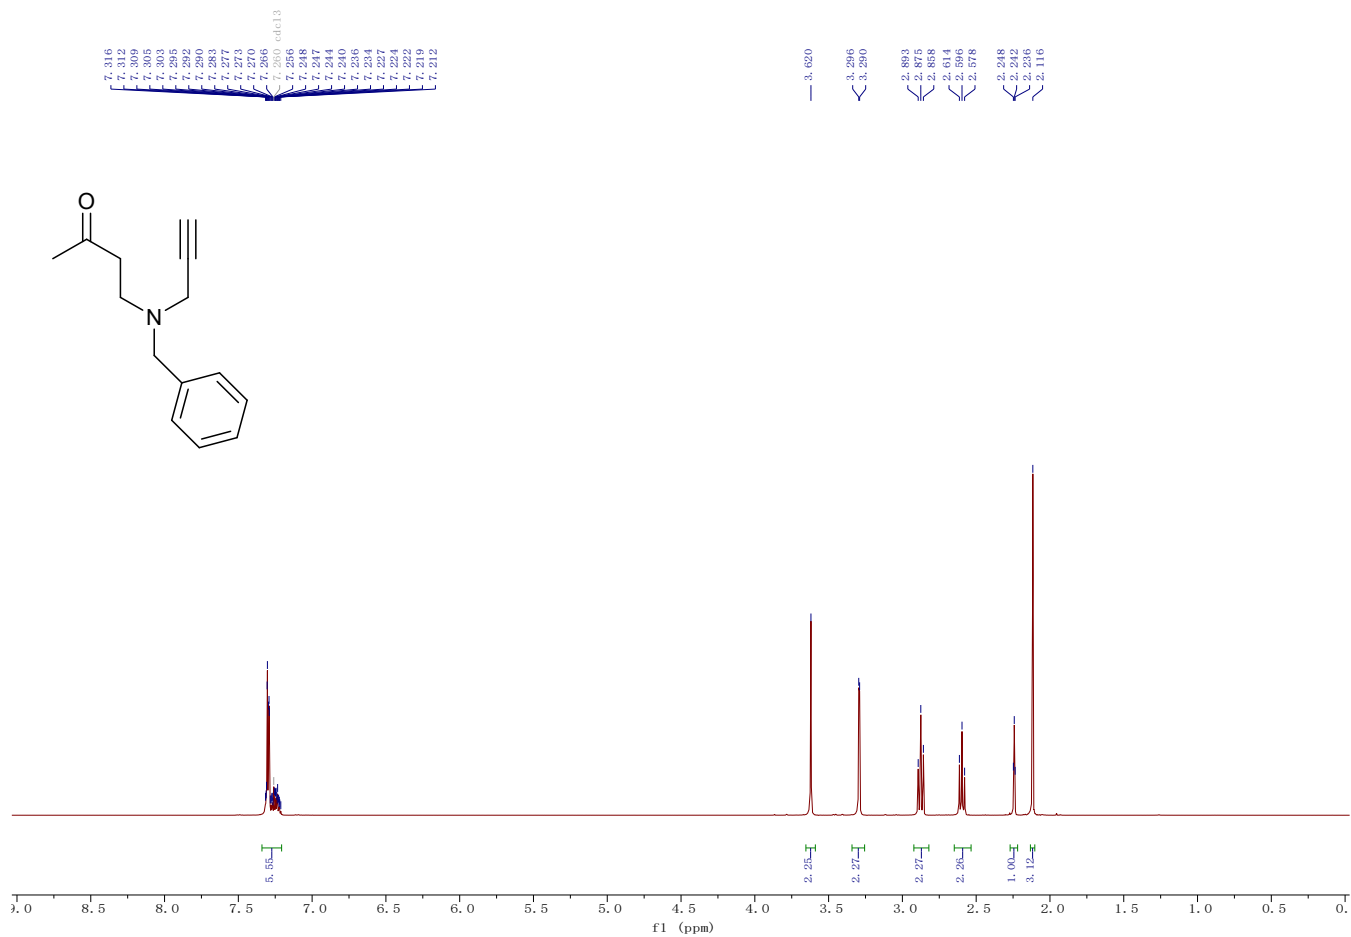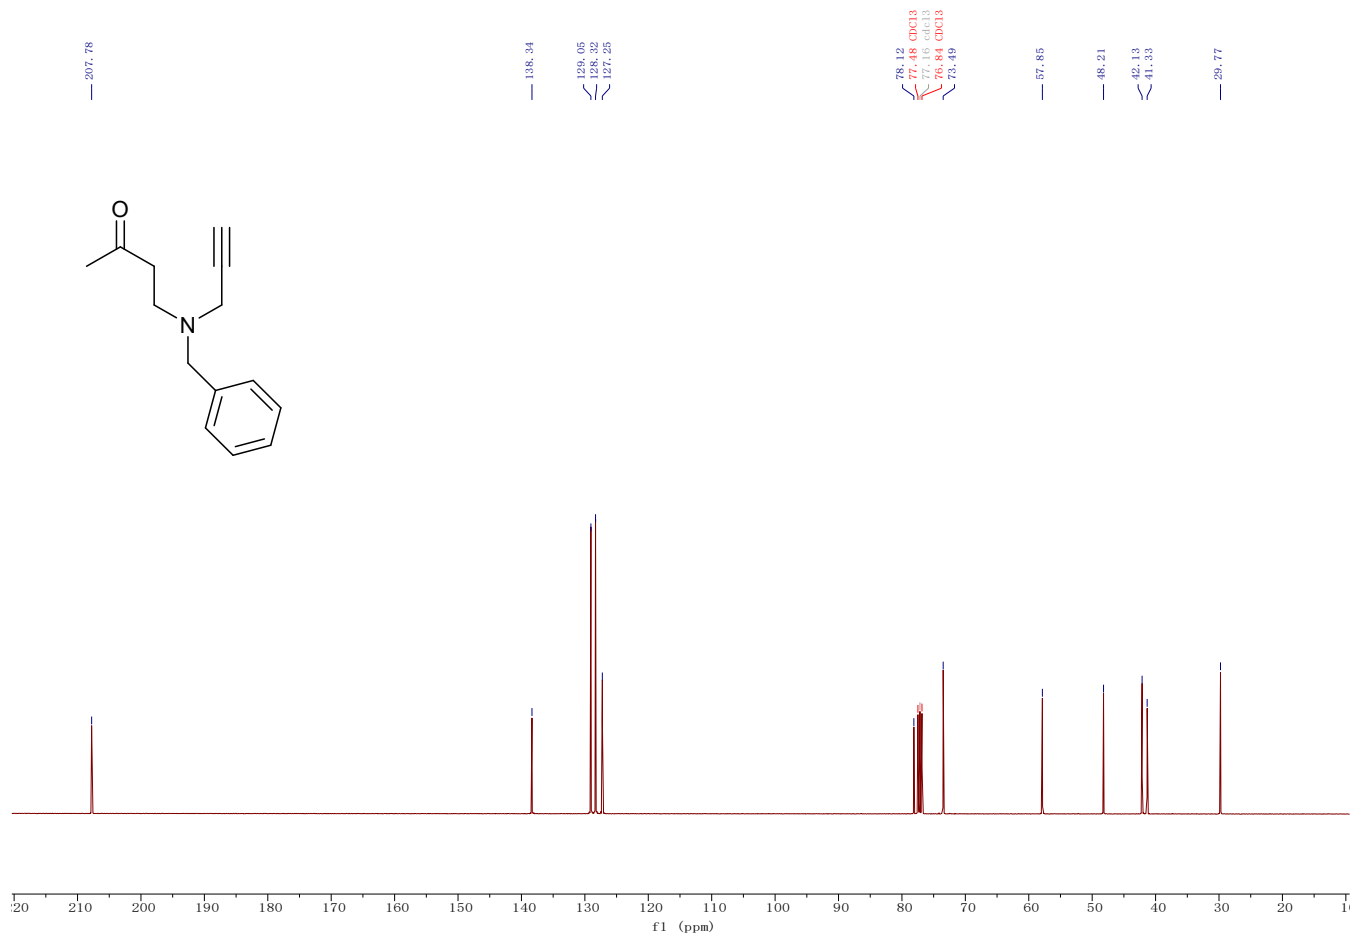

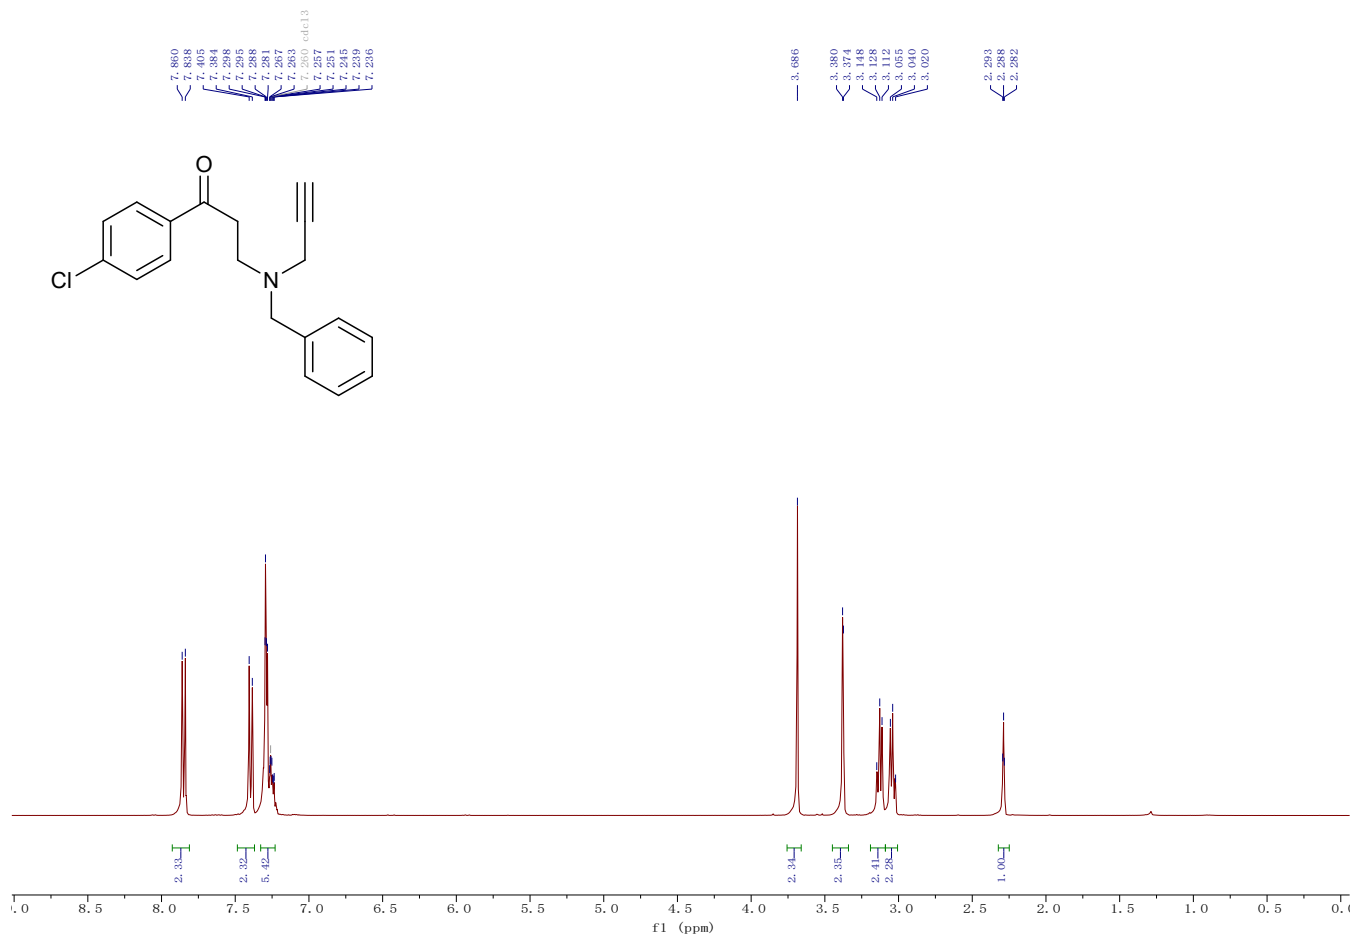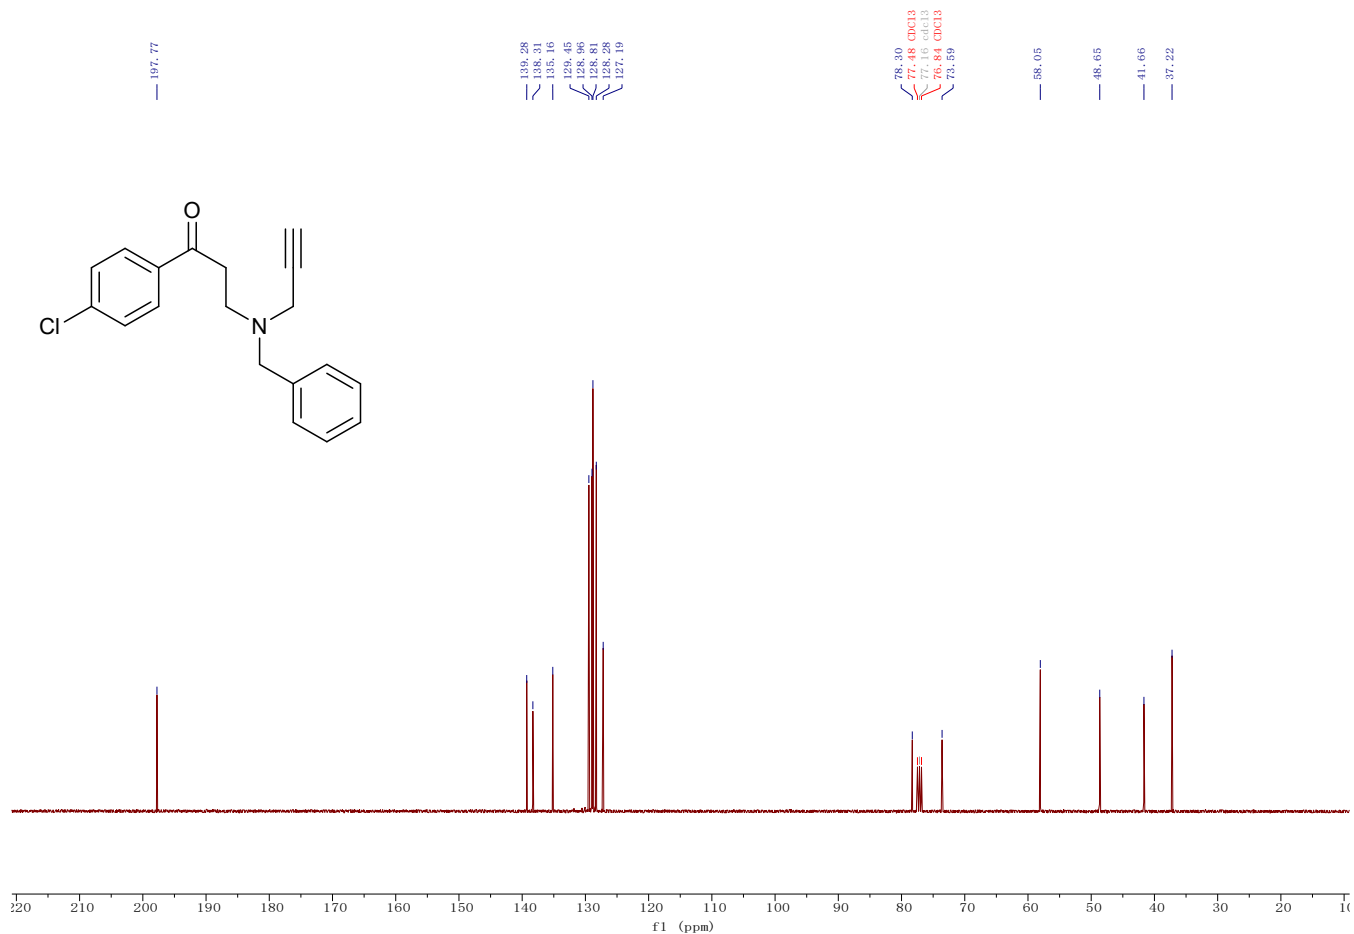

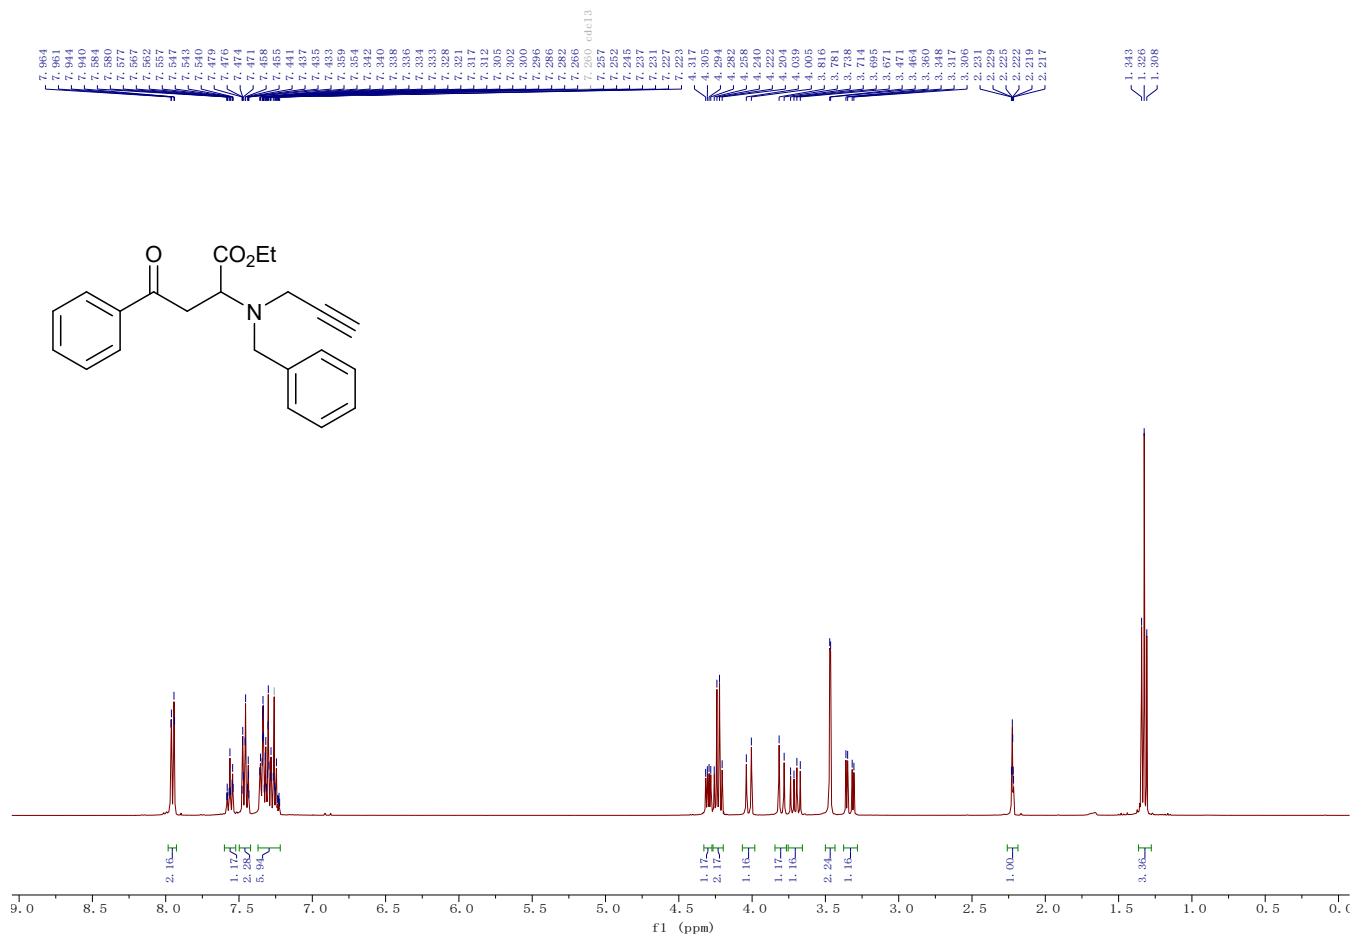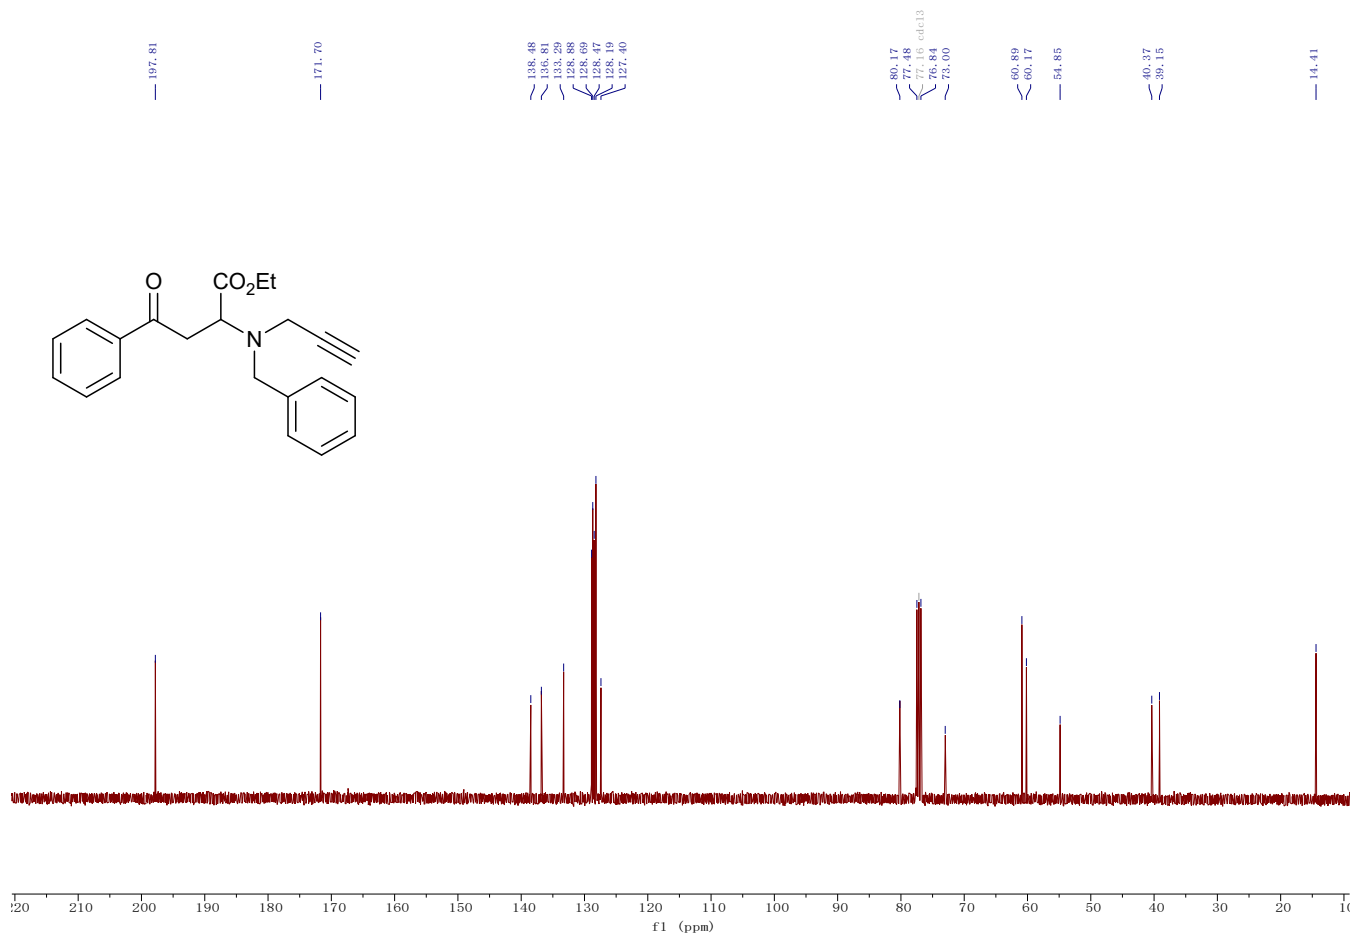

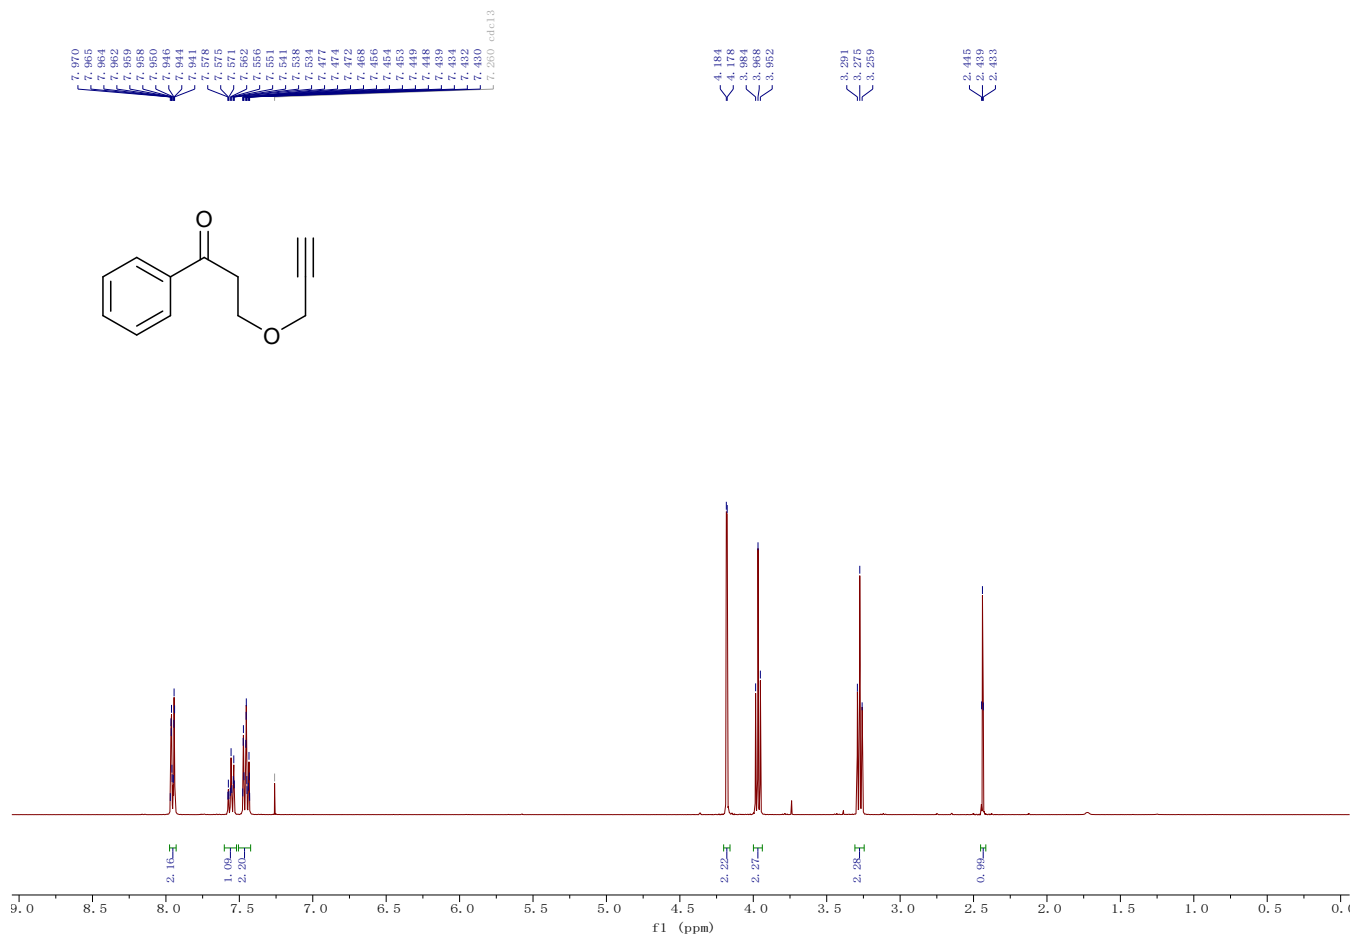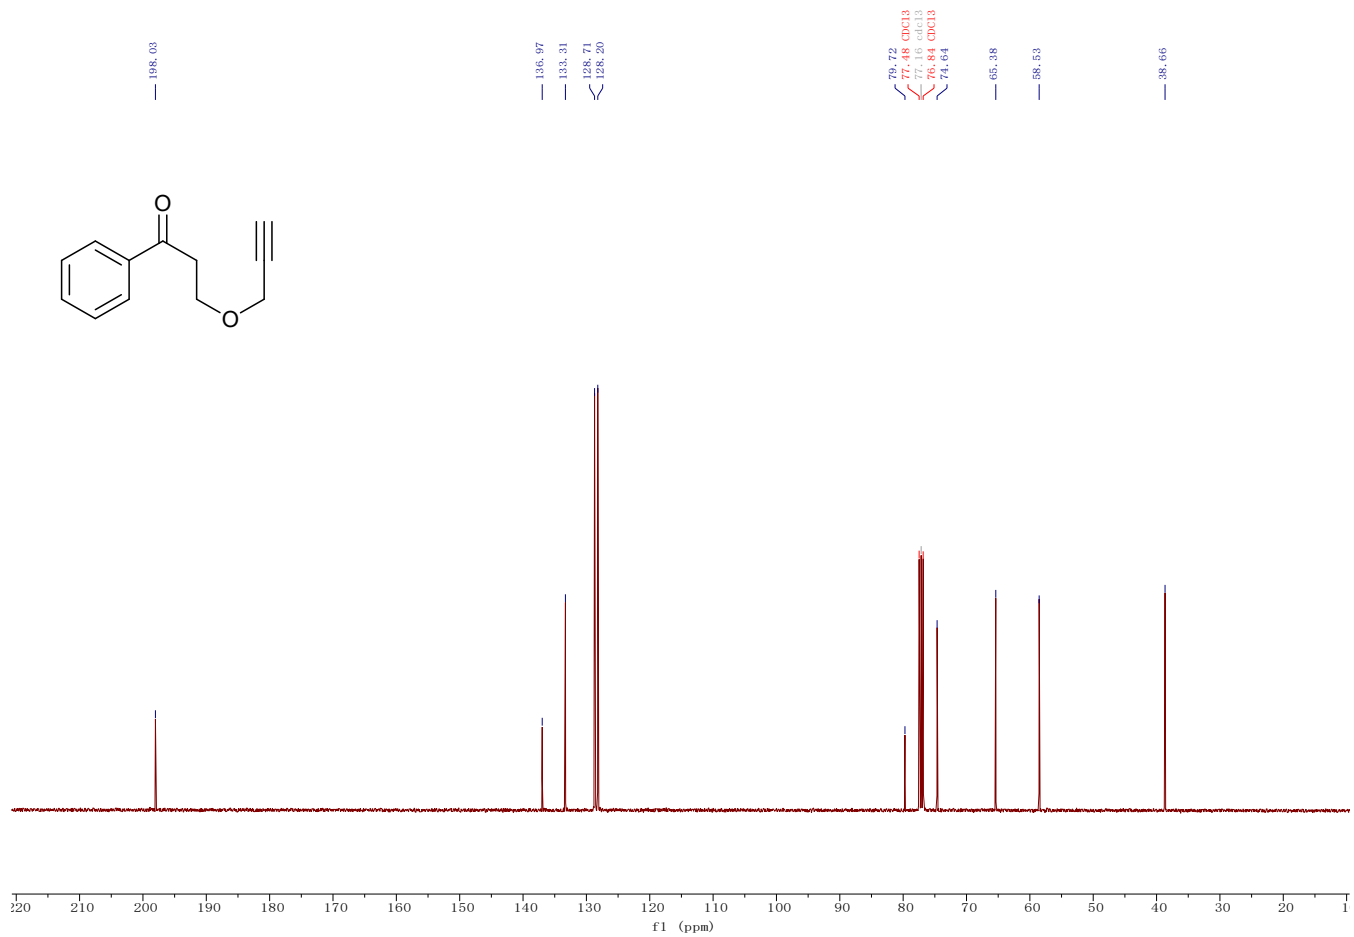

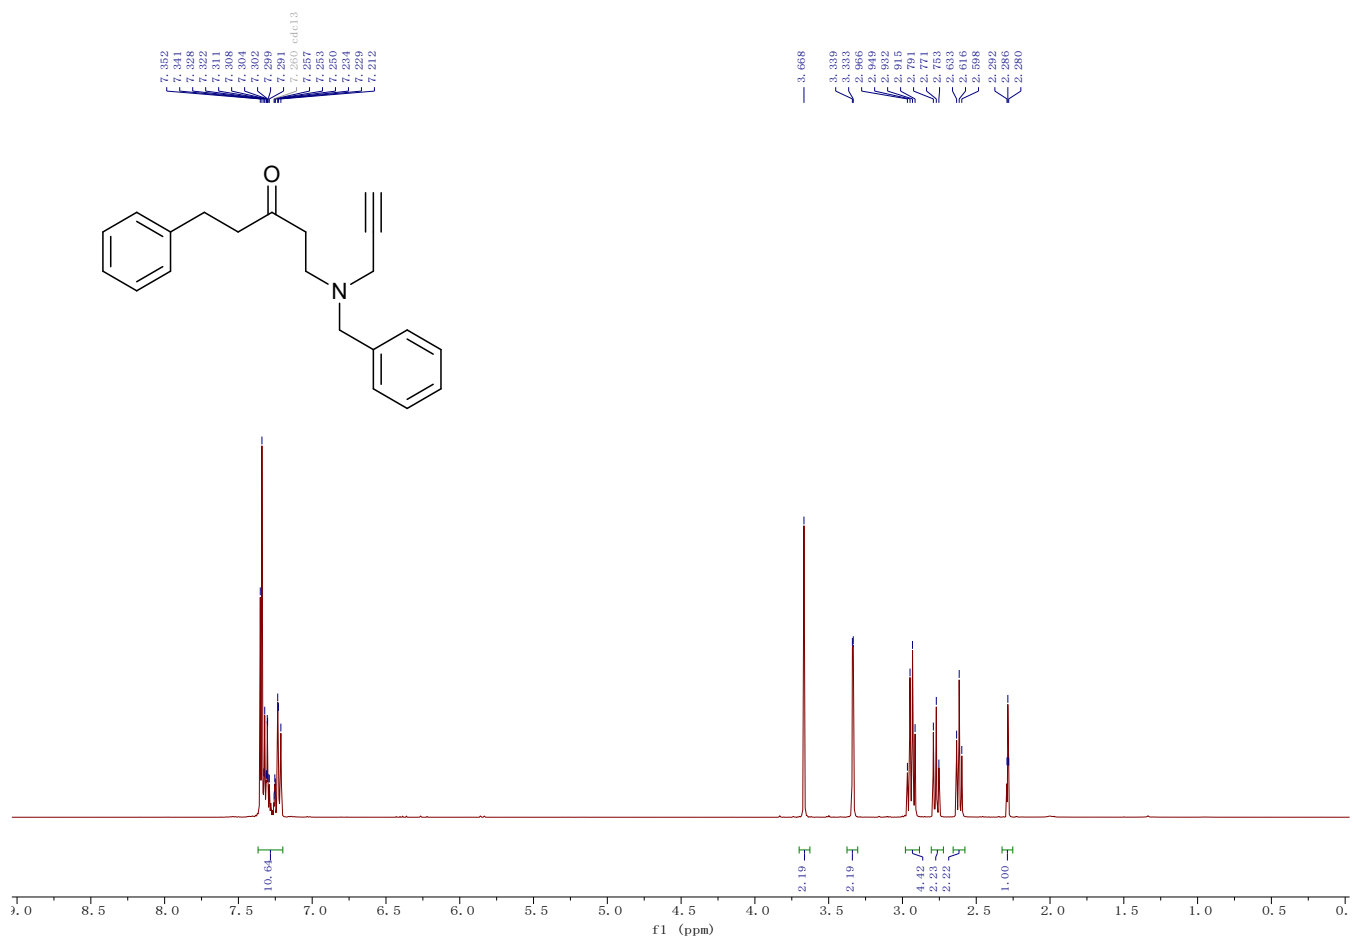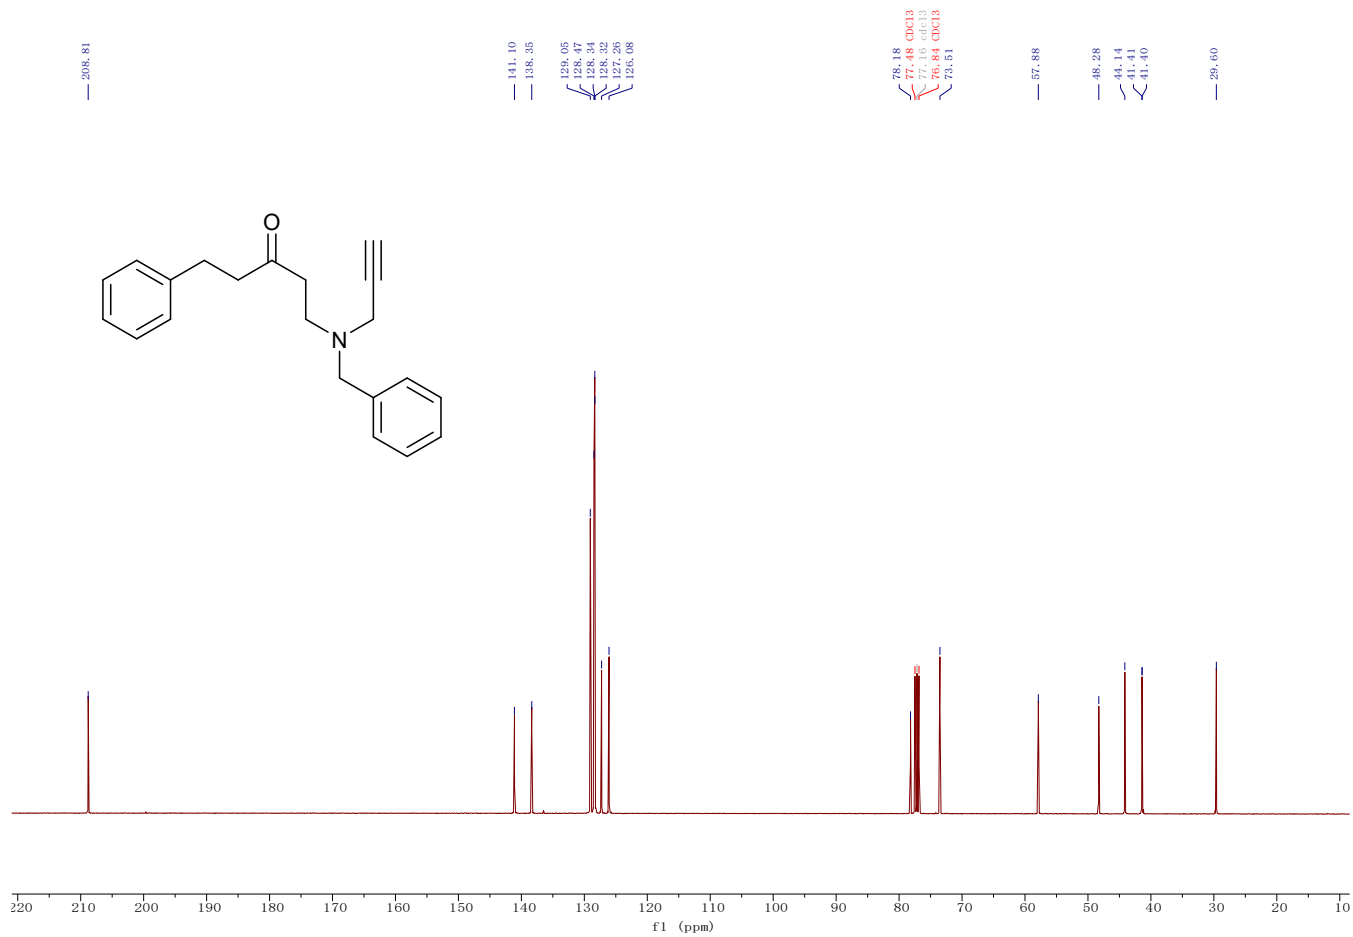



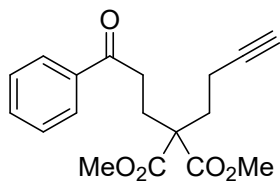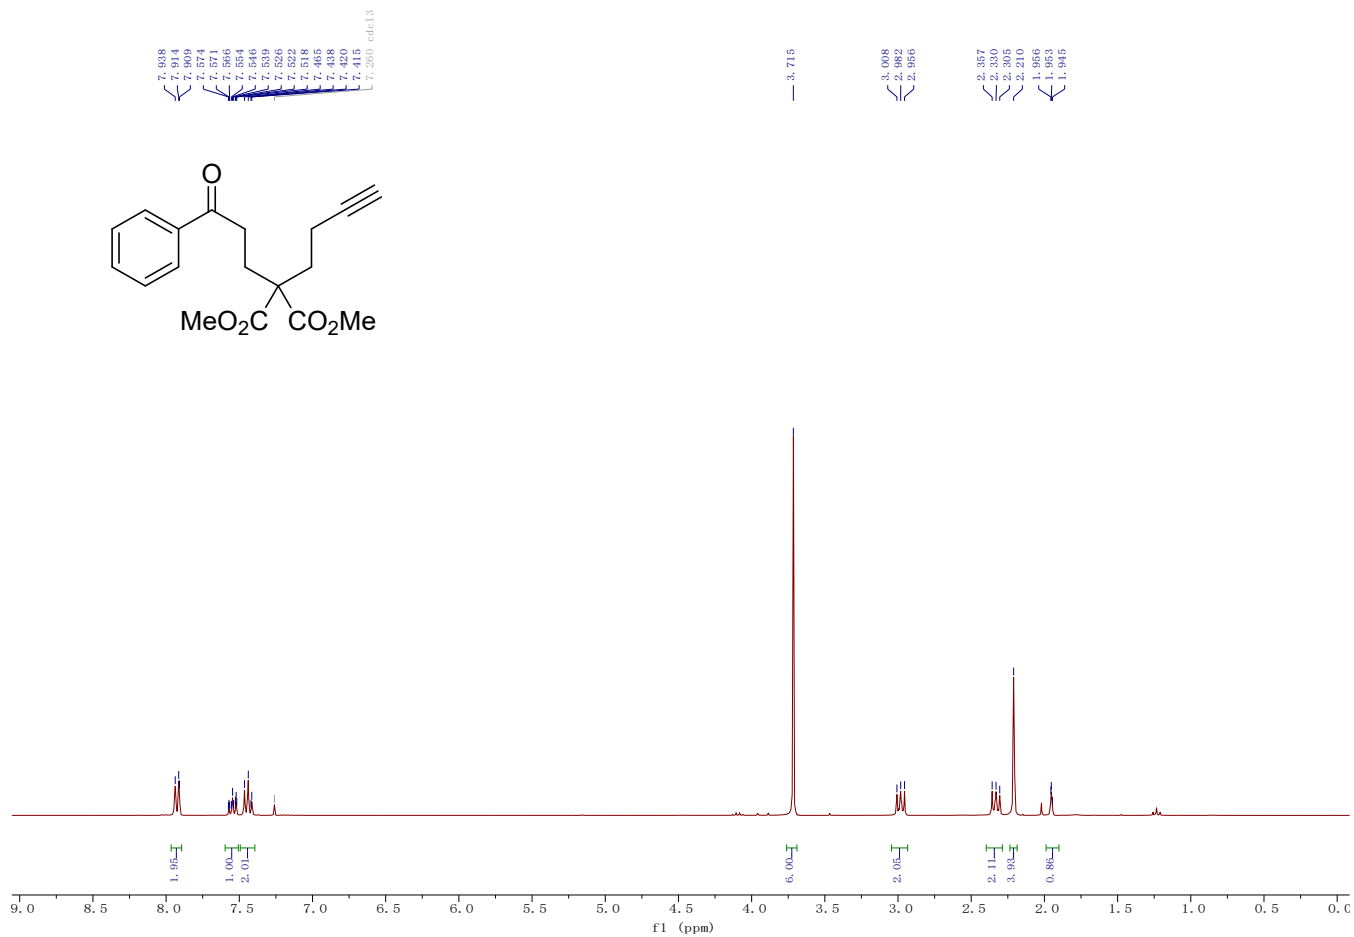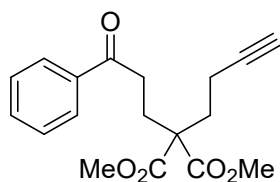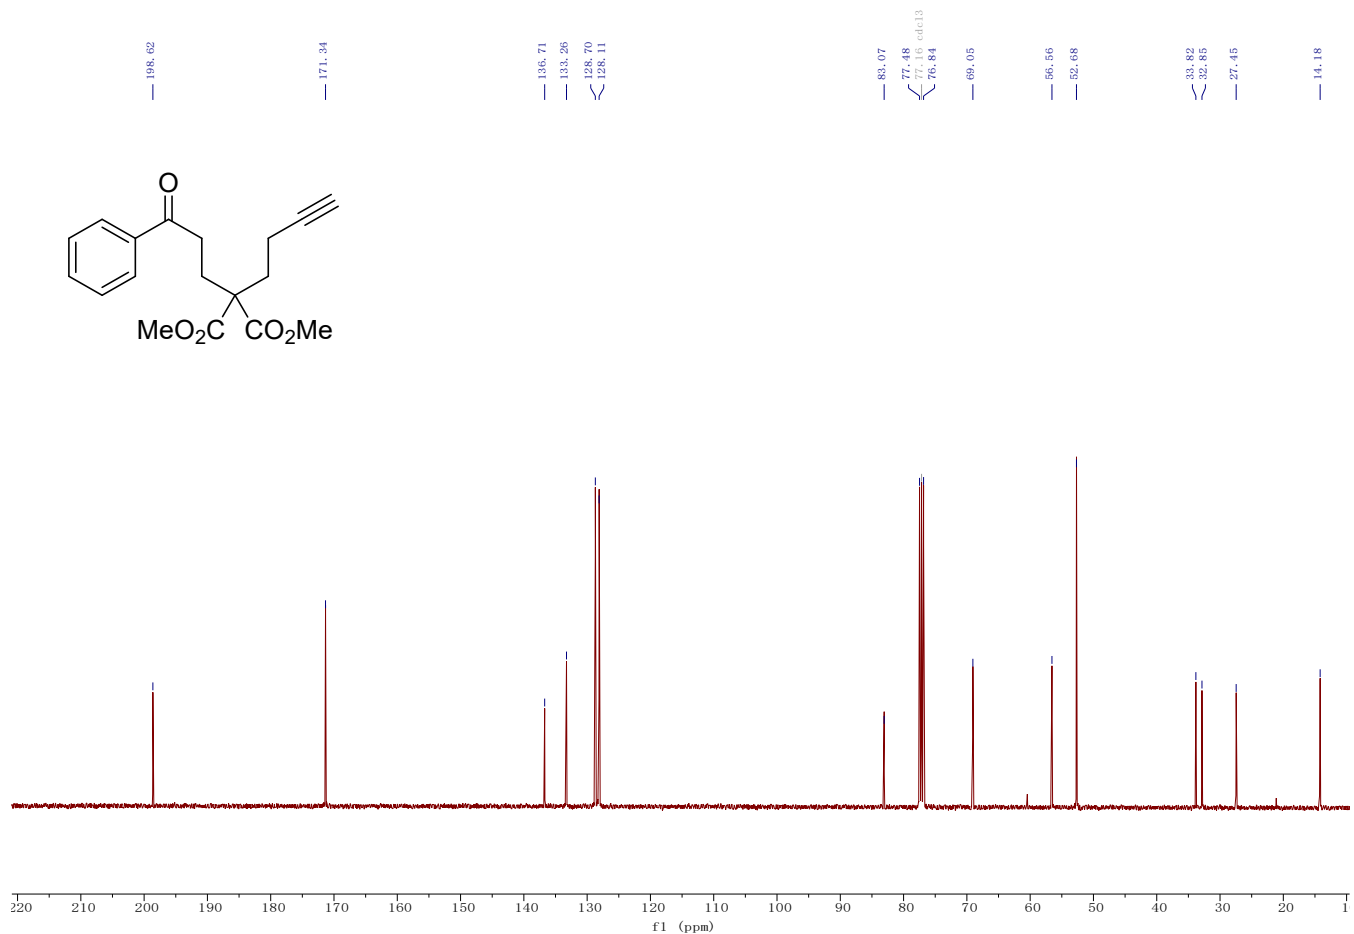

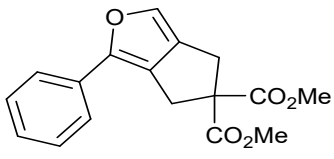

7.570  
7.552  
7.398  
7.379  
7.359  
7.243  
7.224  
7.206

3.774  
3.560  
3.355  
3.352

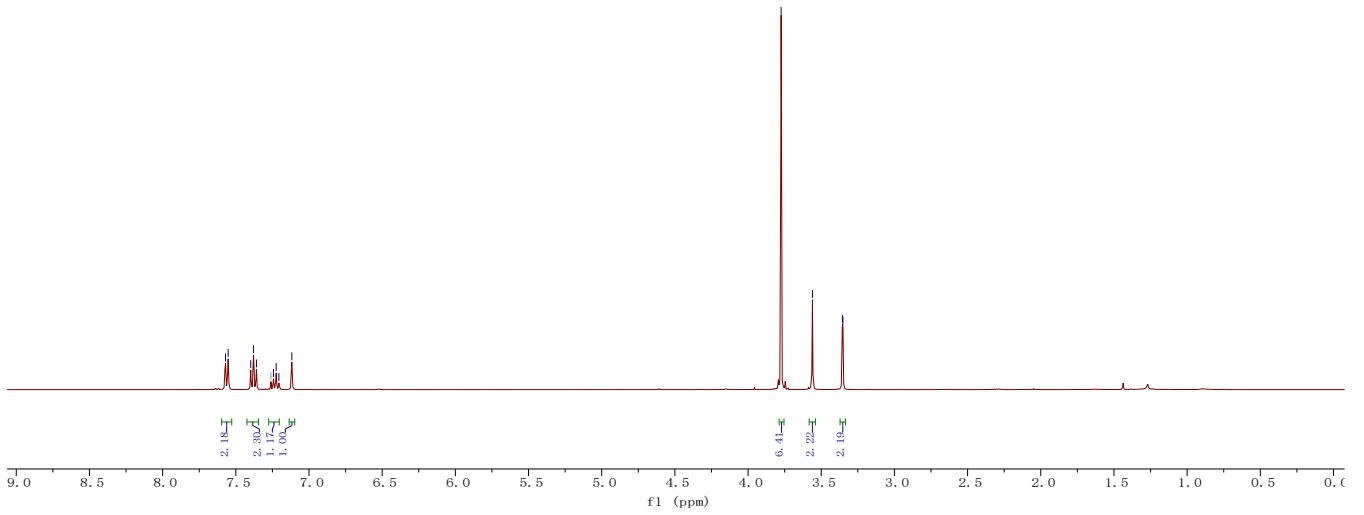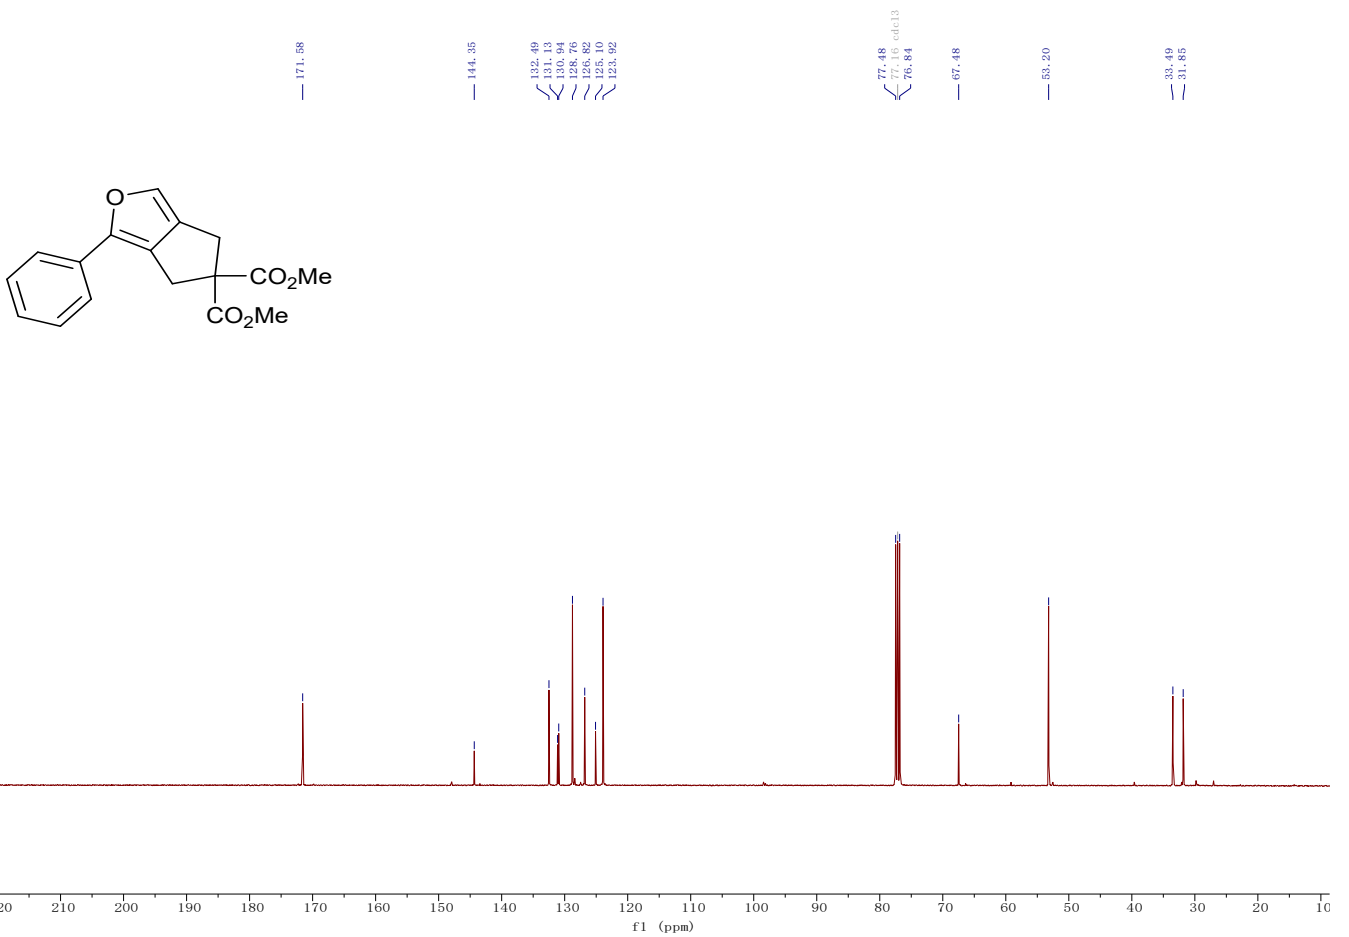

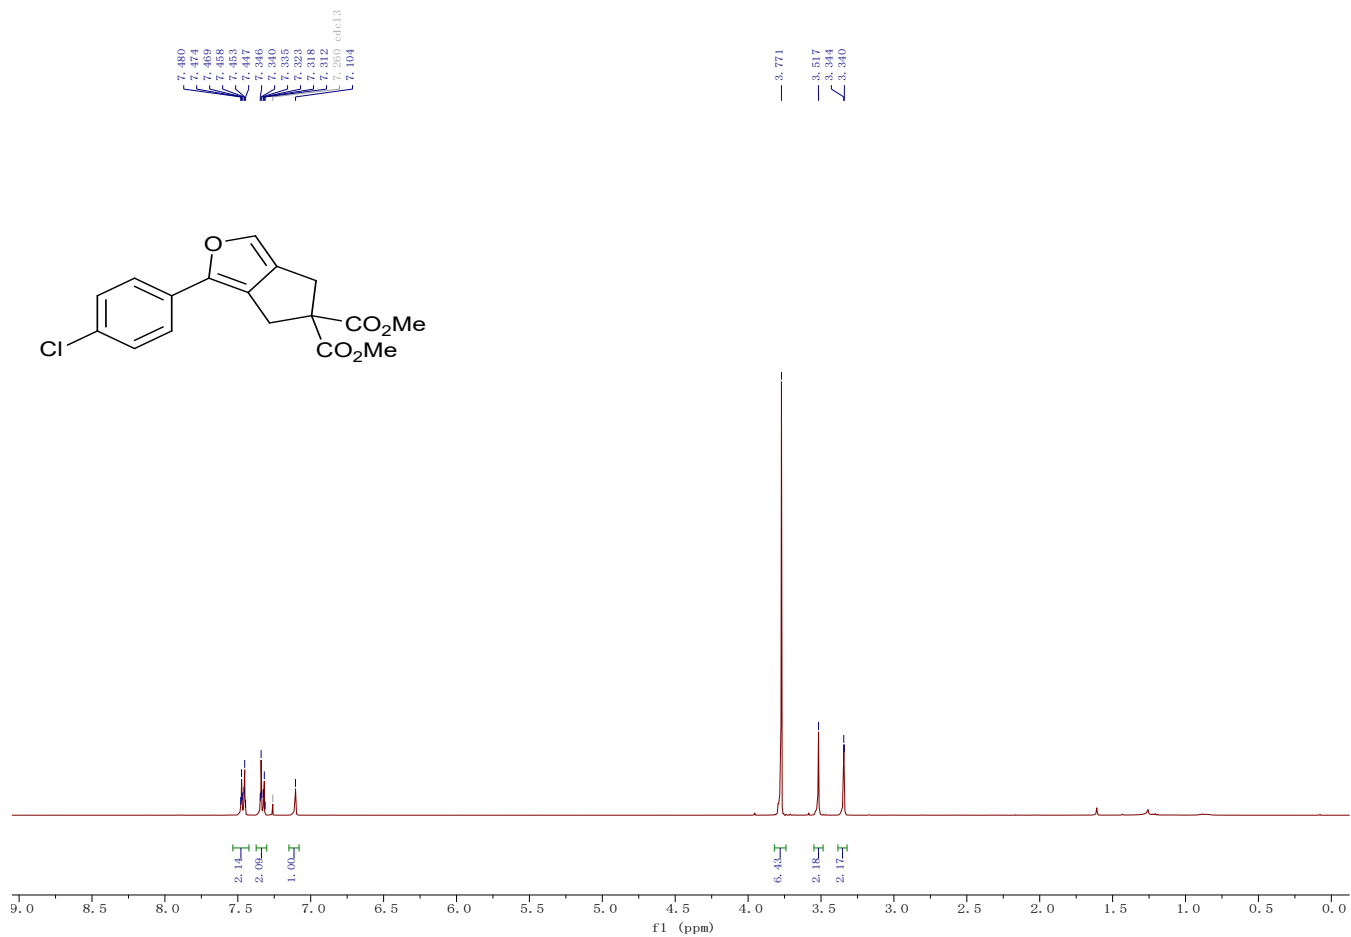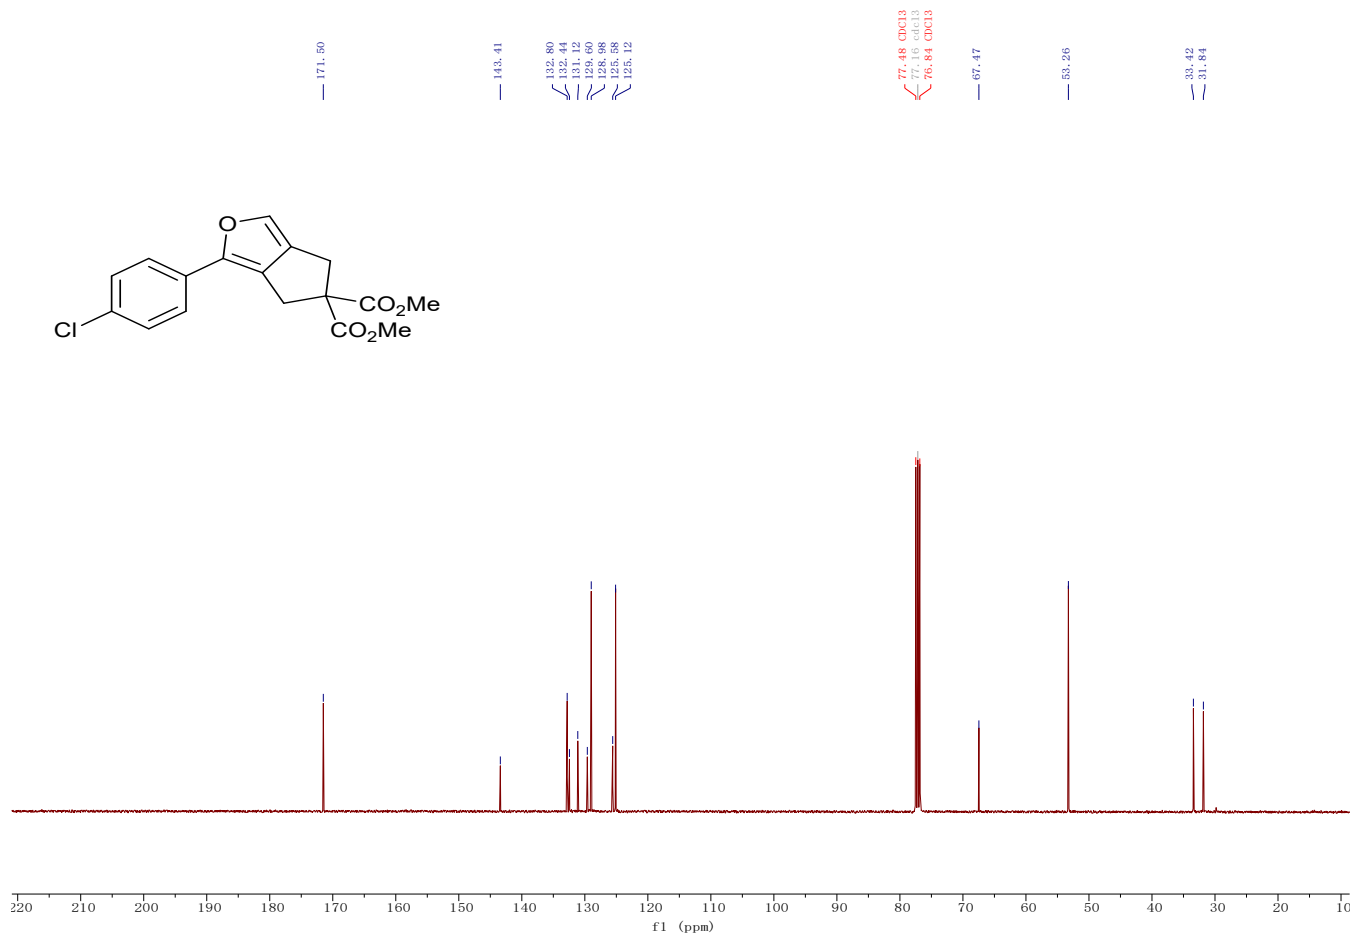

8.001  
7.881  
7.849  
7.828  
7.816  
7.813  
7.796  
7.715  
7.715  
7.693  
7.689  
7.500  
7.487  
7.484  
7.481  
7.467  
7.463  
7.458  
7.456  
7.443  
7.440  
7.437  
7.425  
7.425  
7.255 cdcl3  
7.180

3.798  
3.665  
3.394  
3.390

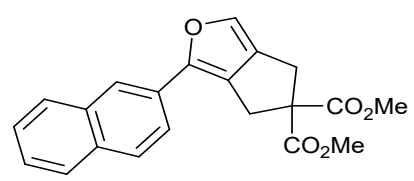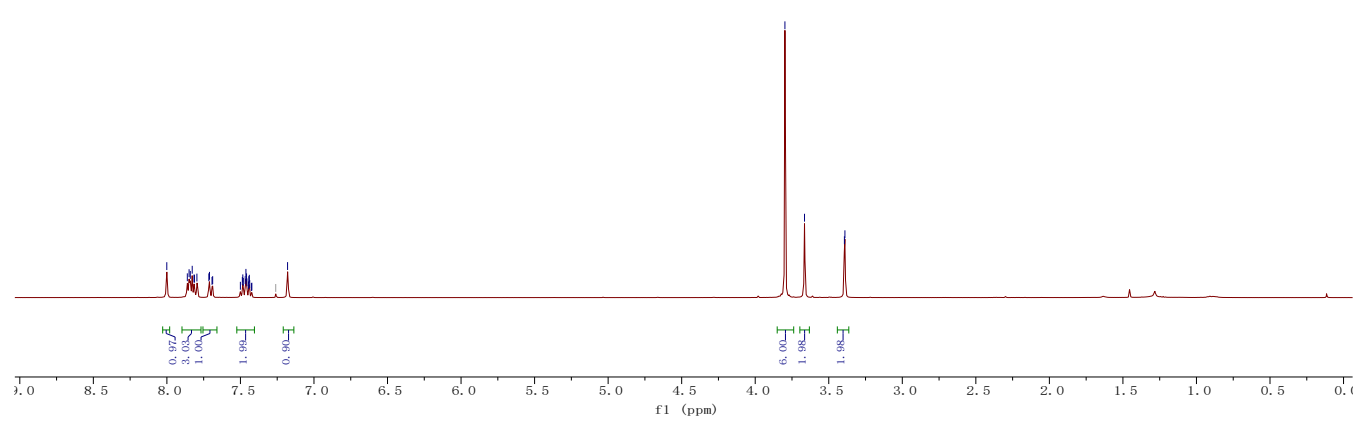

171.58

144.46  
133.64  
132.75  
132.33  
131.15  
129.65  
128.85  
128.14  
127.84  
126.54  
125.67  
125.65  
122.39  
122.23

77.48 CDCl3  
77.16 CDCl3  
76.84 CDCl3

67.50

53.23

33.62  
31.84

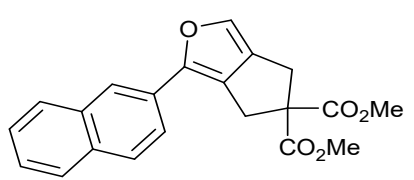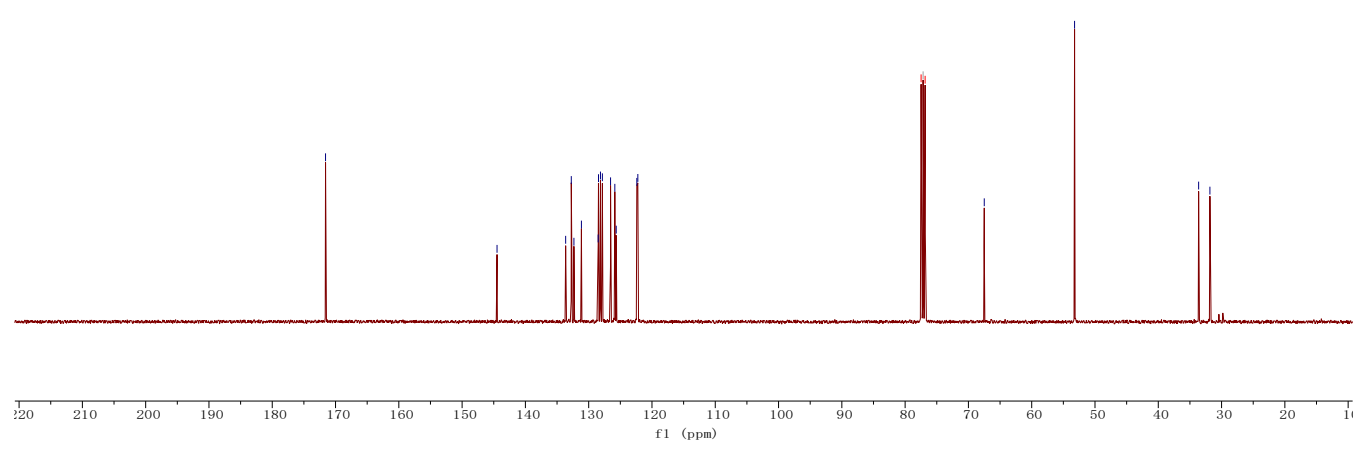

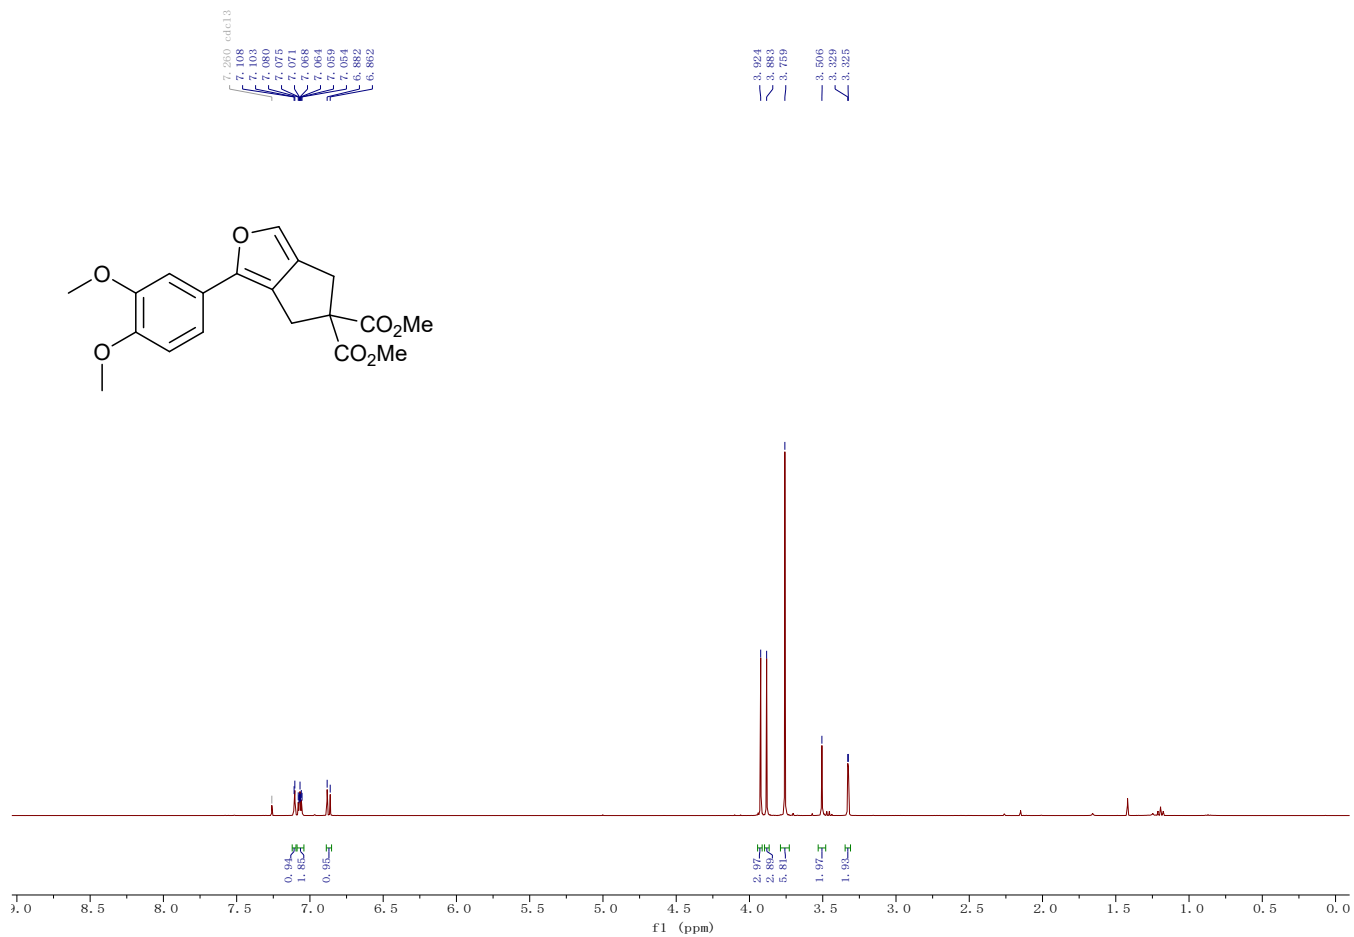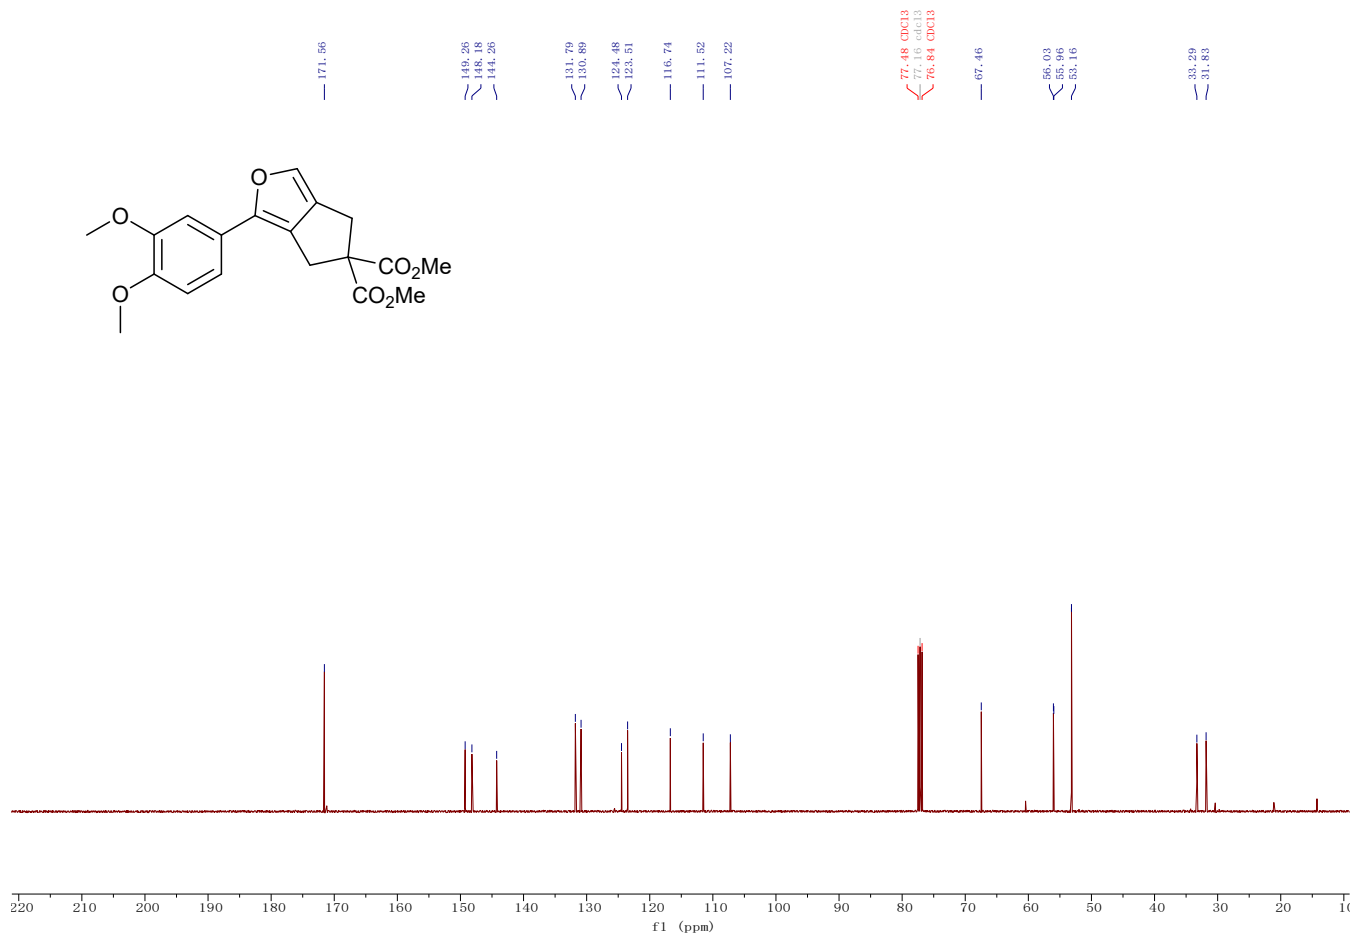

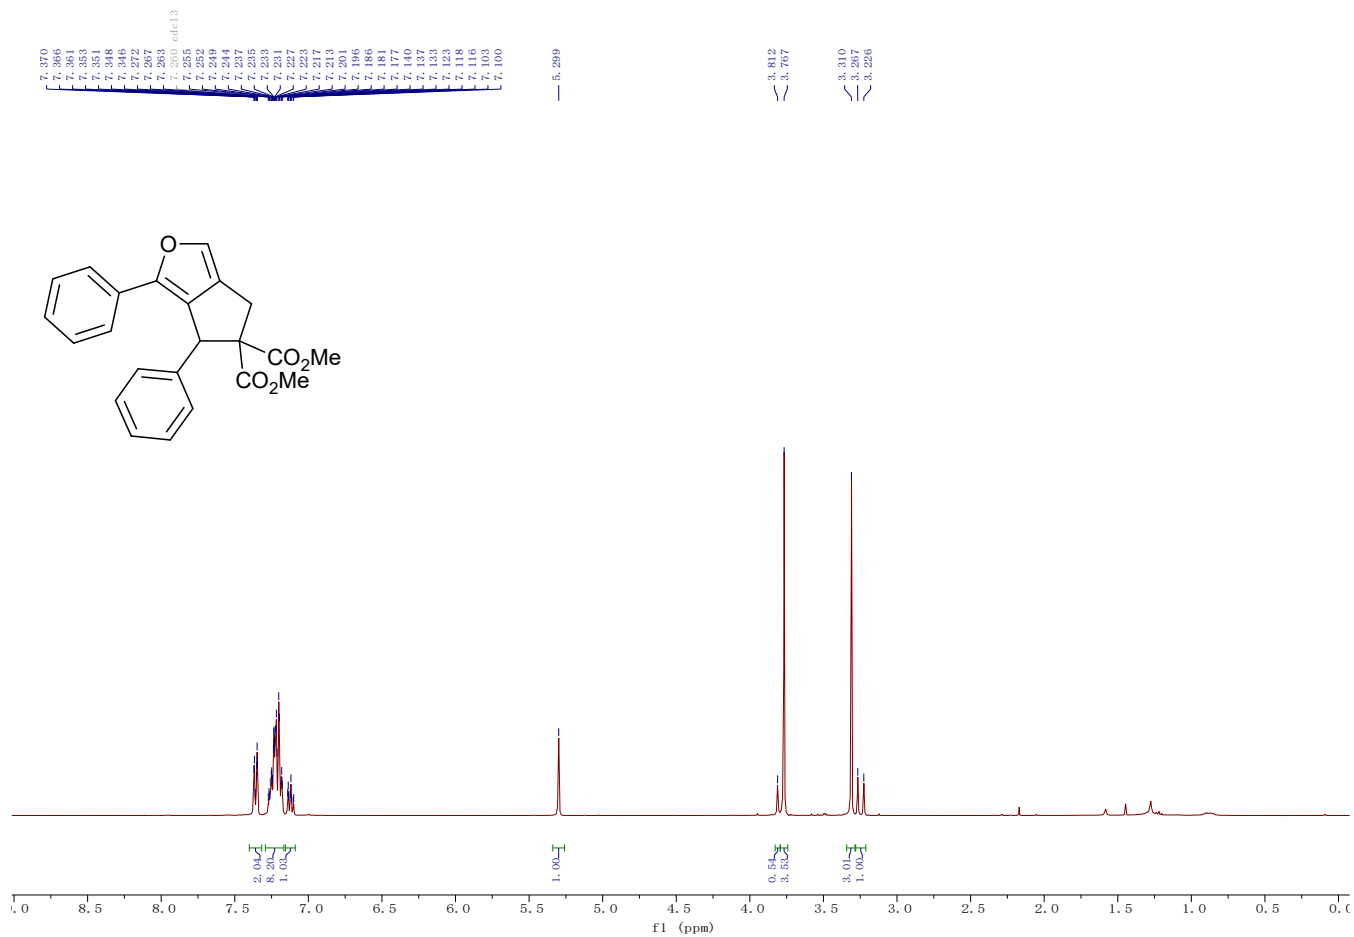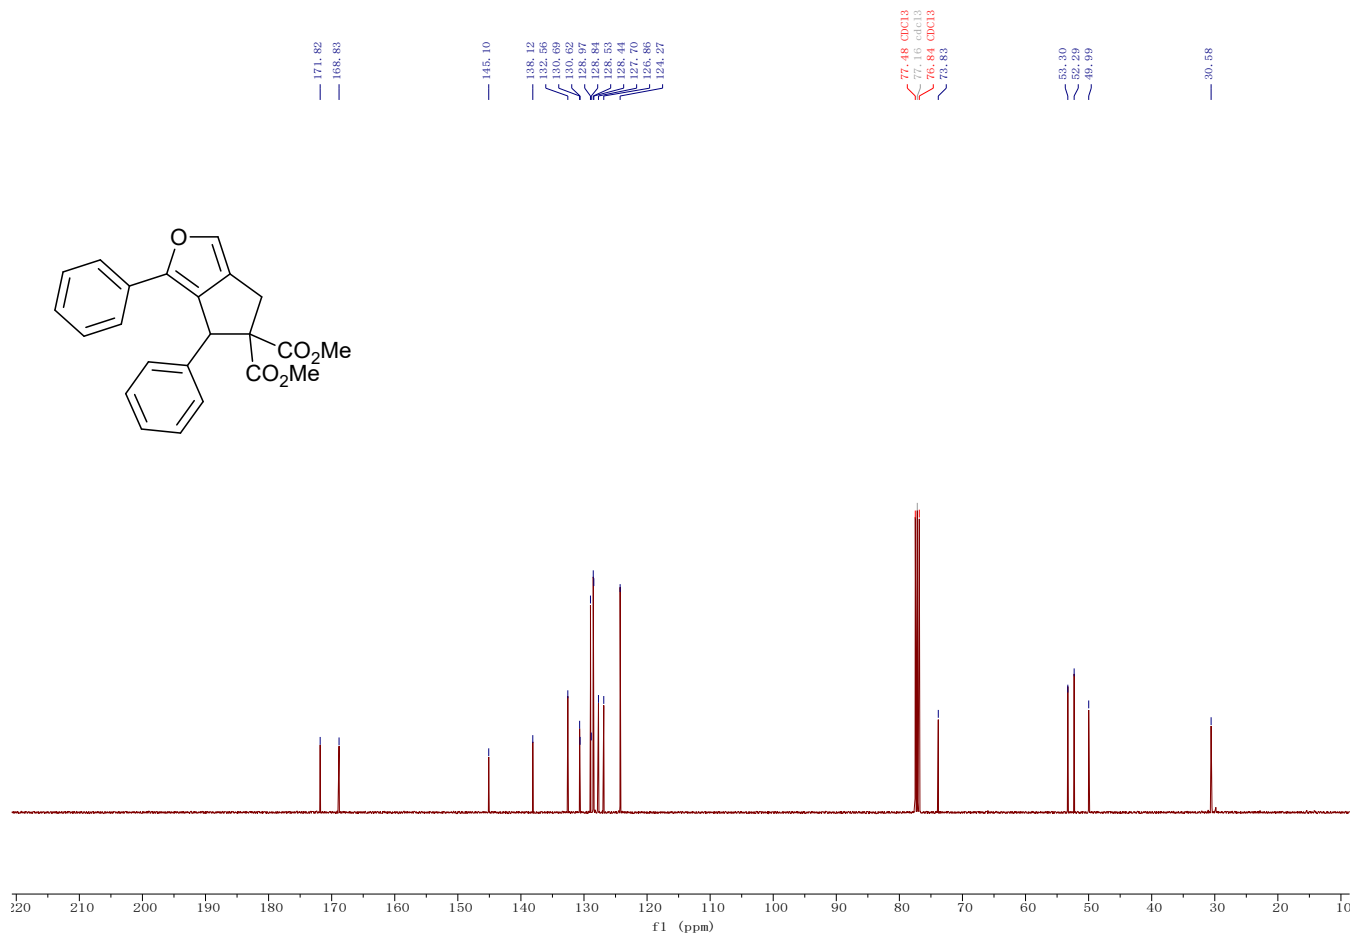

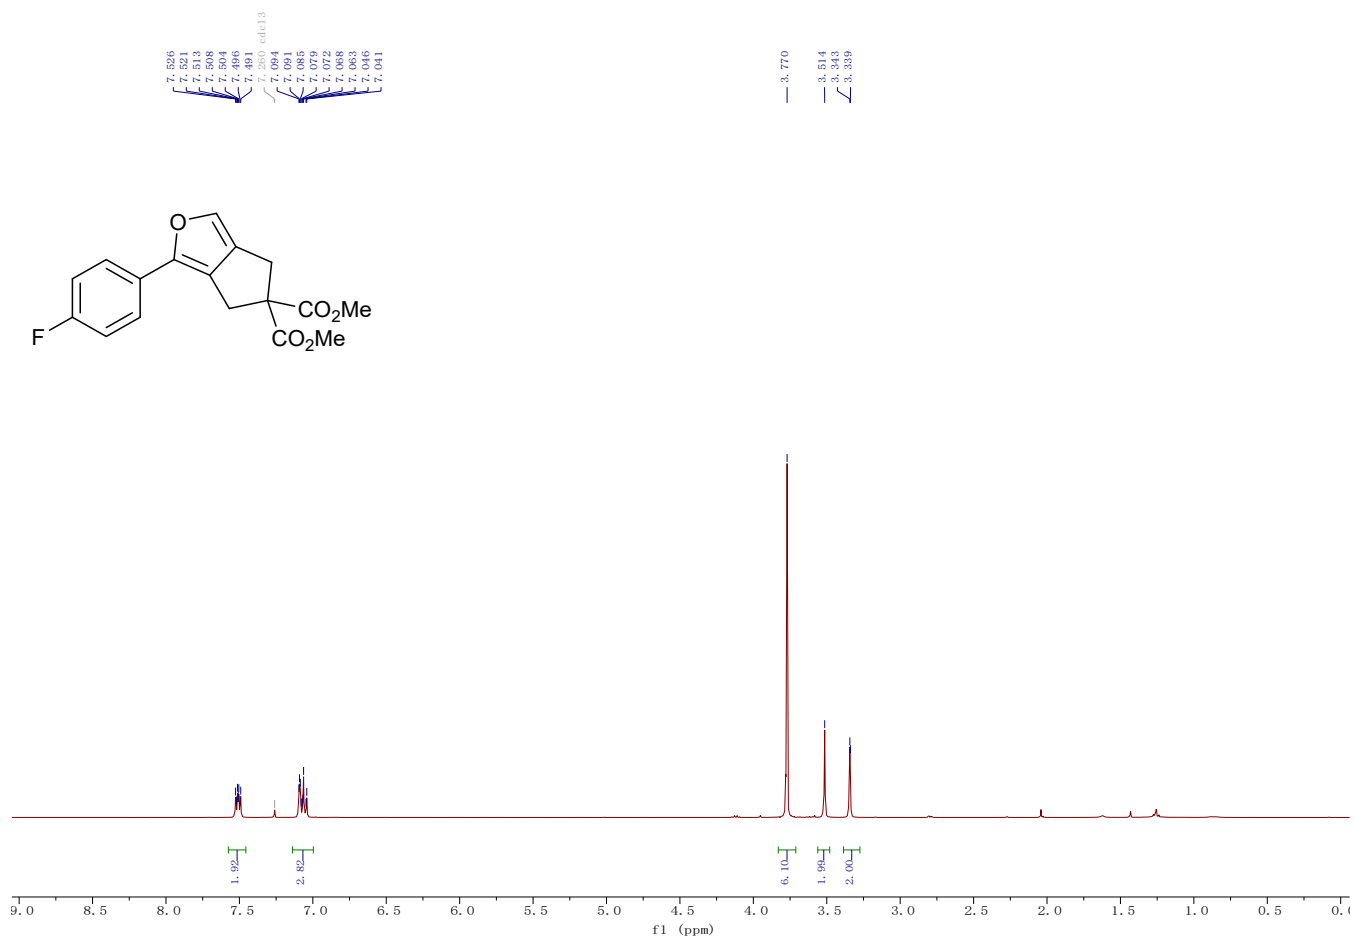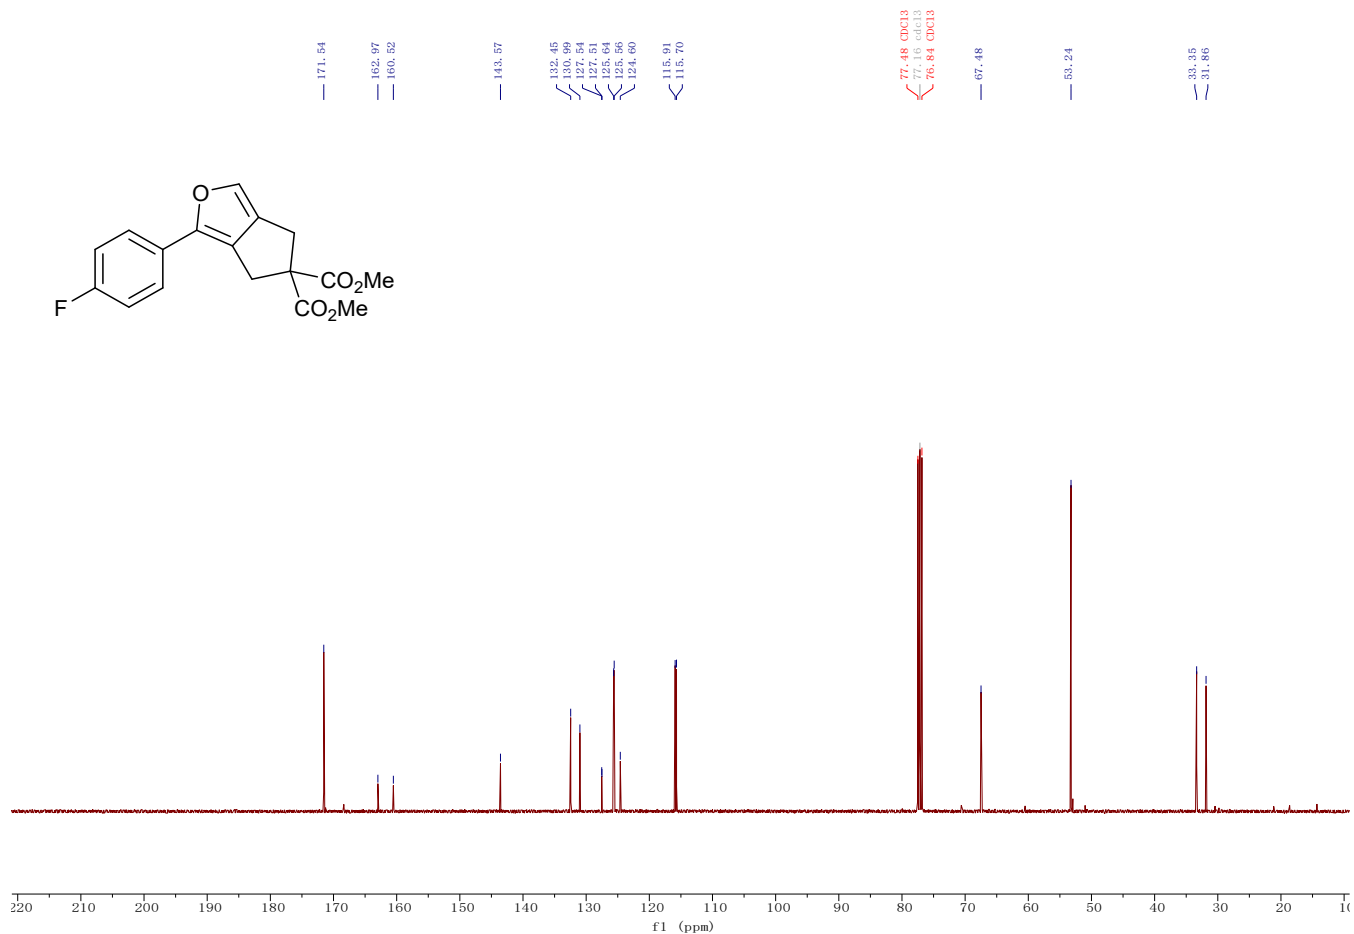

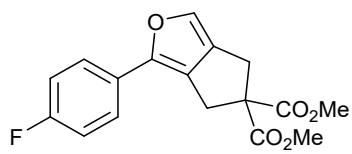

-114.808

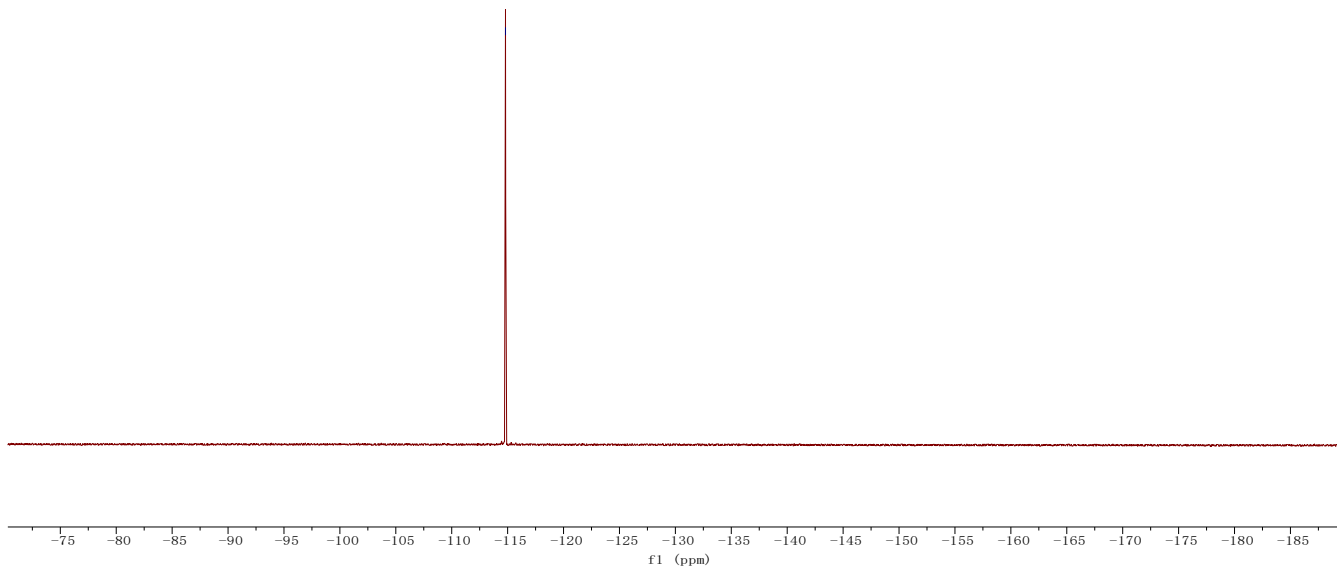



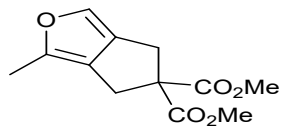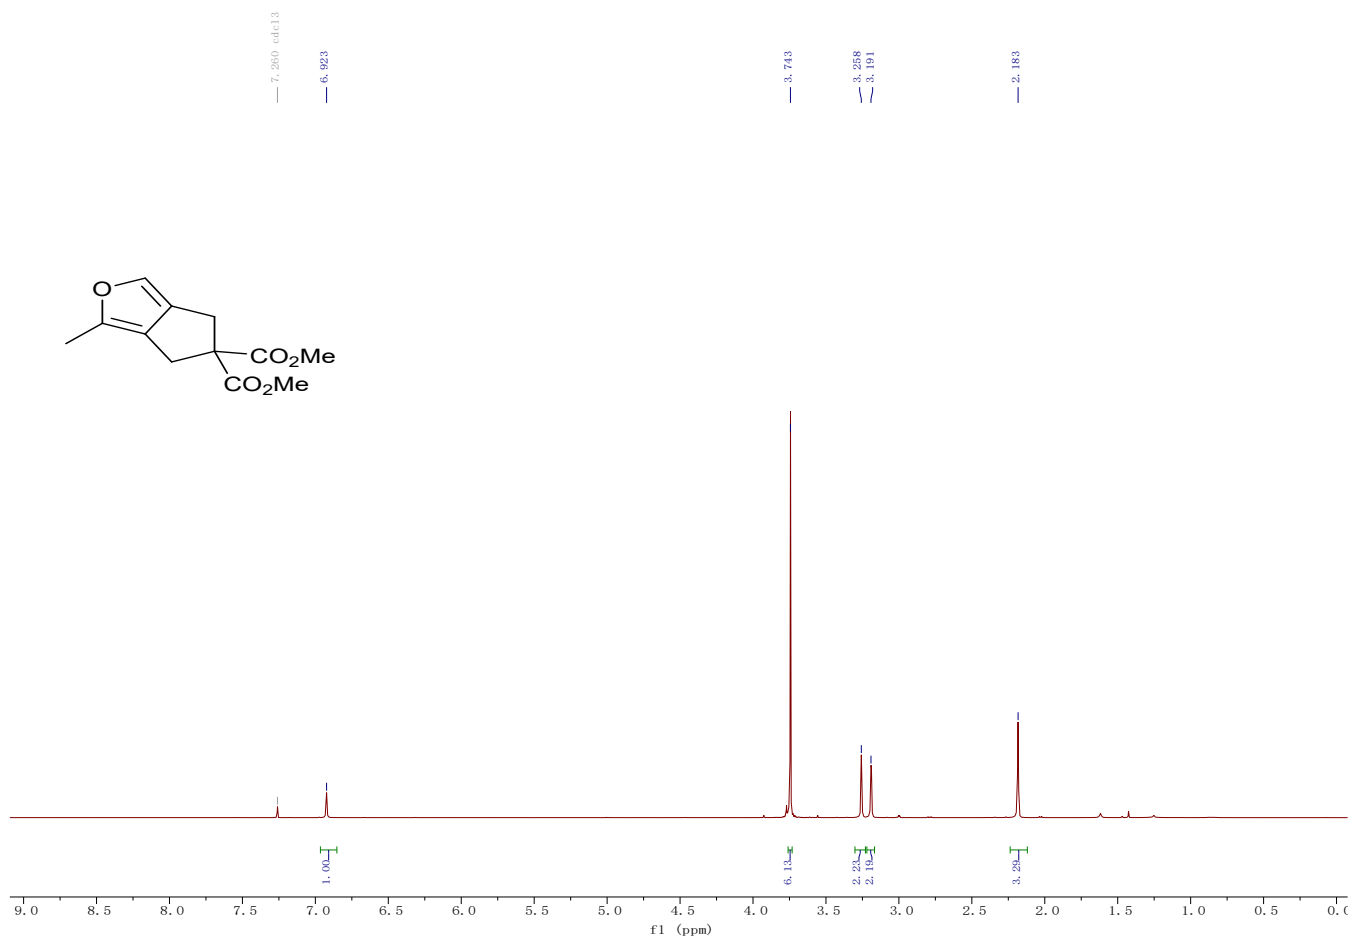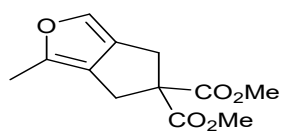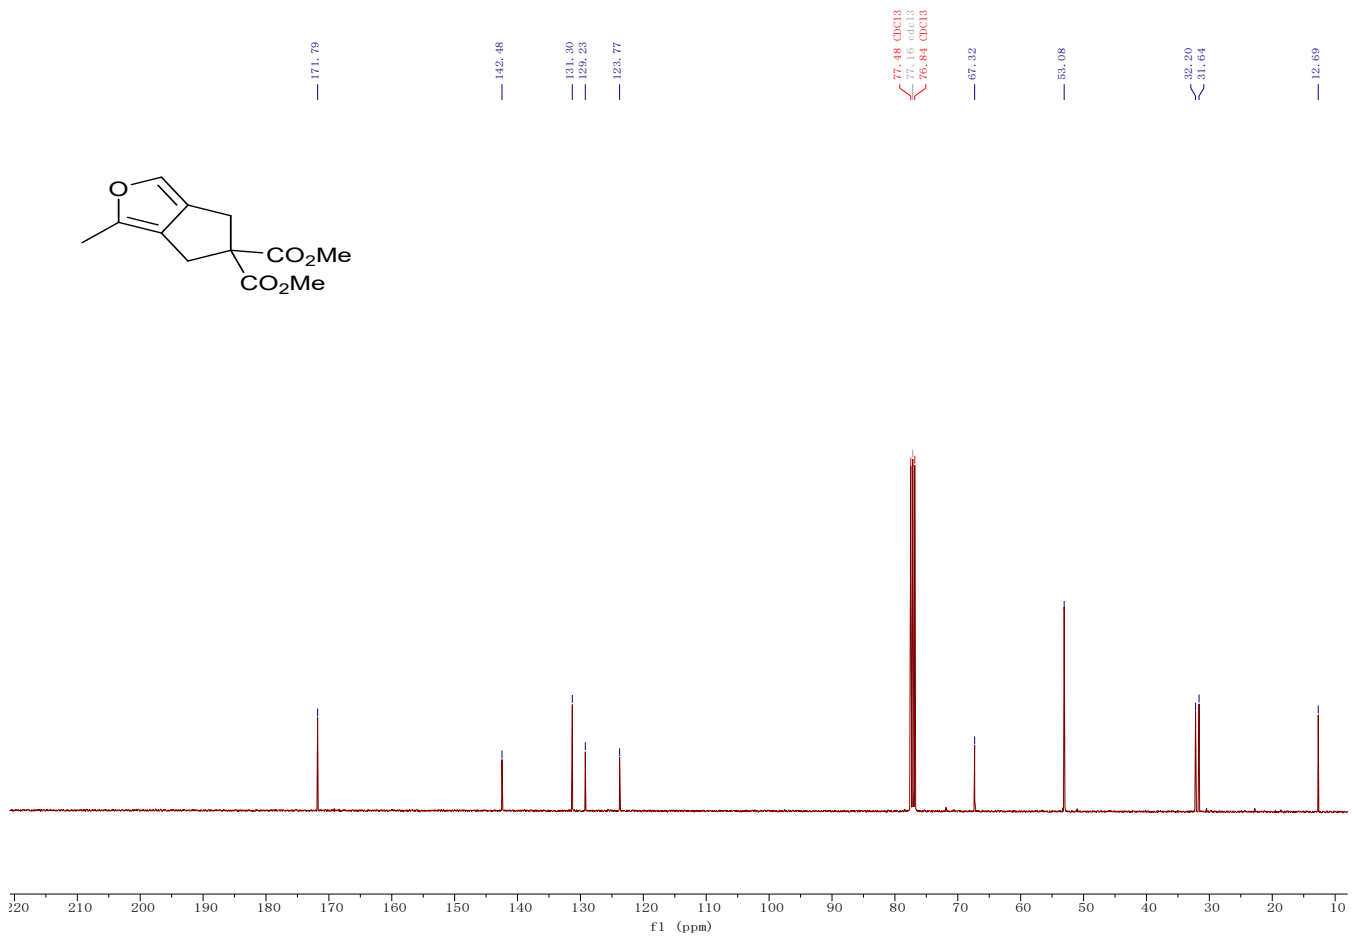

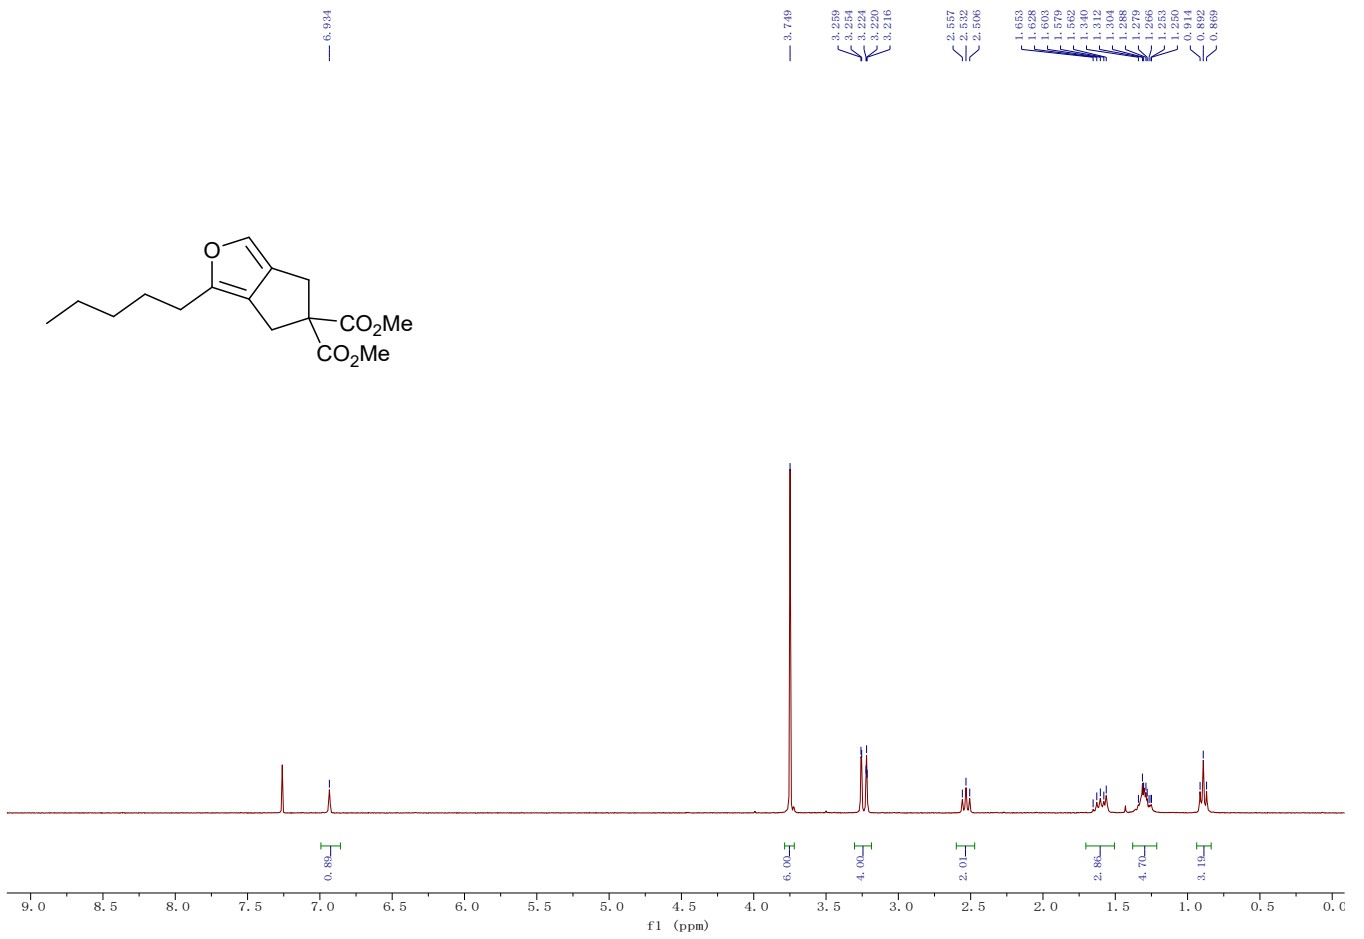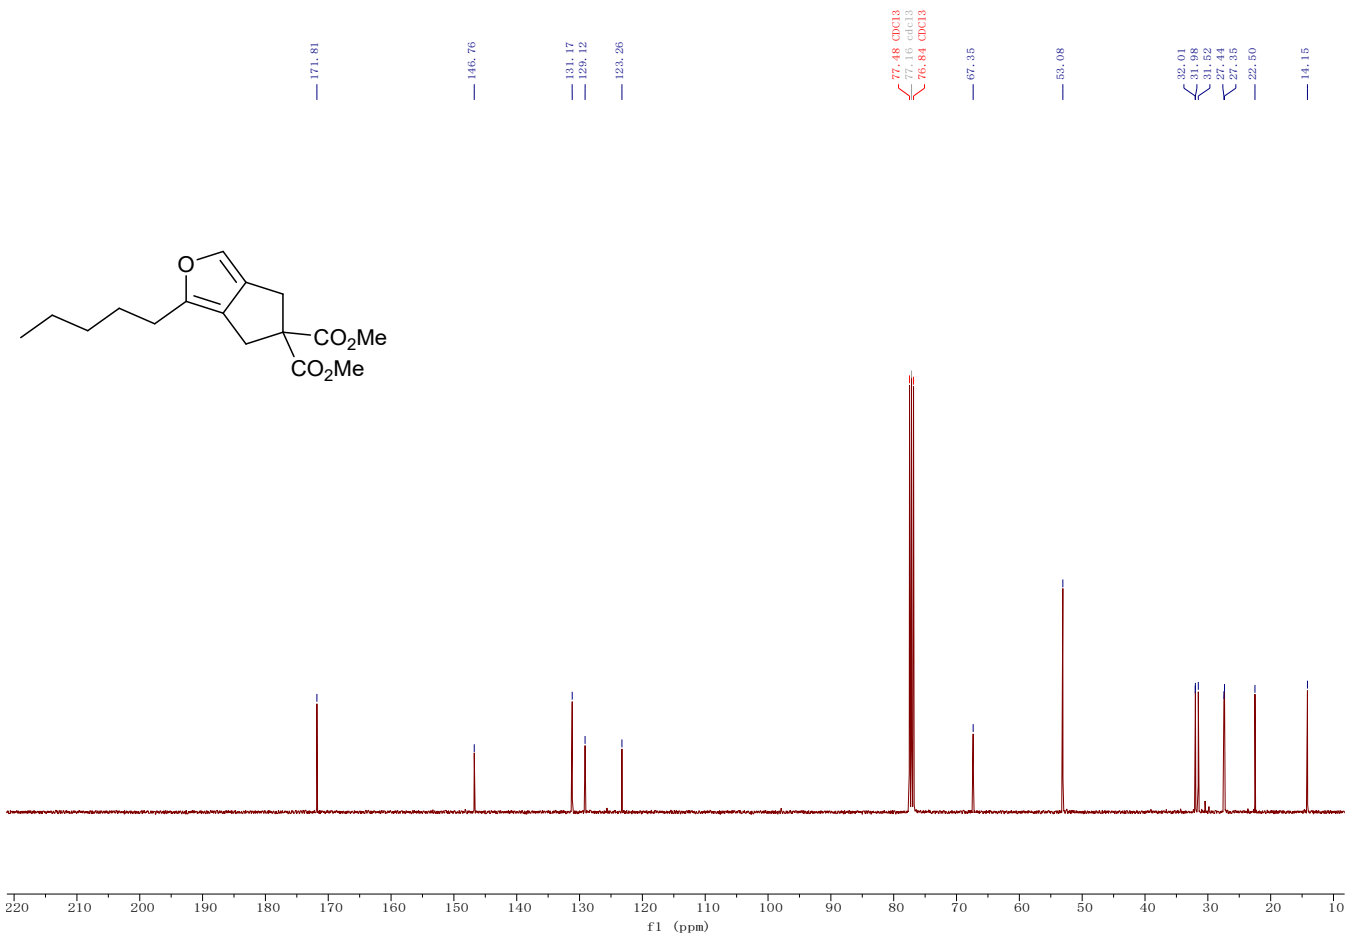

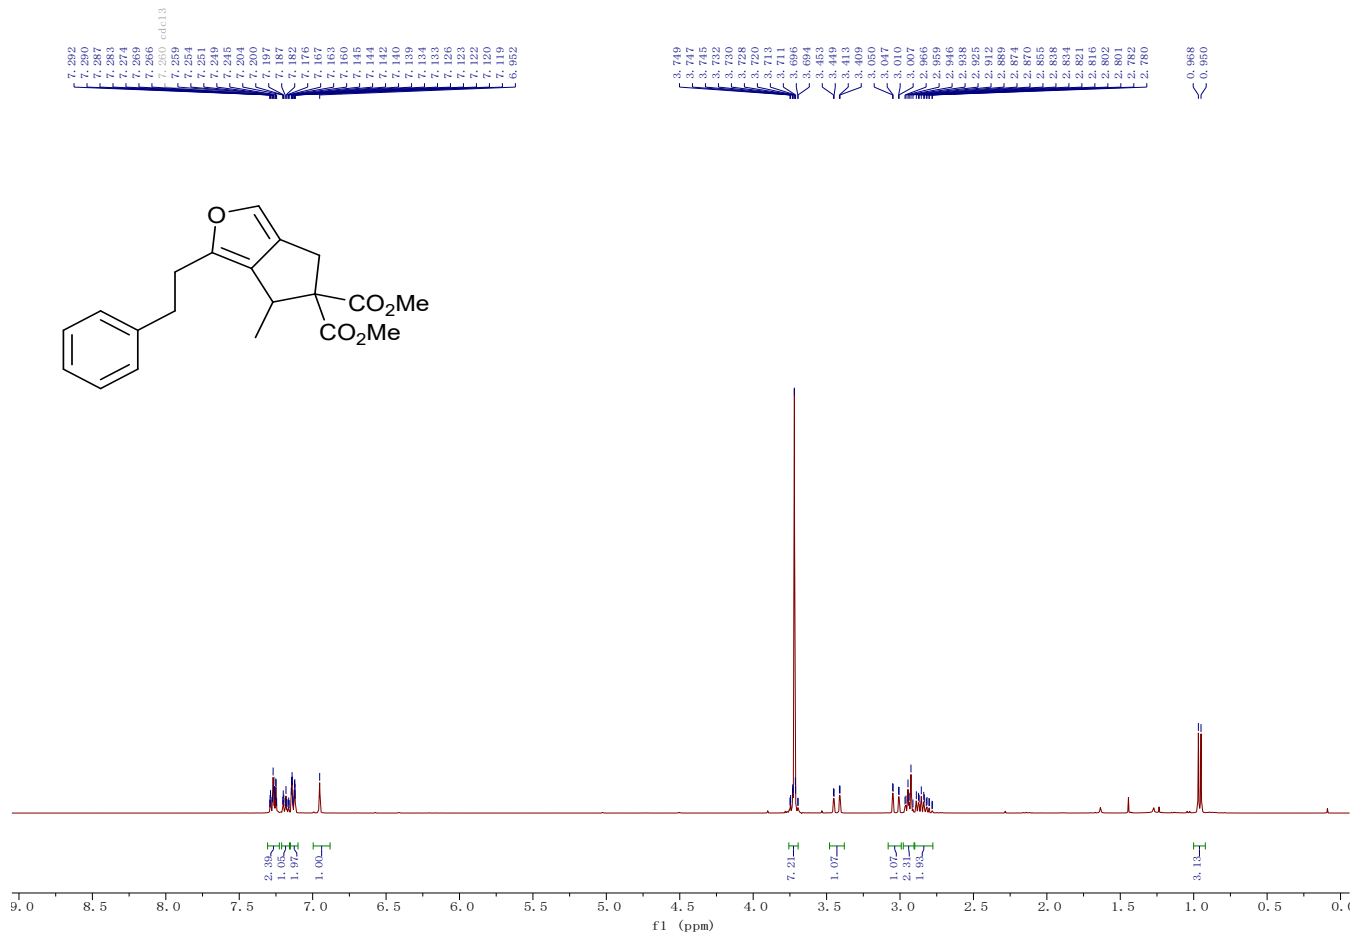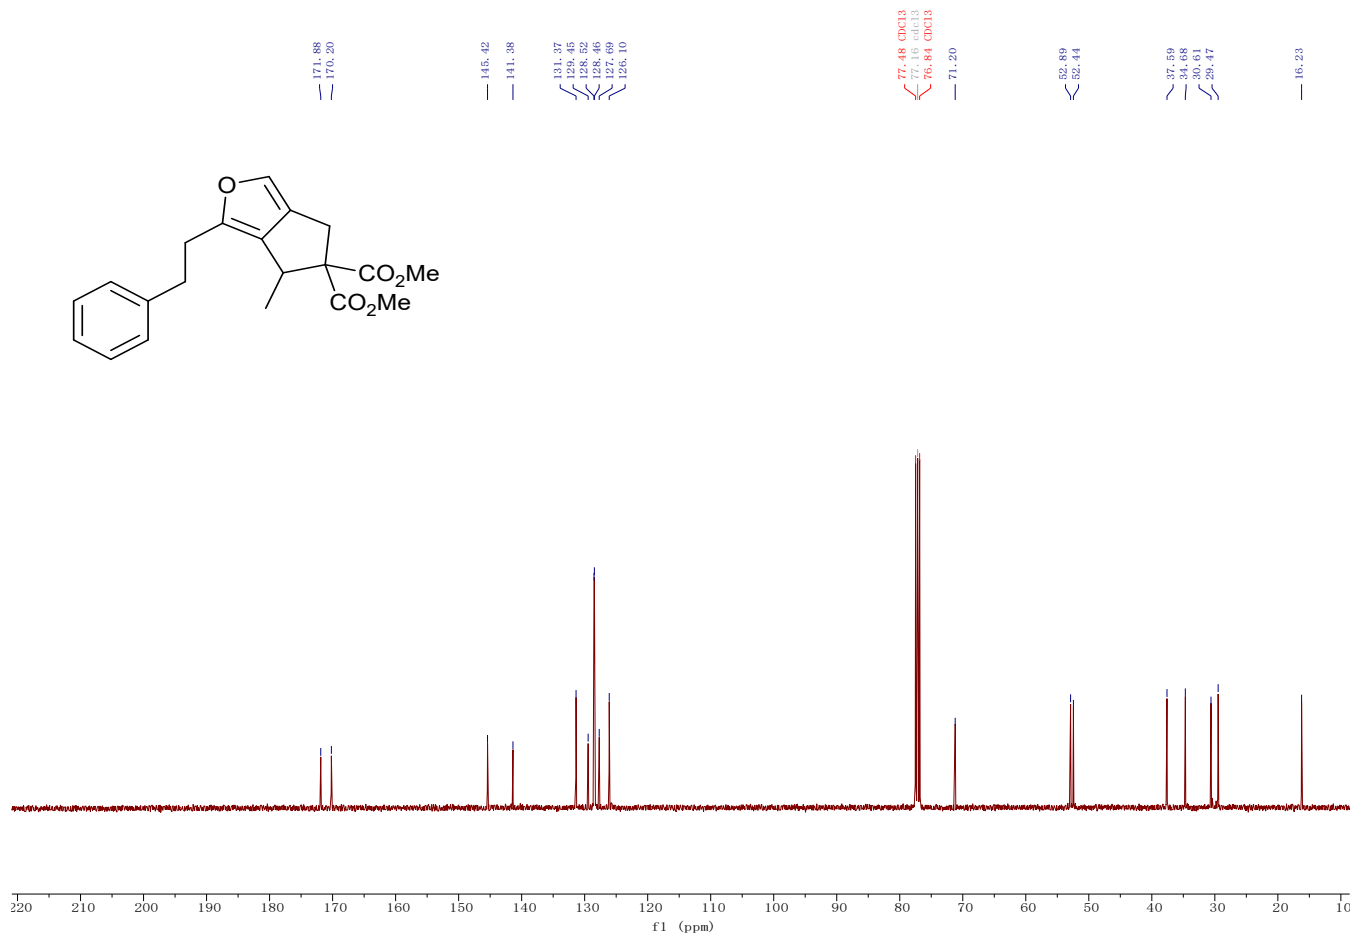

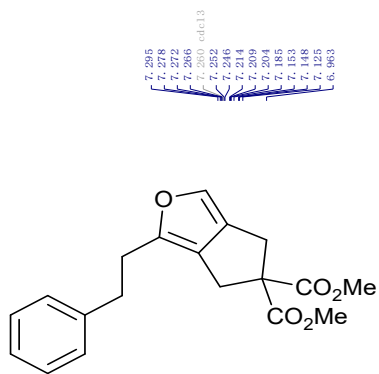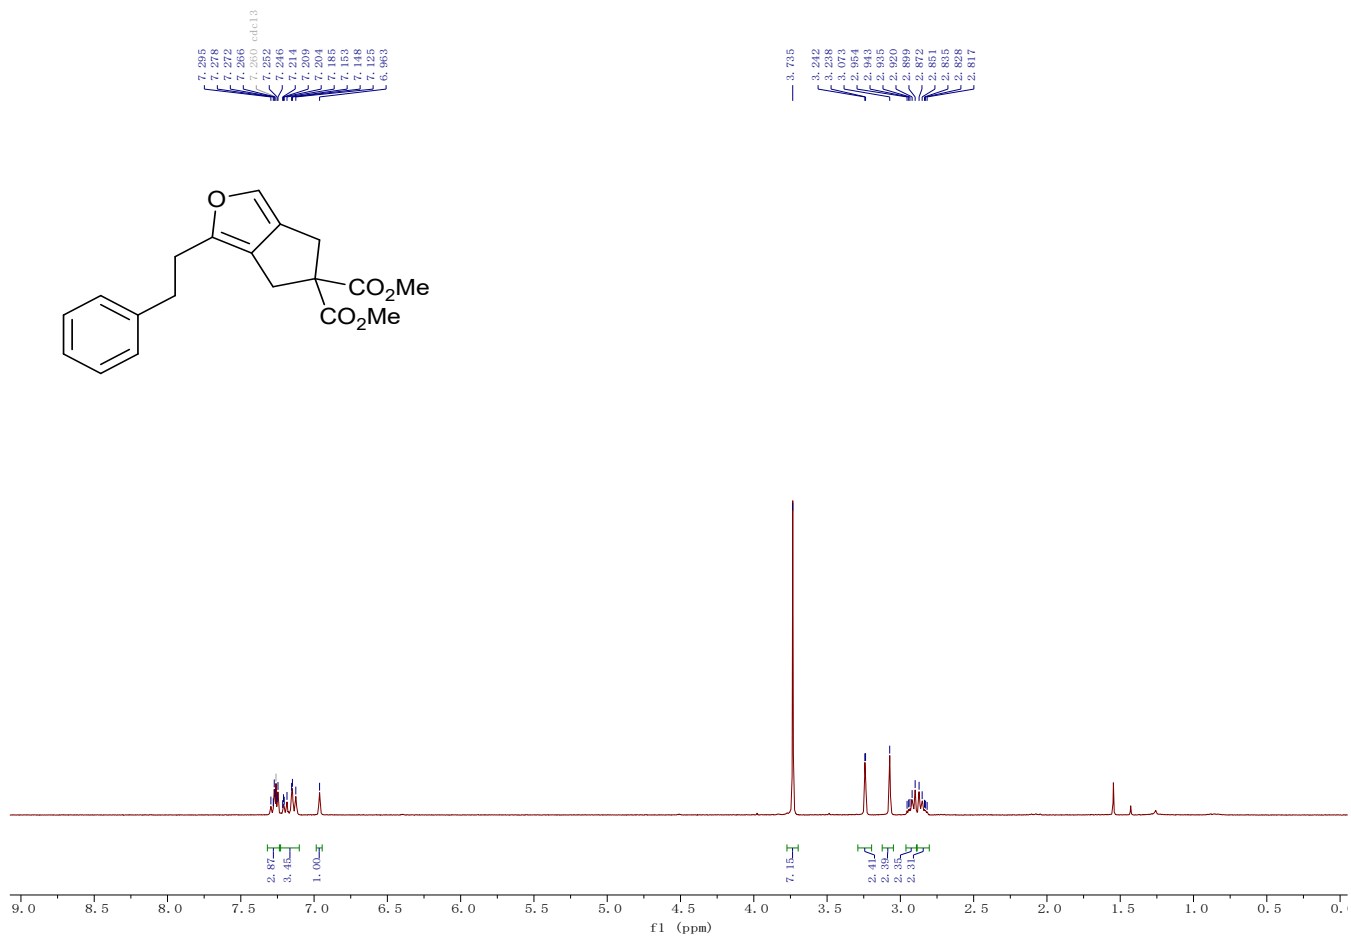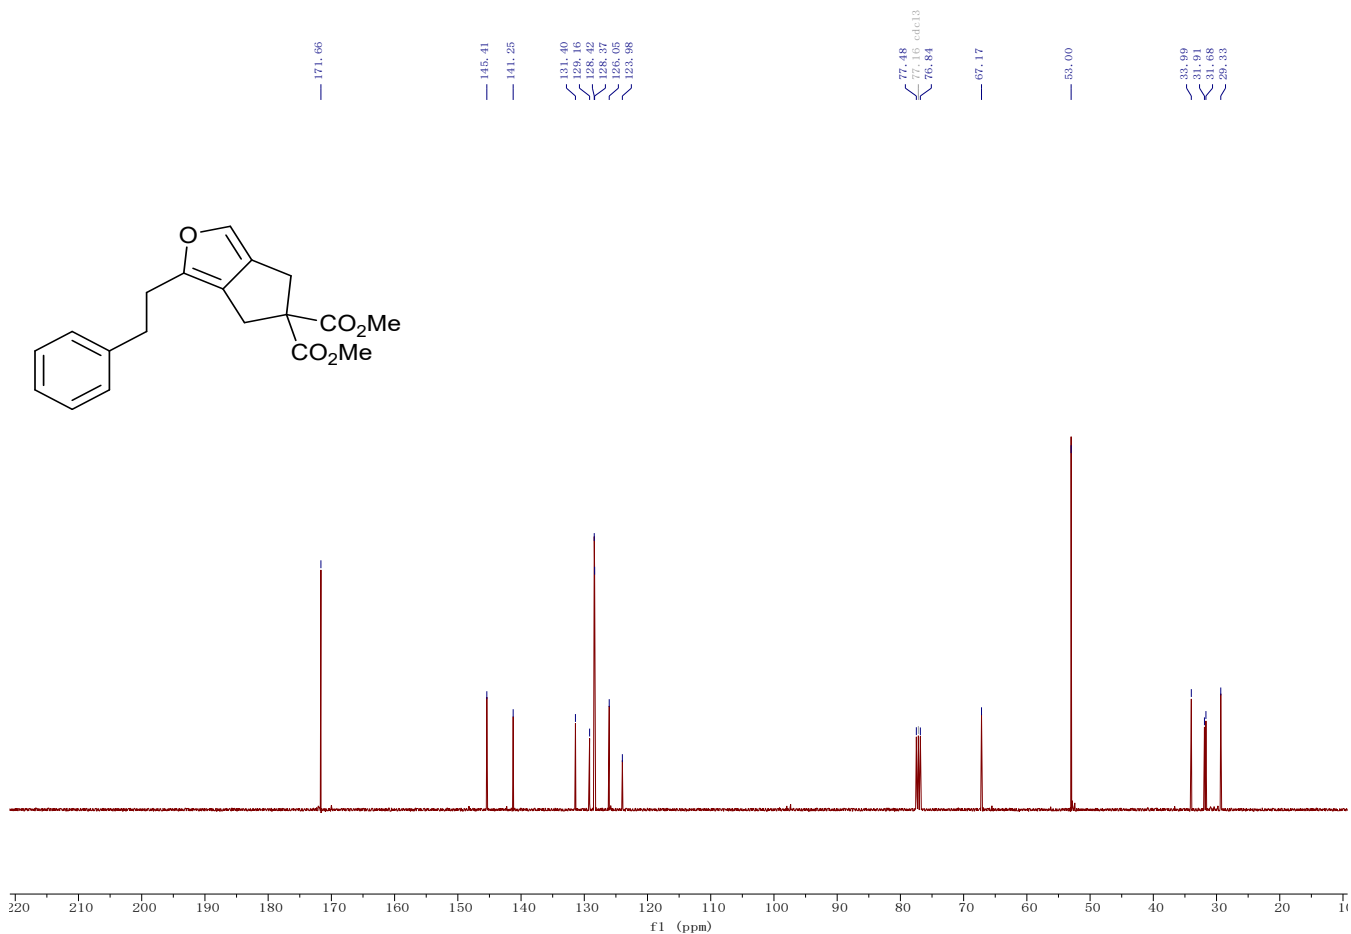

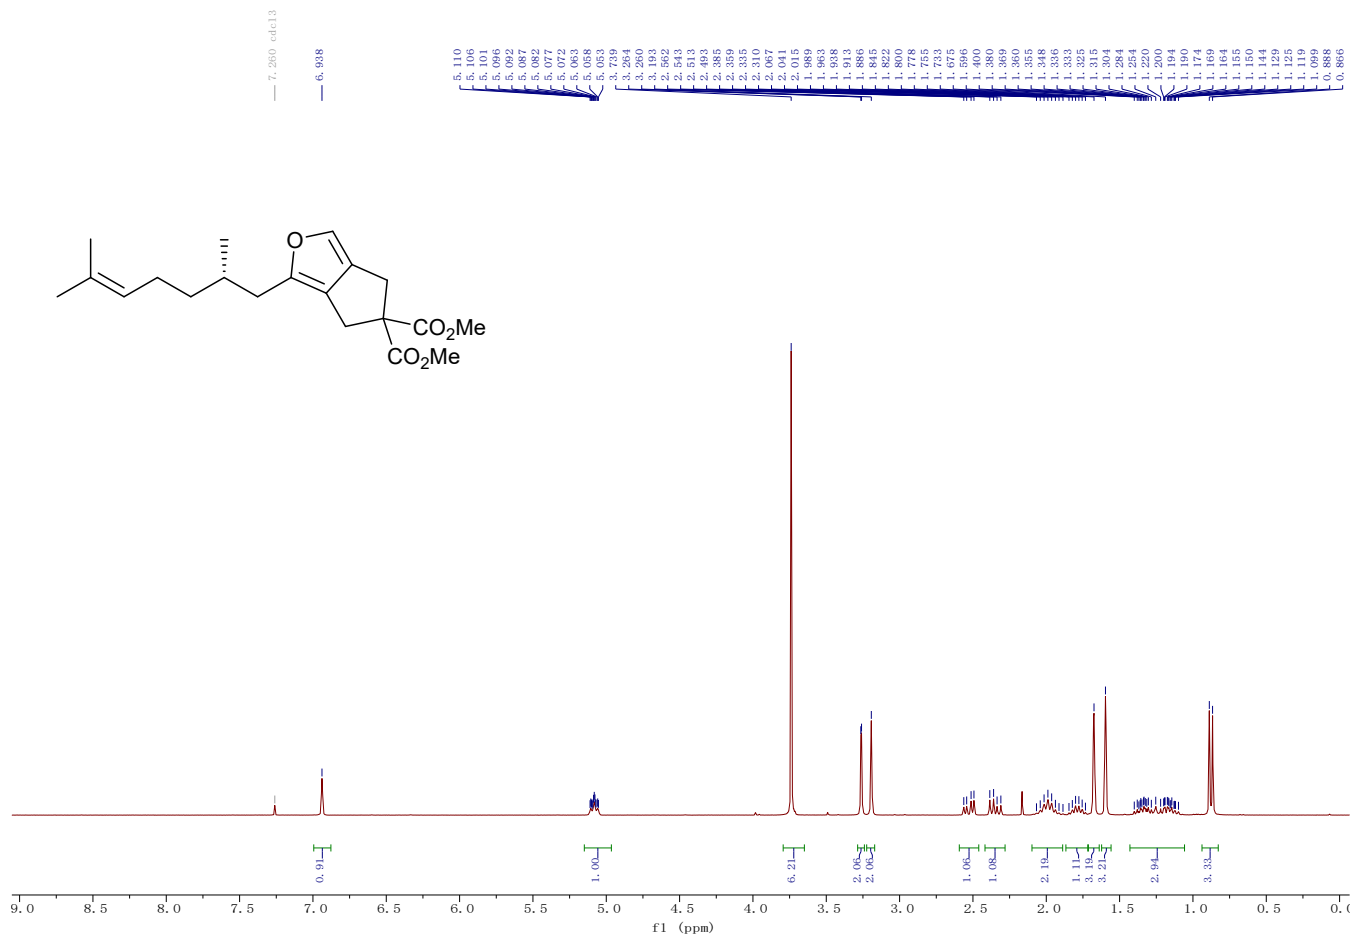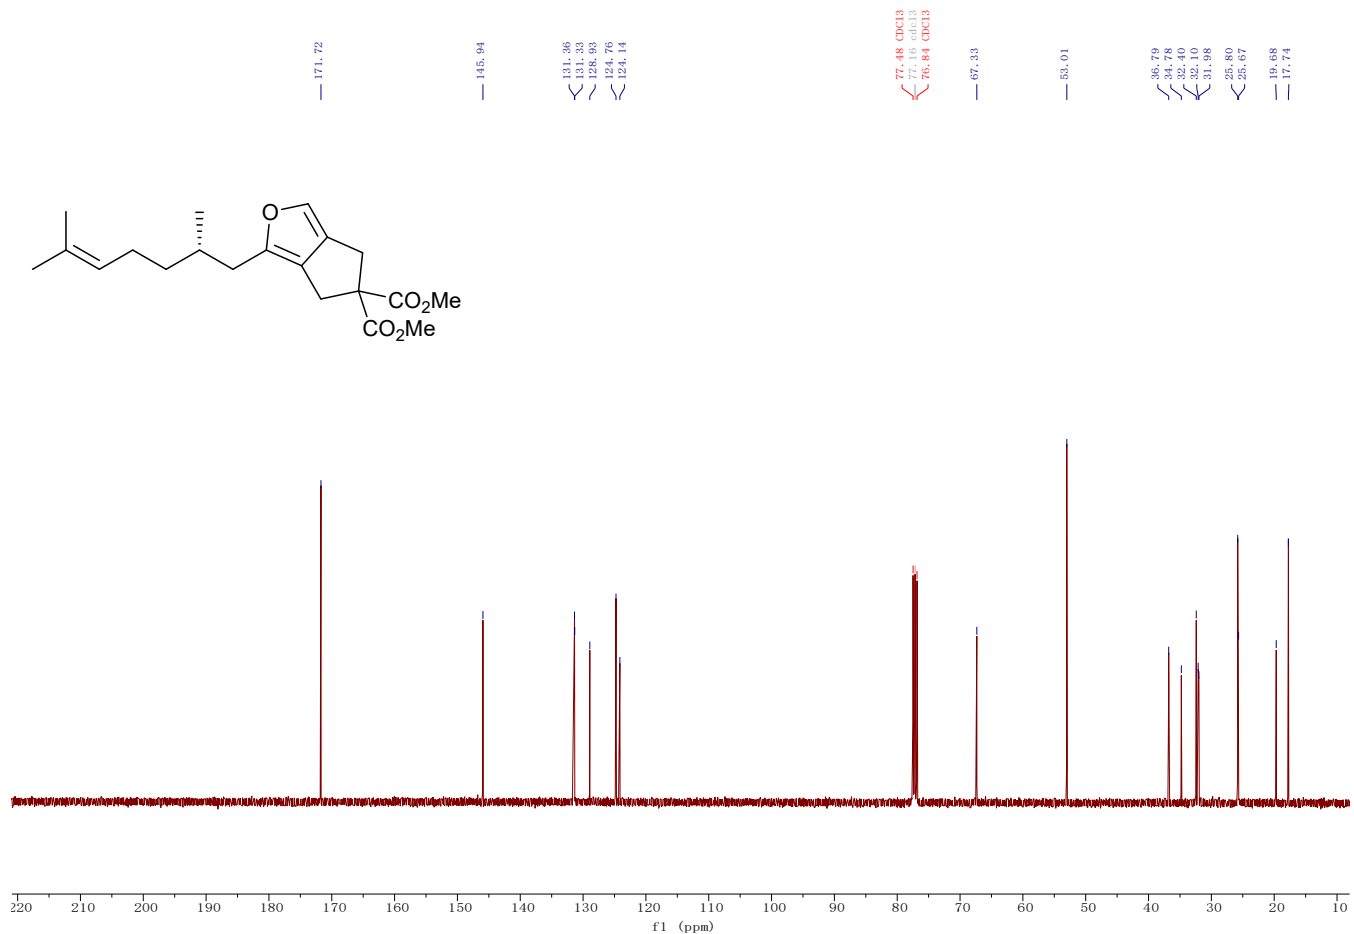

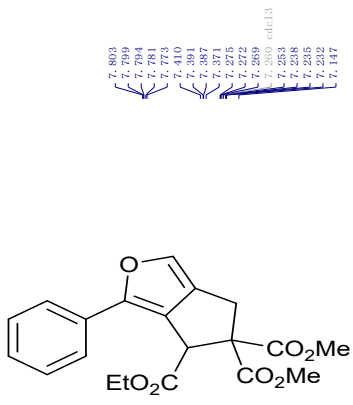

4.844  
4.168  
4.150  
4.132  
4.123  
4.114  
4.105  
4.086  
4.080  
4.072  
4.063  
4.054  
4.027  
3.778  
3.729  
3.724  
3.686  
3.685  
3.385  
3.345

1.175  
1.157  
1.140

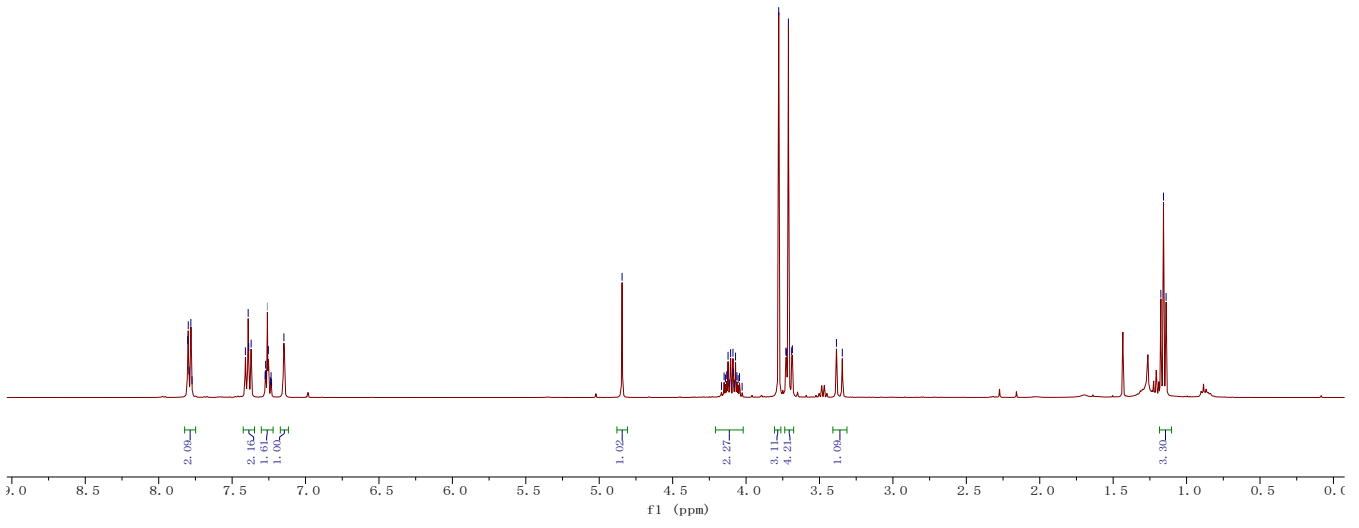

170.34  
170.18  
169.14  
146.05  
133.10  
130.30  
130.24  
128.61  
127.46  
126.59  
123.57

77.48 CDCl<sub>3</sub>  
77.15 CDCl<sub>3</sub>  
76.84 CDCl<sub>3</sub>  
71.19

61.57  
53.05  
52.04  
49.88

30.89

14.05

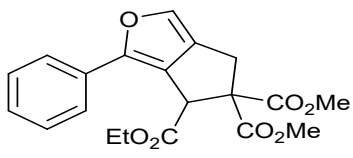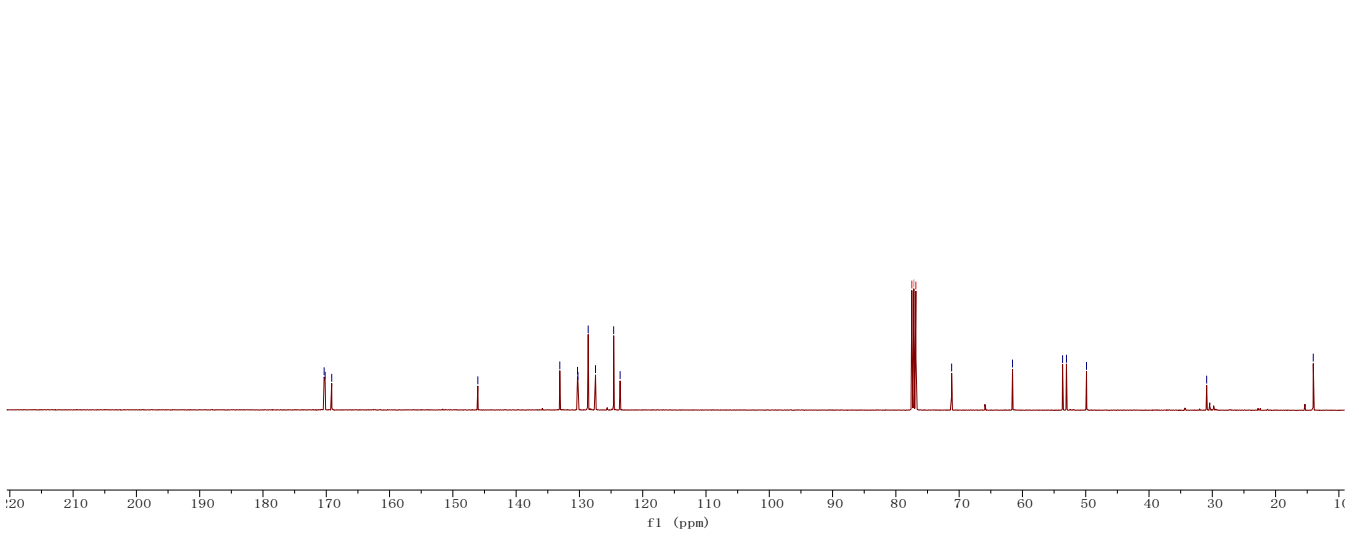

7.685 CDCl3  
 3.783  
 3.704  
 3.703  
 3.701  
 3.698  
 3.696  
 3.694  
 3.693  
 3.691  
 3.689  
 3.686  
 3.685  
 3.683  
 3.676  
 3.673  
 3.672  
 3.665  
 3.663  
 3.660  
 3.659  
 3.657  
 3.655  
 3.650  
 3.649  
 3.647  
 3.645  
 3.641  
 3.636  
 3.634  
 3.630  
 3.627  
 3.627  
 3.622  
 3.617  
 3.380  
 3.329  
 3.329  
 3.326  
 3.320  
 3.313  
 3.085  
 3.078  
 2.653  
 2.649  
 2.639  
 2.601  
 2.593  
 2.580  
 2.442  
 2.442  
 2.422  
 2.422  
 2.414  
 2.407  
 2.288  
 2.288  
 2.256  
 2.251  
 2.240  
 2.232  
 2.233  
 2.233  
 2.144  
 2.144  
 2.135  
 2.133  
 2.132  
 2.112  
 2.111  
 2.100  
 2.091  
 2.088  
 2.070  
 2.070  
 1.940  
 1.927  
 1.927  
 1.915  
 1.915  
 1.909  
 1.904  
 1.897  
 1.889  
 1.889  
 1.876  
 1.876  
 1.866  
 1.859  
 1.847  
 1.847  
 1.834  
 1.834  
 1.822  
 1.822  
 0.717  
 0.709  
 0.672  
 0.672  
 0.666  
 0.666  
 0.642  
 0.637  
 0.637  
 0.629  
 0.629  
 0.622  
 0.622  
 0.598  
 0.598

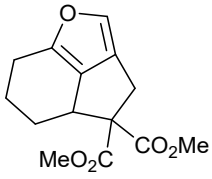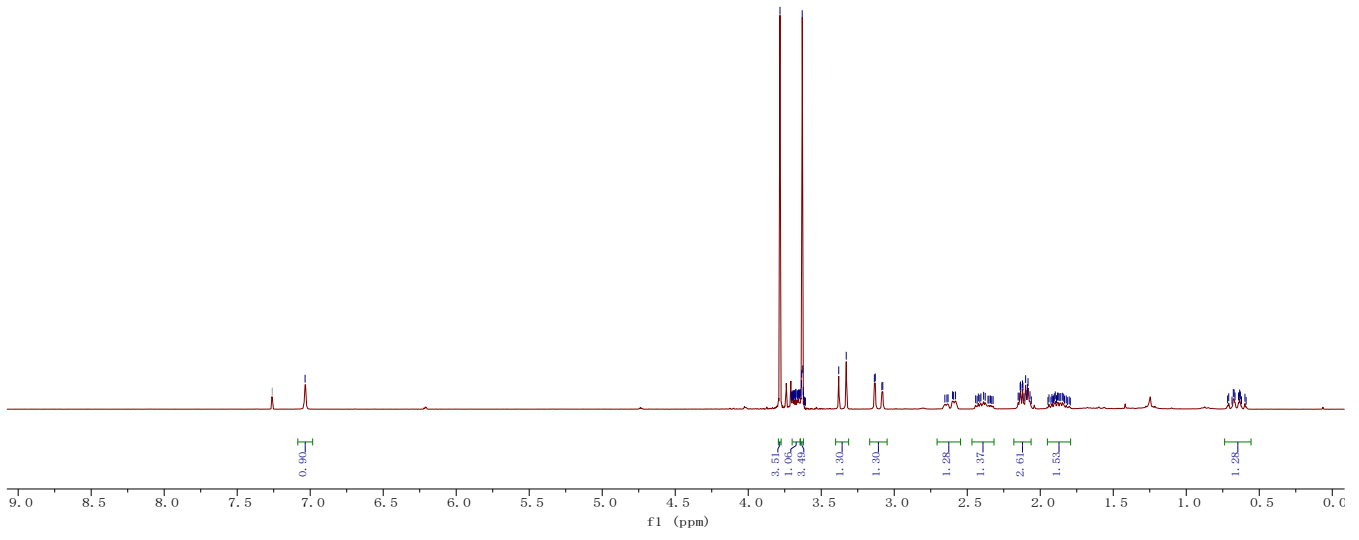

171.49  
 170.44  
 147.78  
 134.85  
 133.40  
 126.48  
 77.48 CDCl3  
 77.15 CDCl3  
 76.84 CDCl3  
 75.00  
 52.85  
 52.15  
 40.64  
 35.56  
 27.62  
 25.20  
 23.83

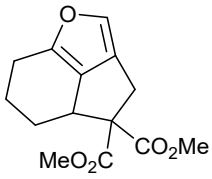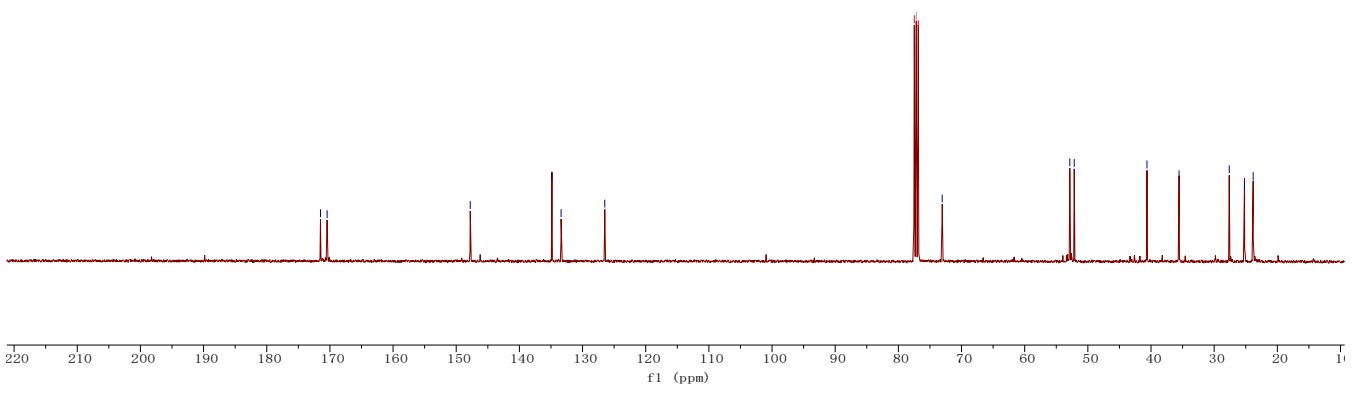

7.280 cde13

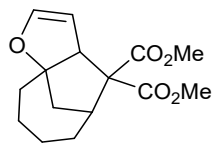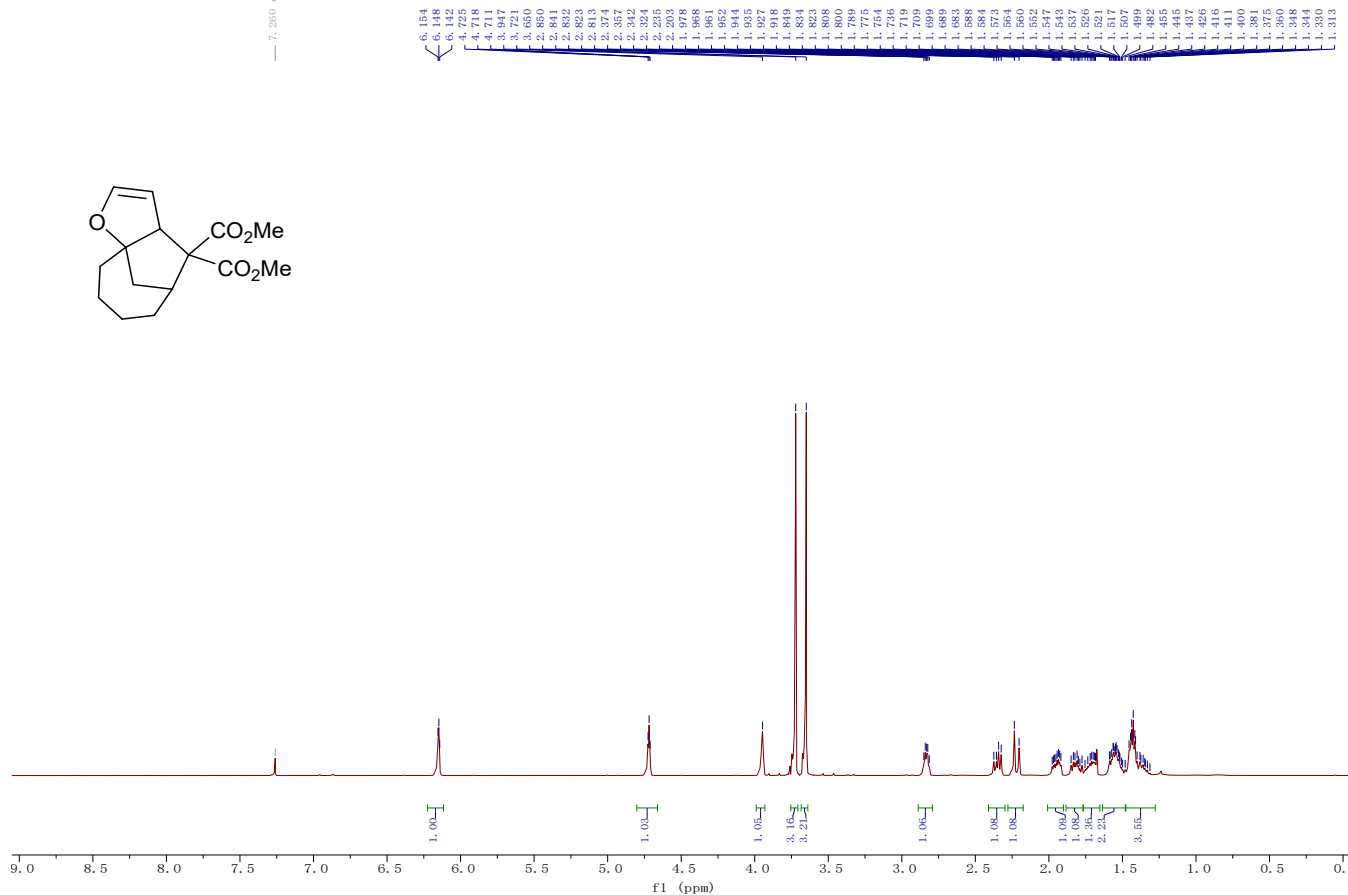

171.05, 170.91, 144.64, 99.17, 96.37, 77.47, 77.15, 76.83, 69.51, 59.27, 52.43, 51.92, 42.30, 42.24, 37.55, 31.29, 24.02, 23.69

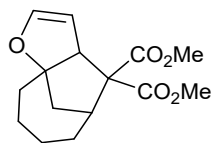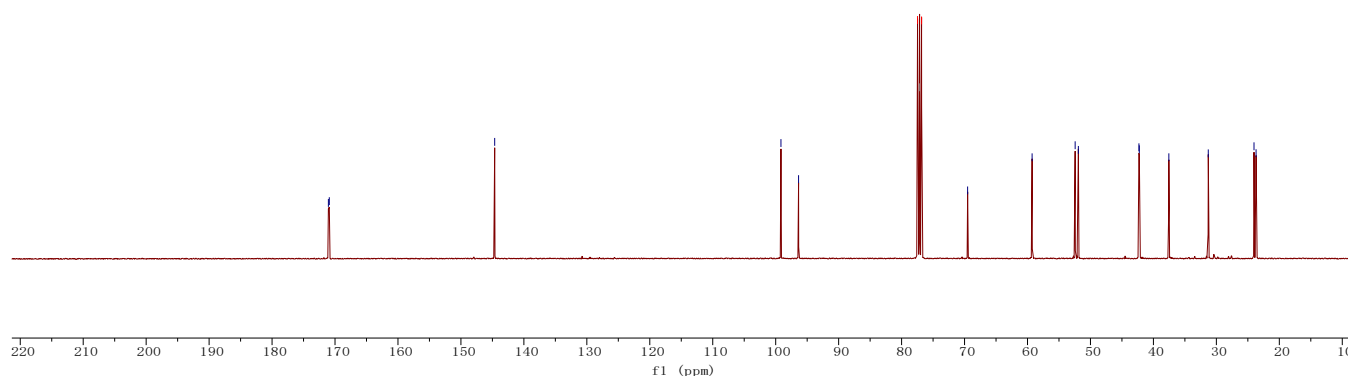



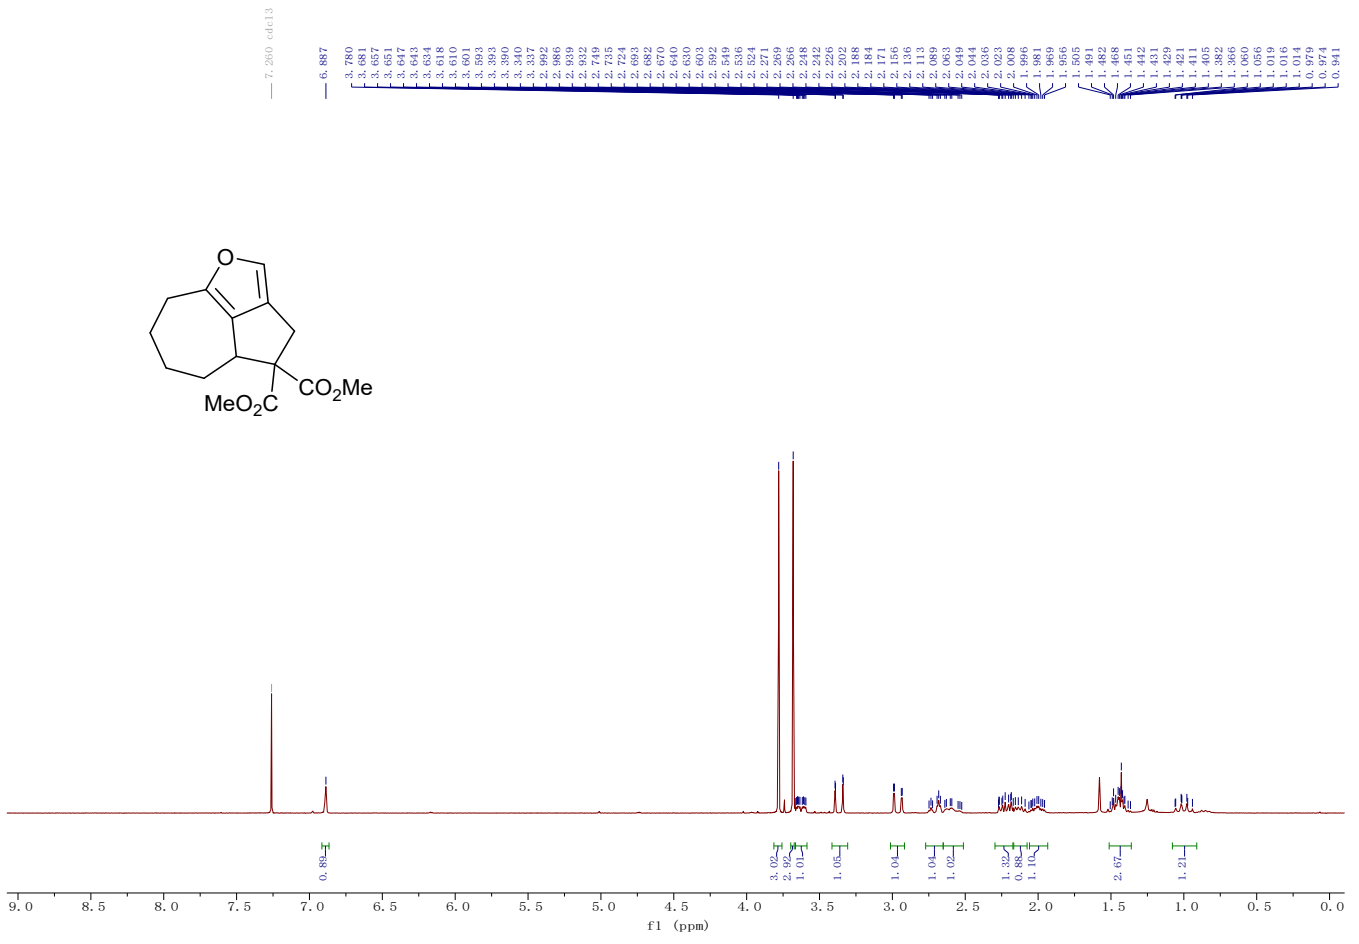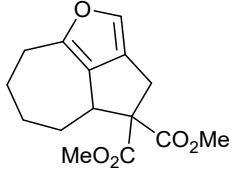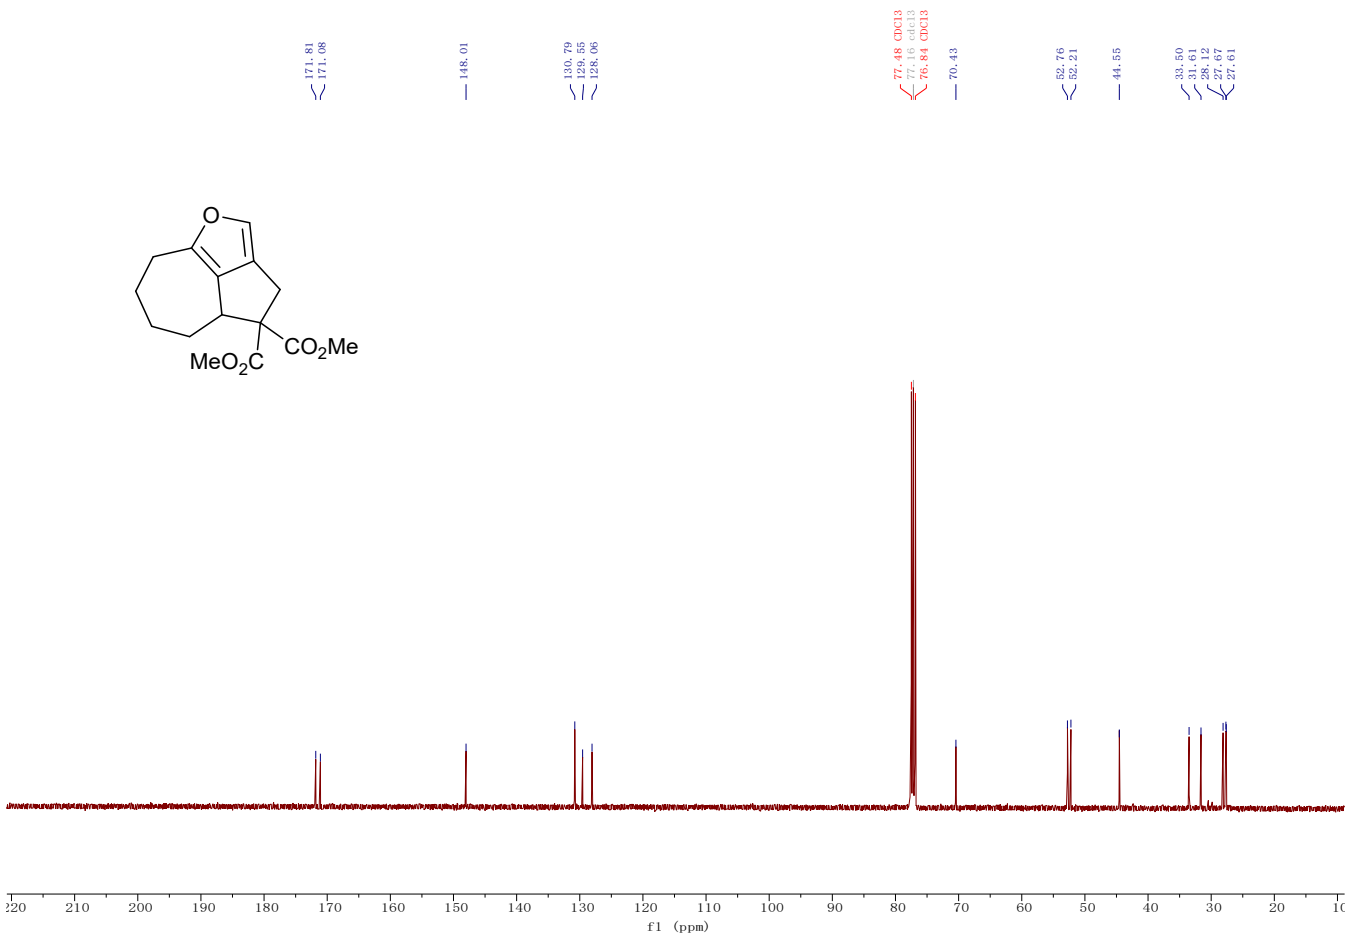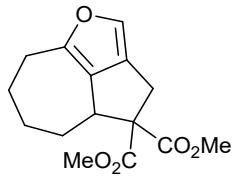

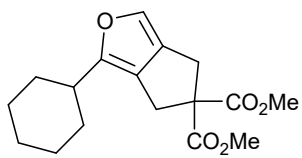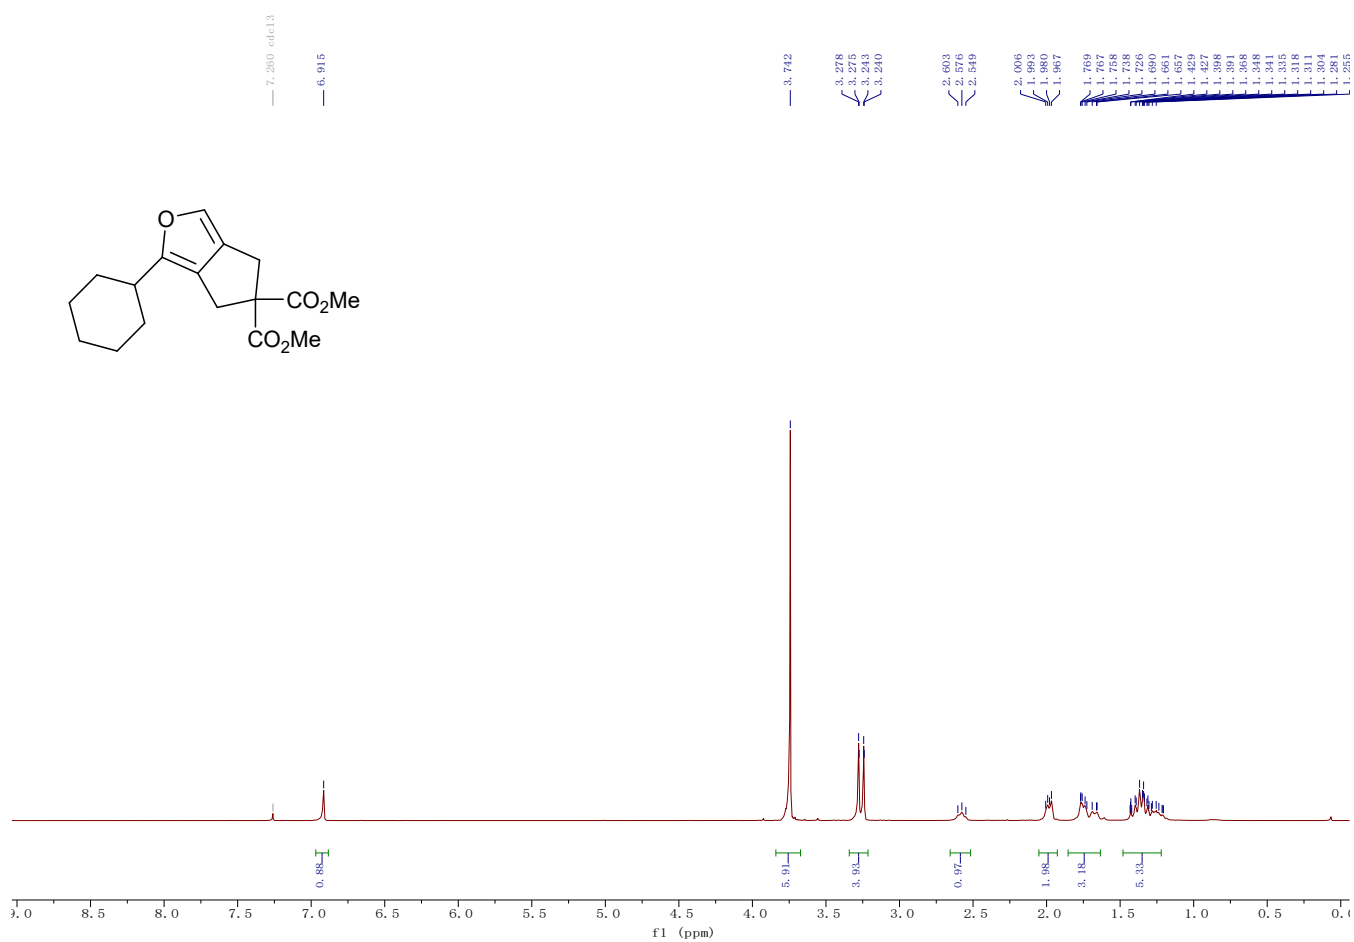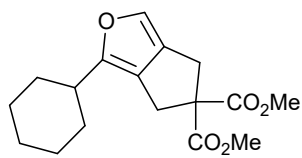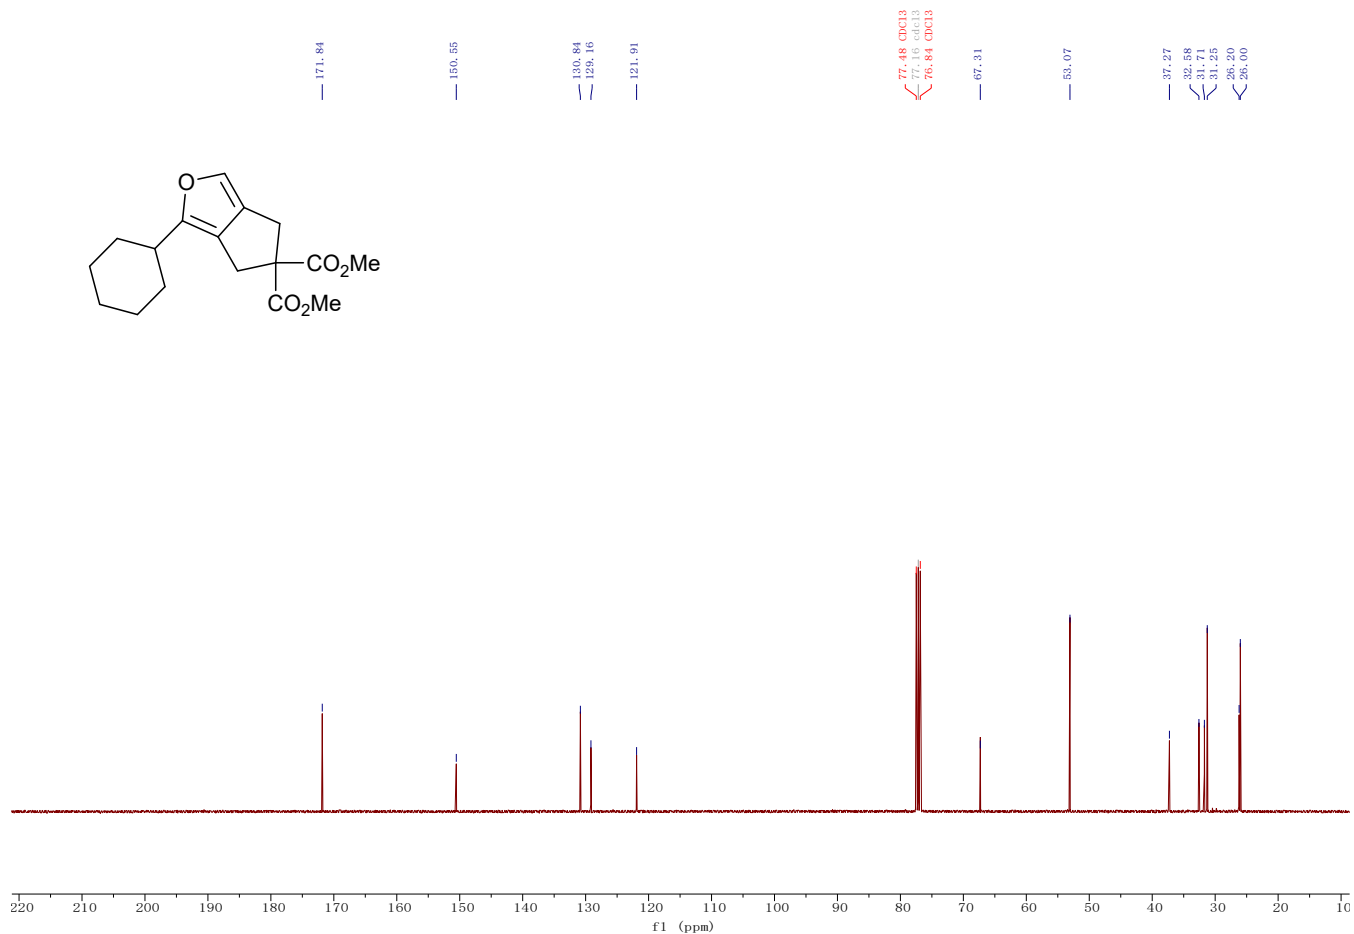

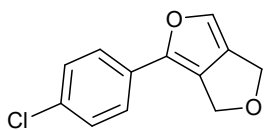

7.354  
7.286  
7.153

4.994  
4.858

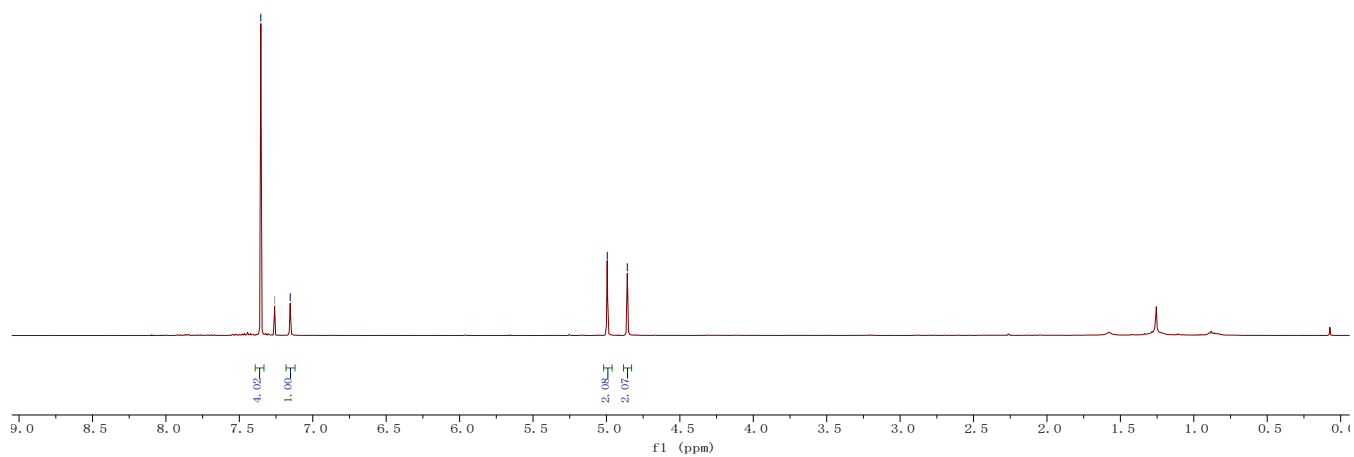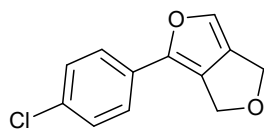

141.77  
132.88  
132.71  
130.54  
128.20  
127.10  
125.17

77.48 CDCl3  
77.15 CDCl3  
76.84 CDCl3

65.43  
65.58

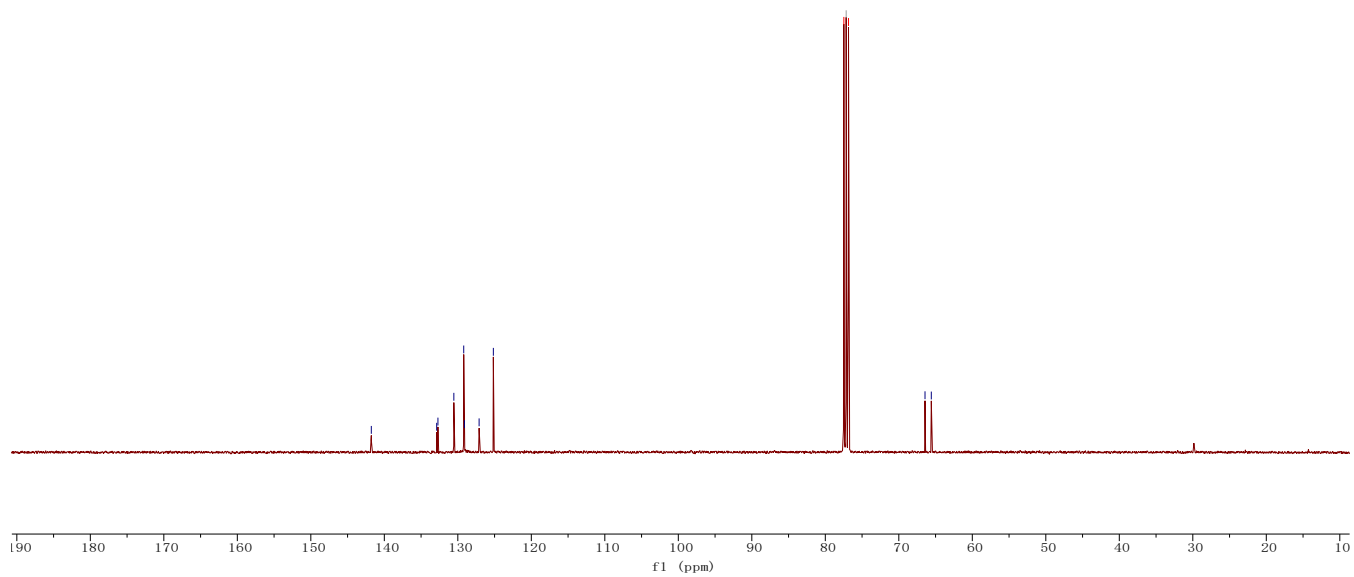

7.532  
7.527  
7.523  
7.519  
7.511  
7.508  
7.503  
7.498  
7.483  
7.476  
7.472  
7.465  
7.452  
7.423  
7.416  
7.410  
7.409  
7.406  
7.396  
7.391  
7.387  
7.378  
7.366  
7.347  
7.343  
7.333  
7.331  
7.325  
7.319  
7.311  
7.310  
7.305  
7.293  
7.260 cdCl3  
7.255  
7.251  
7.245  
7.239  
7.234  
7.229  
7.225  
7.215  
7.211  
7.208  
7.144

3.983  
3.928  
3.780

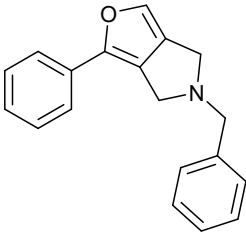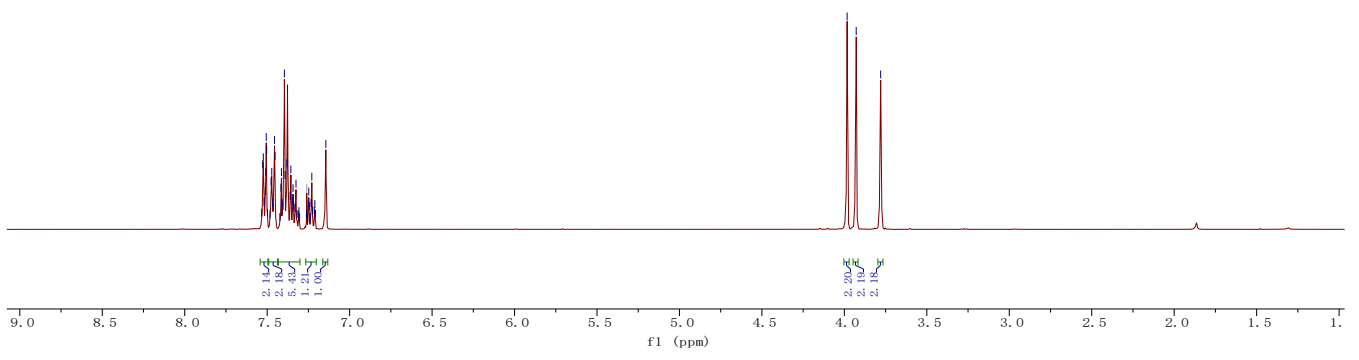

143.40  
138.07  
131.17  
131.16  
128.80  
128.76  
128.57  
127.31  
126.78  
126.65  
123.95

77.48 CDCl3  
77.16 cdCl3  
76.84 CDCl3

60.37  
52.21  
51.07

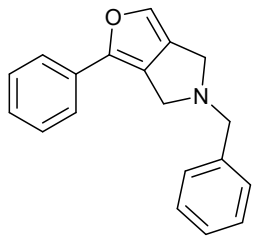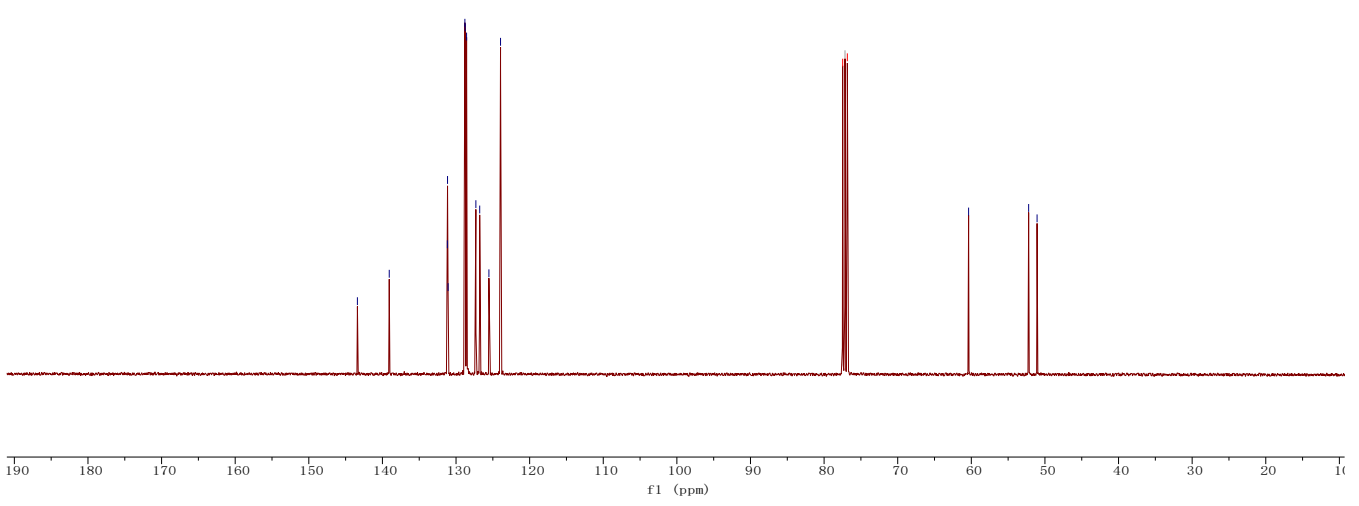

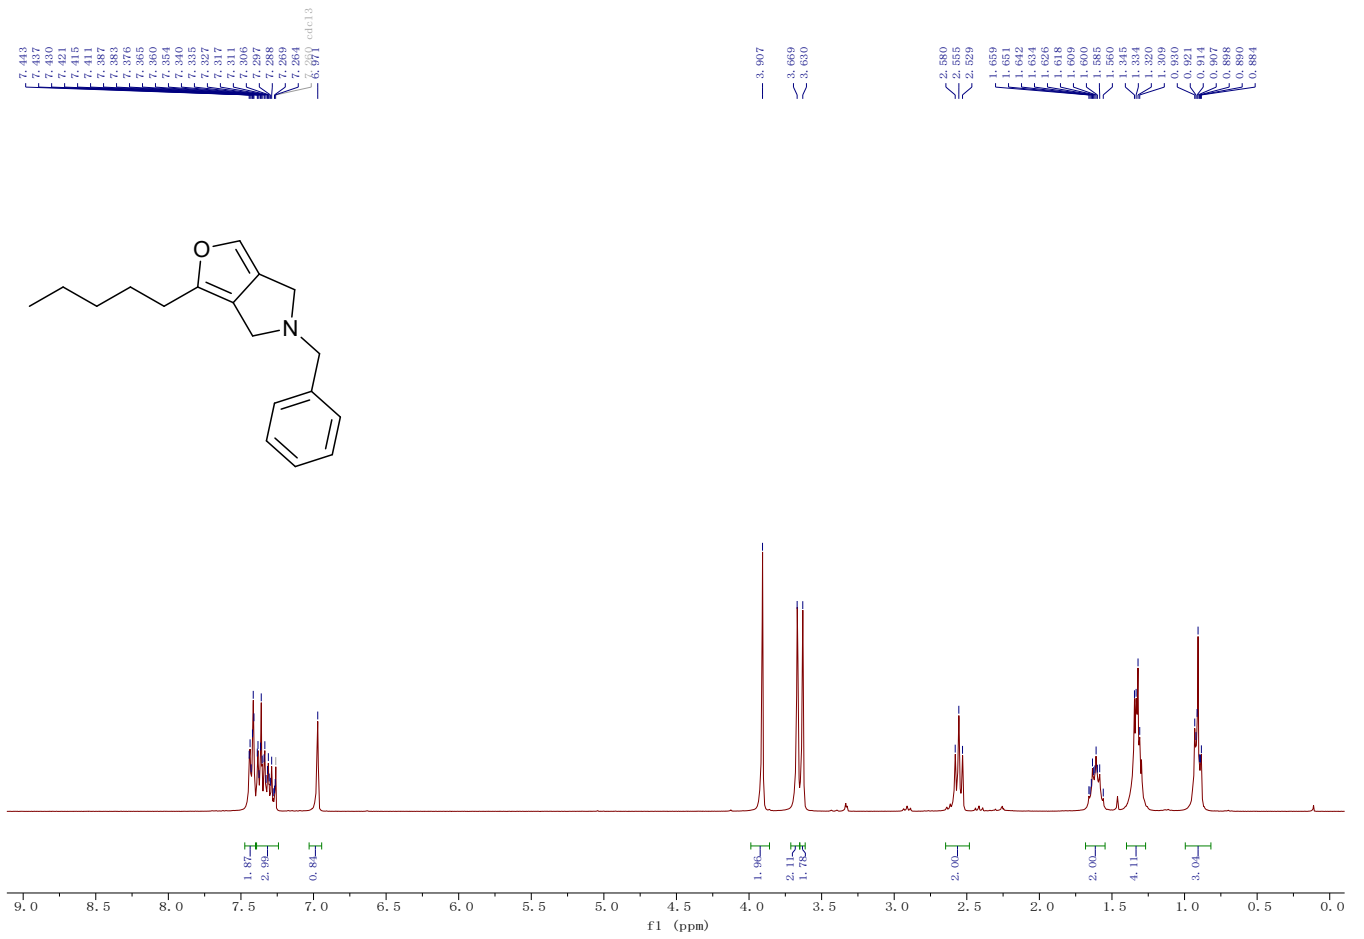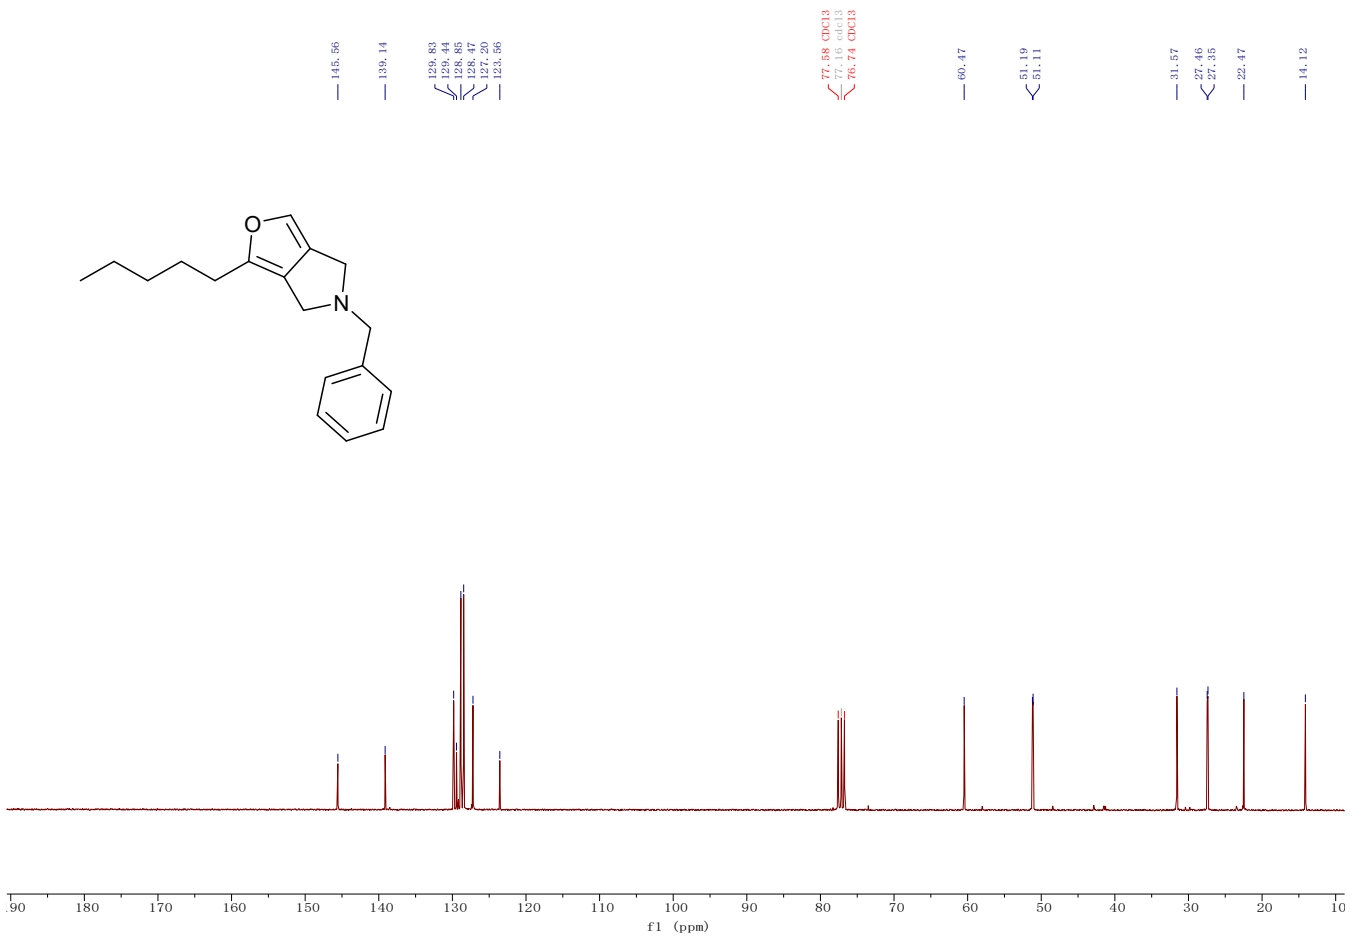

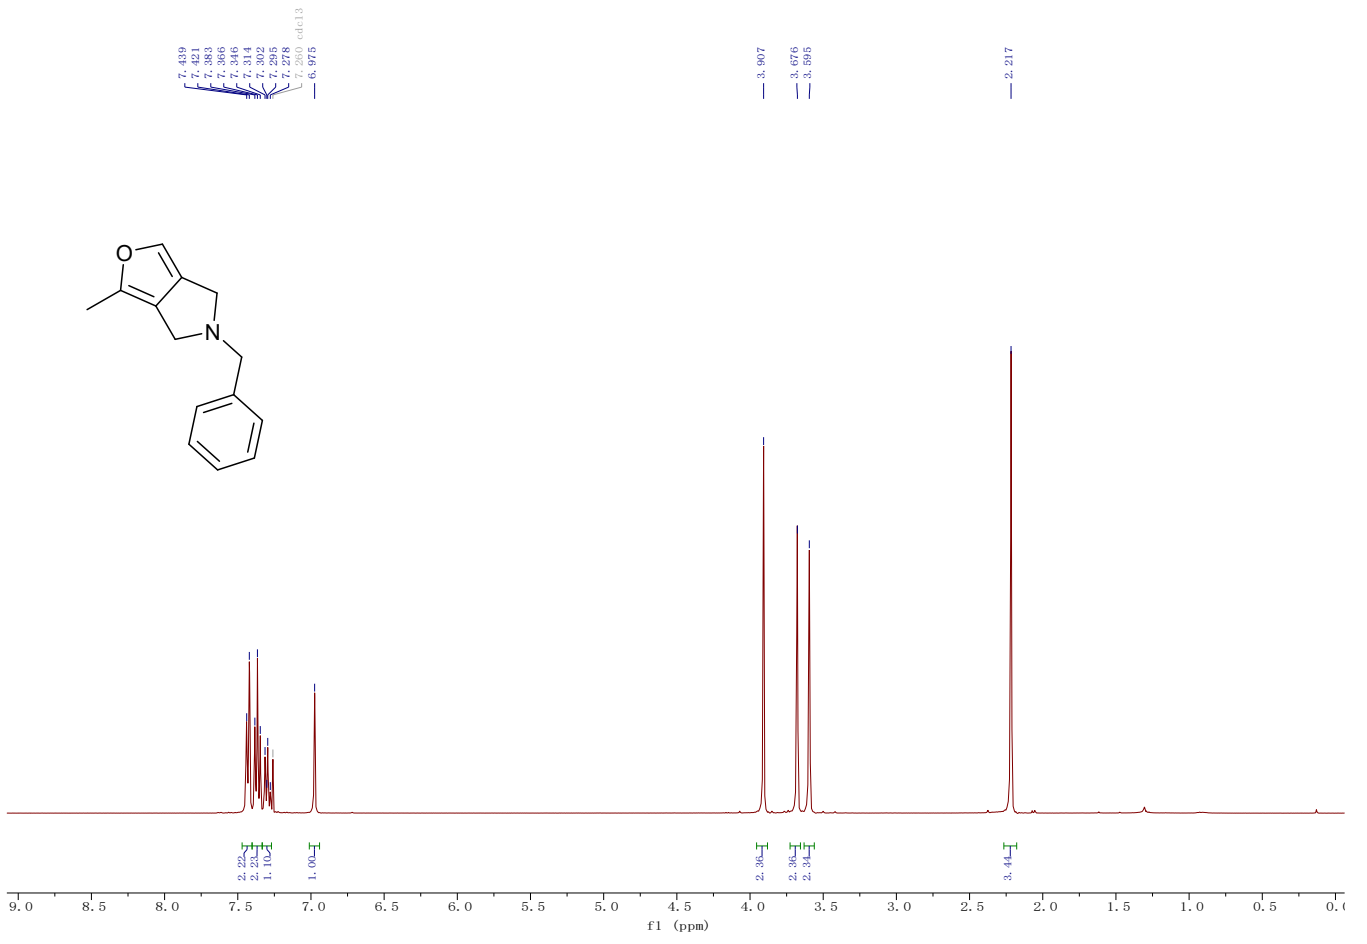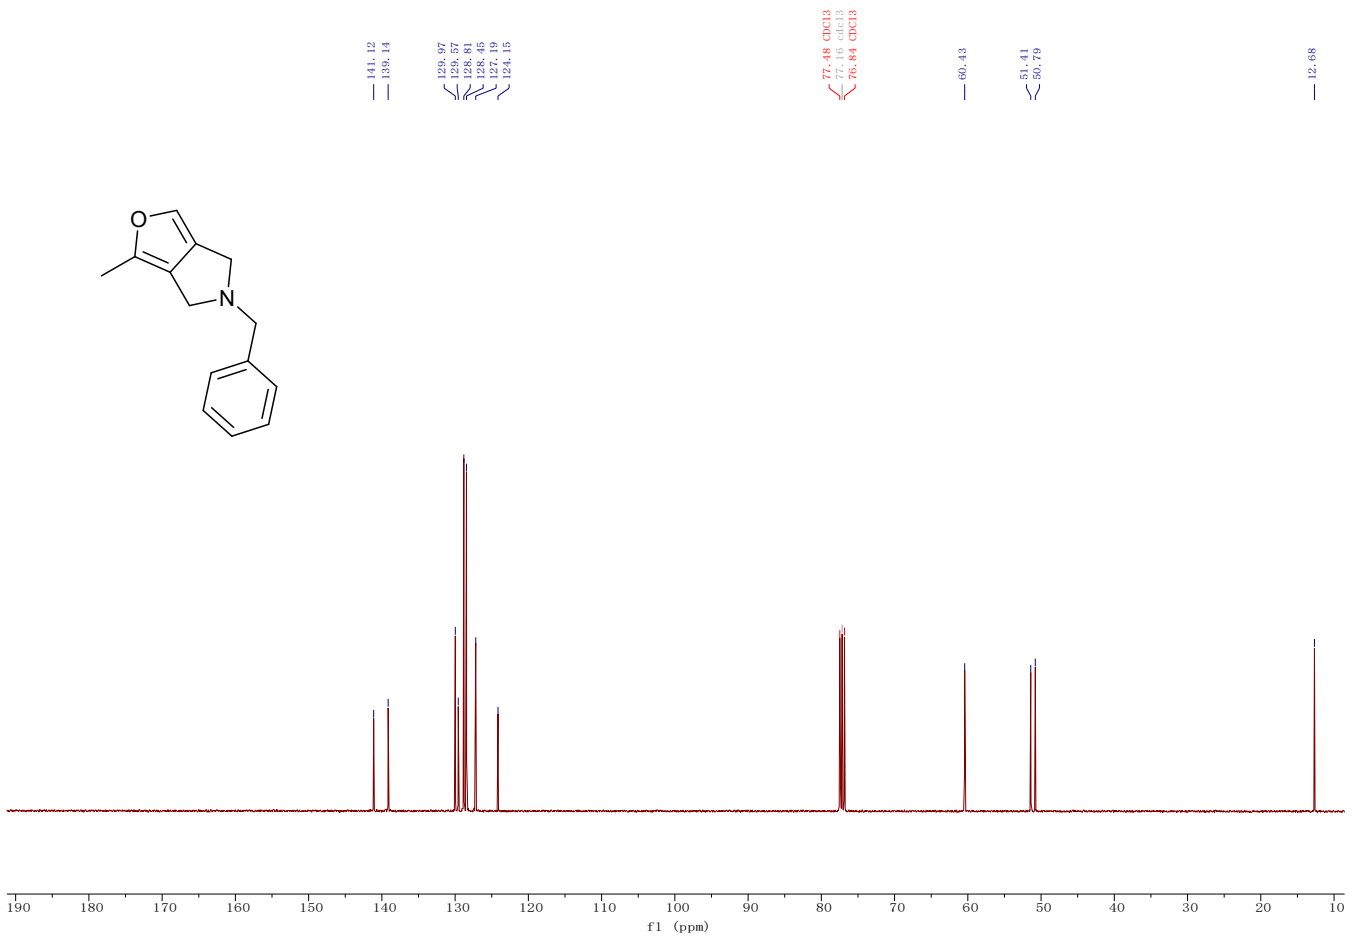

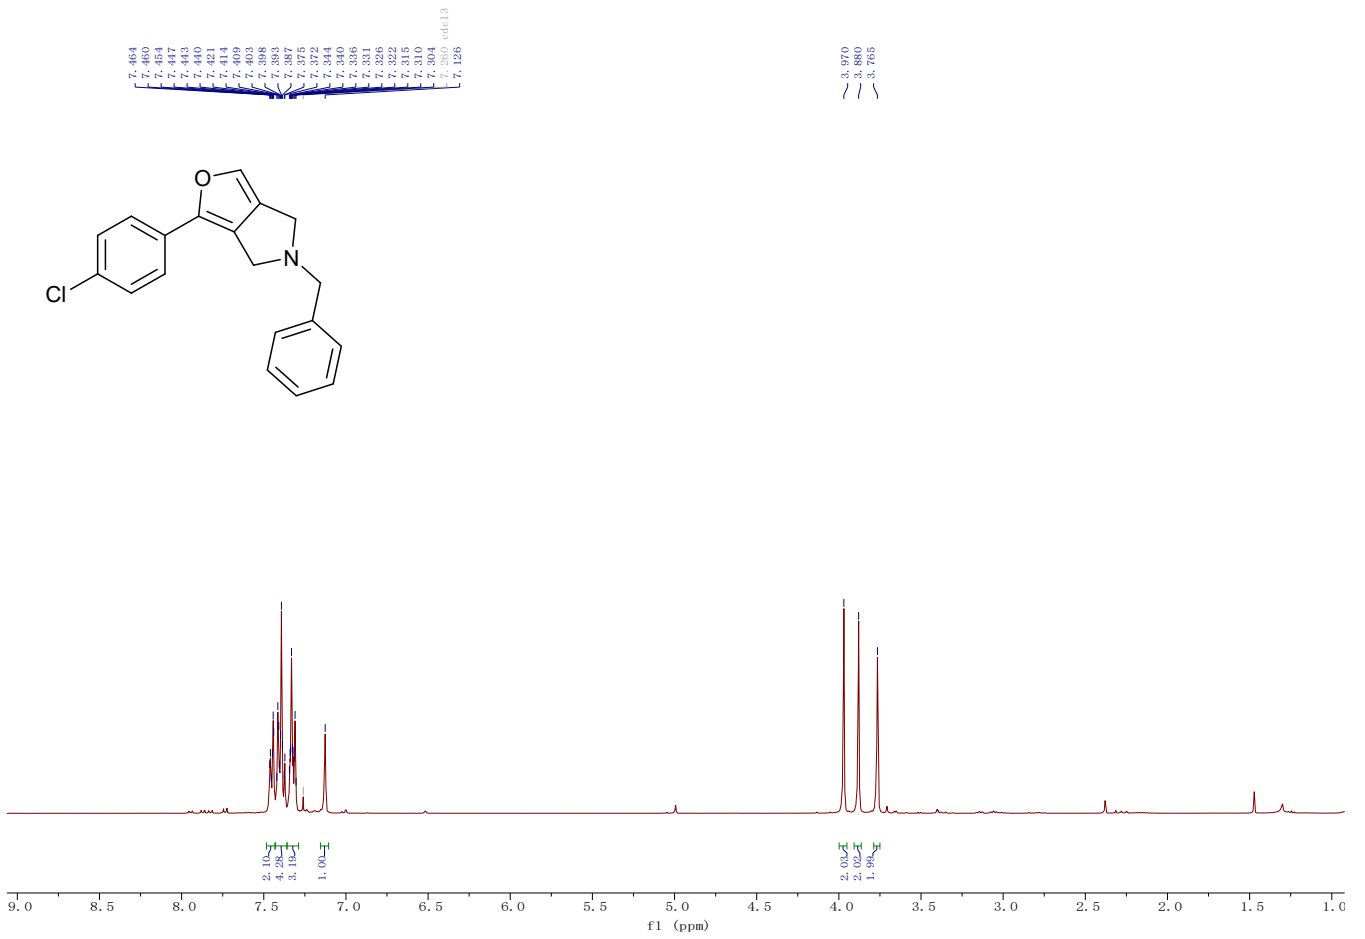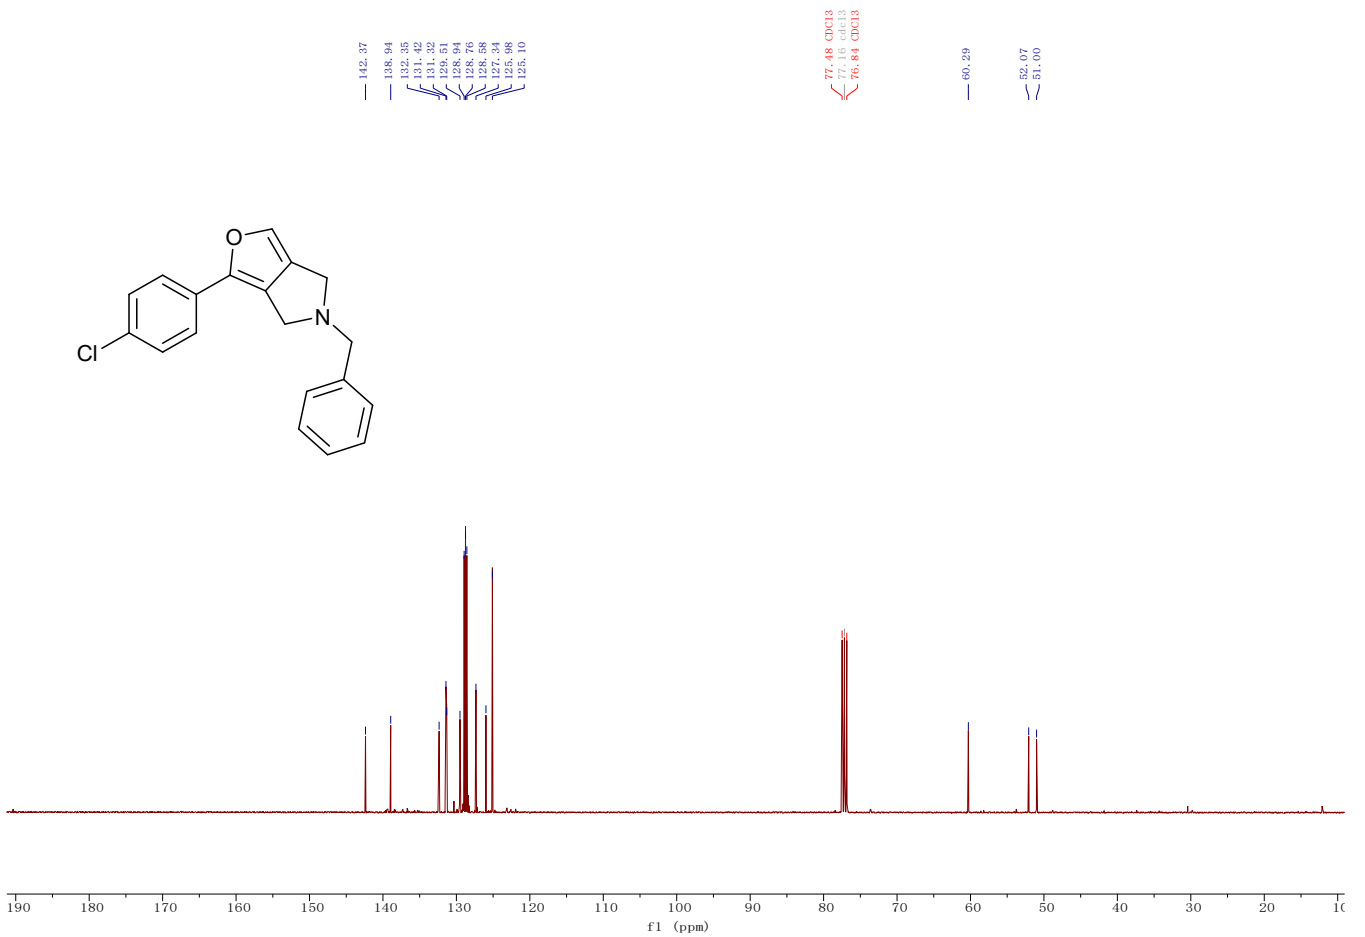

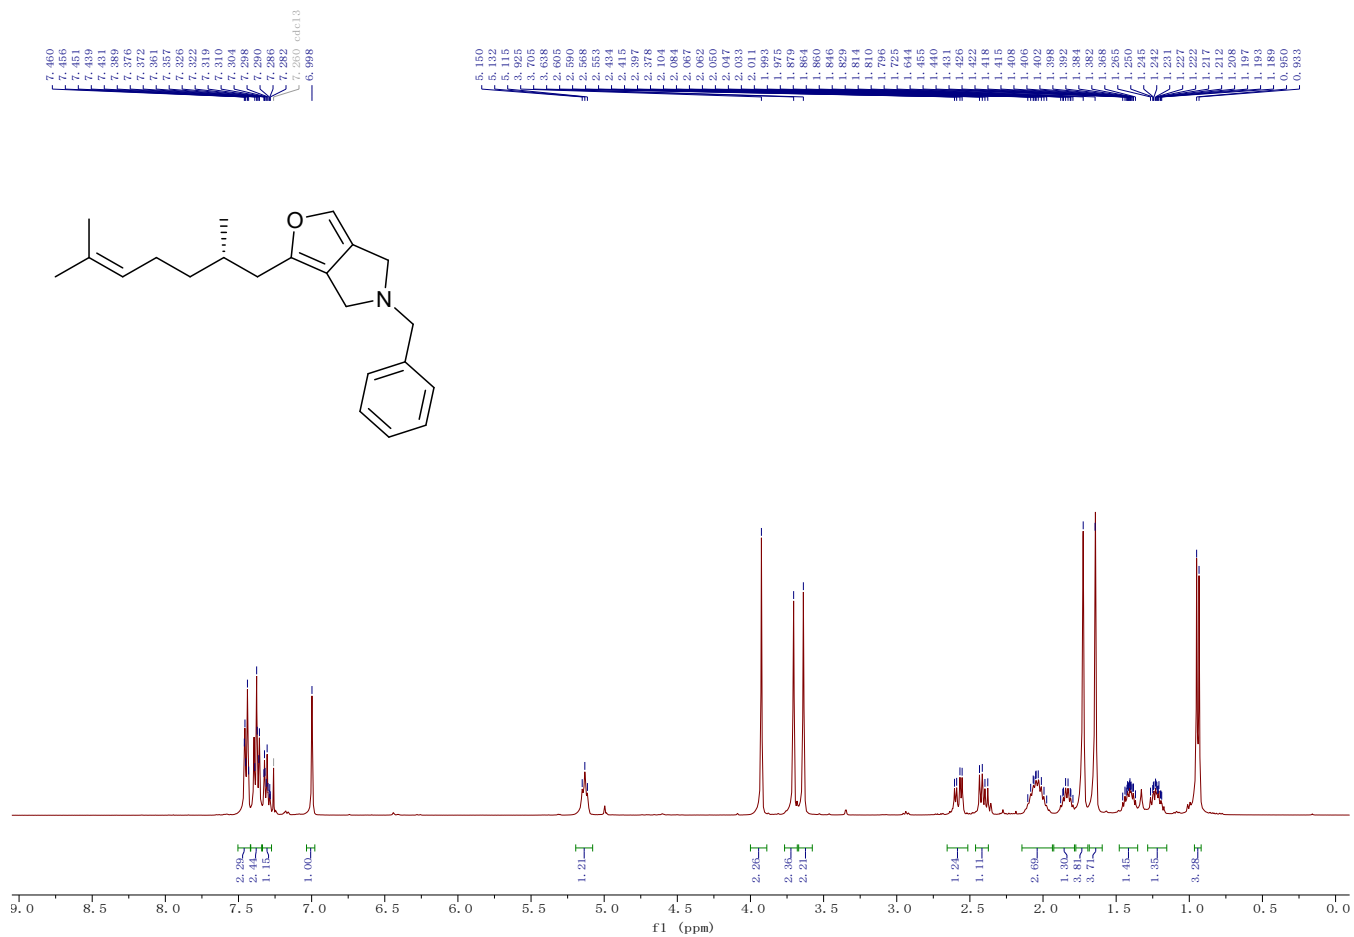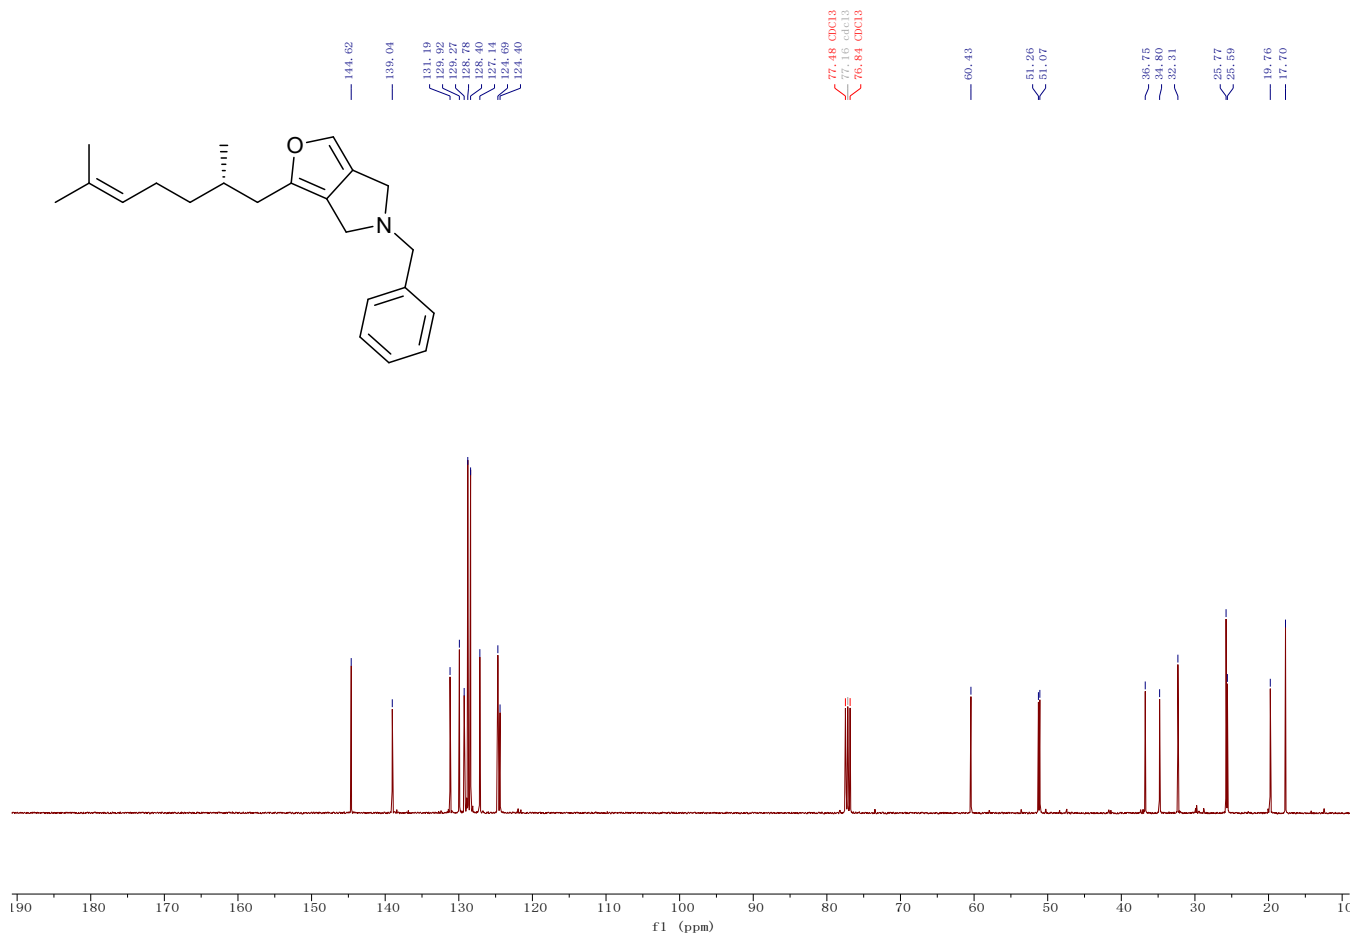





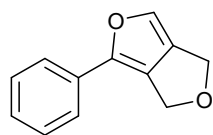

7.459  
7.456  
7.443  
7.441  
7.438  
7.435  
7.431  
7.427  
7.407  
7.398  
7.395  
7.393  
7.388  
7.375  
7.373  
7.371  
7.287  
7.283  
7.254  
7.249  
7.246  
7.244  
7.241  
7.231  
7.227  
7.153

5.023  
4.864

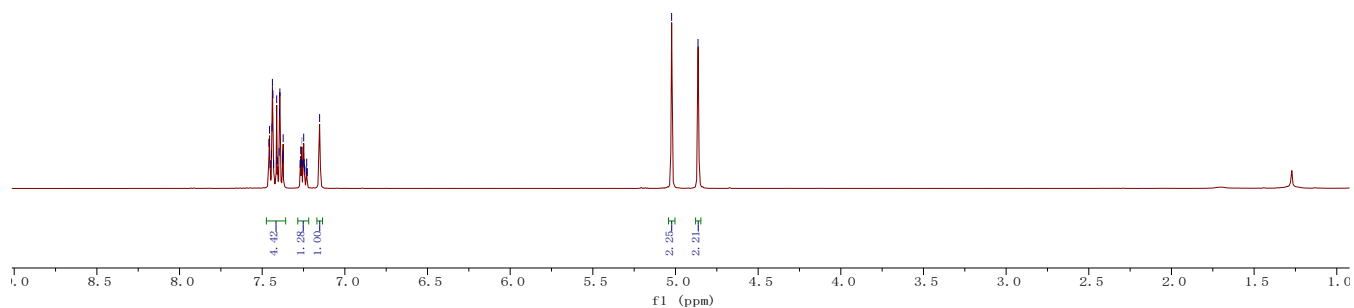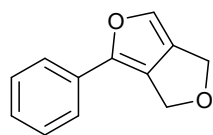

142.69  
132.48  
130.57  
128.62  
127.13  
126.62  
123.92

77.48 CDCl3  
77.16 CDCl3  
76.85 CDCl3

66.50  
65.53

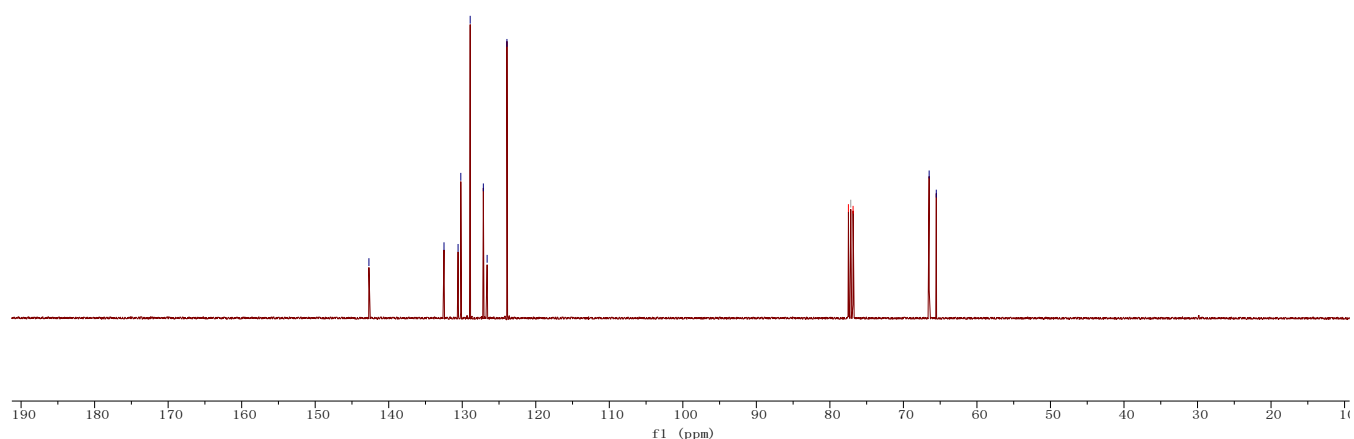

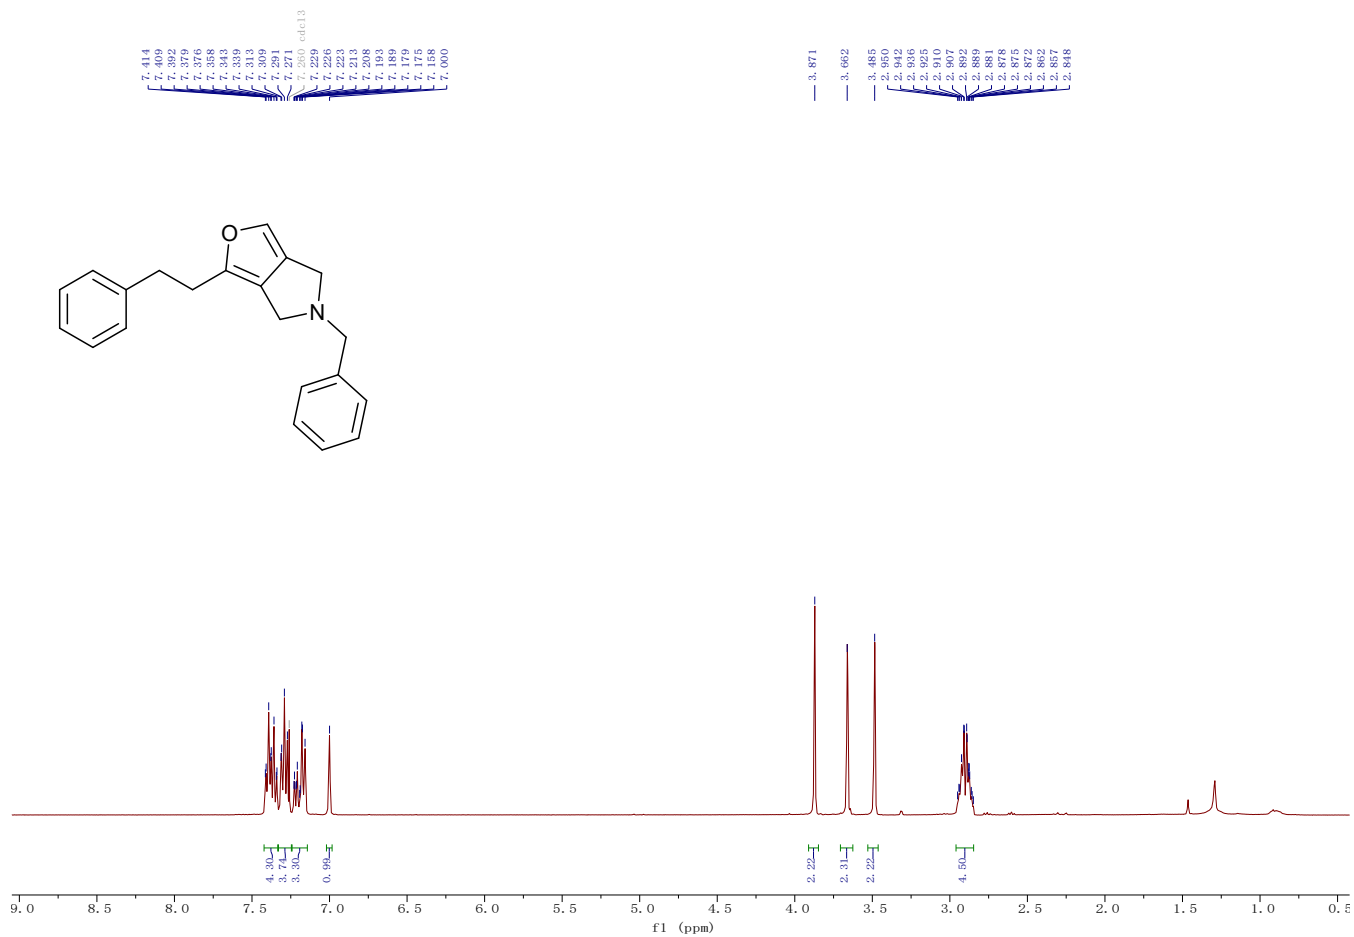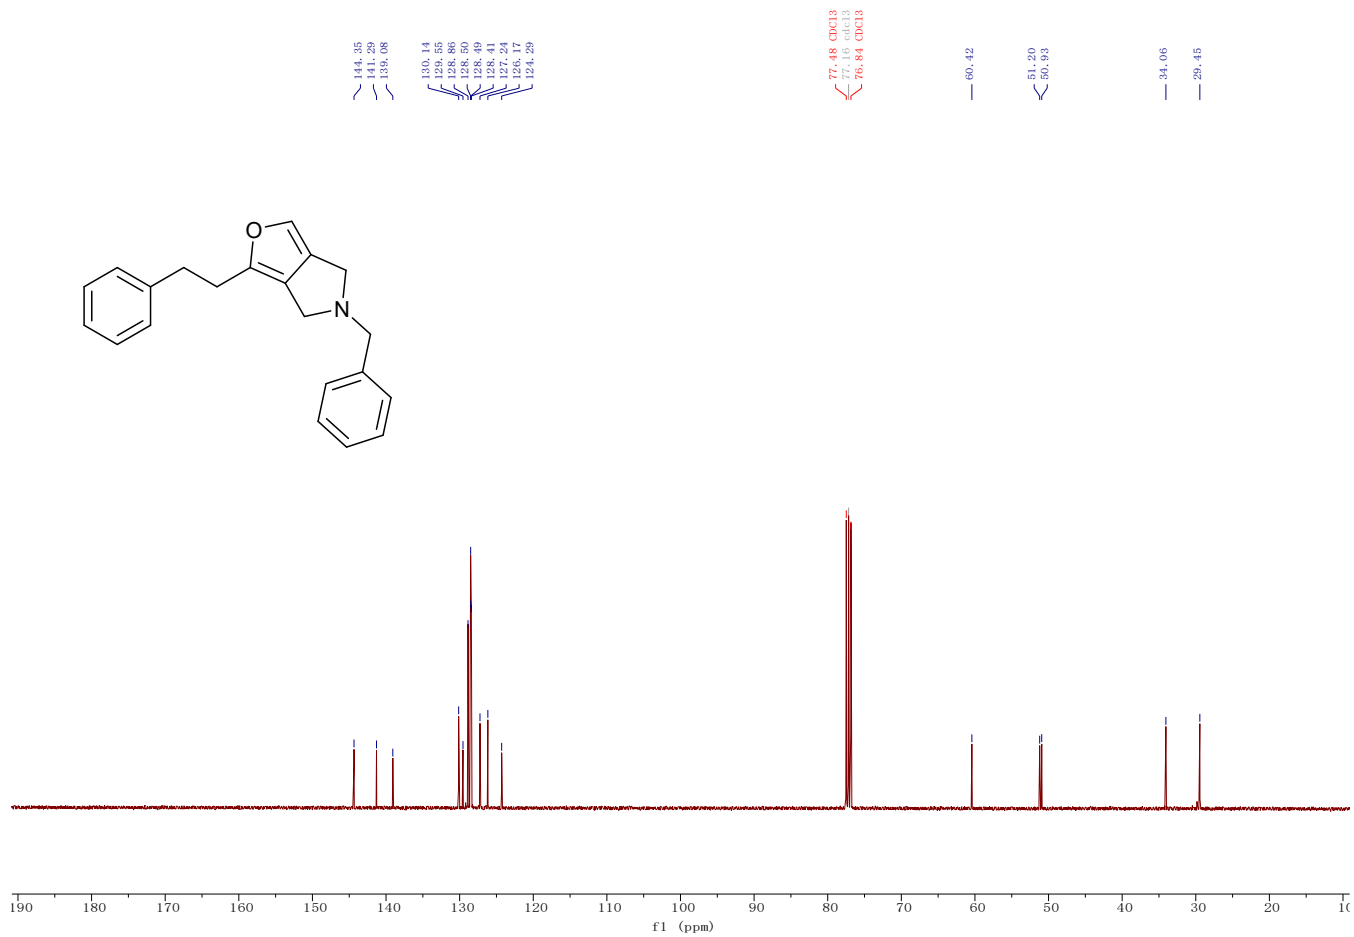

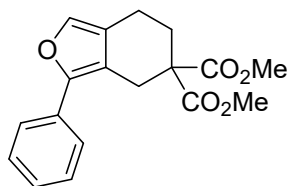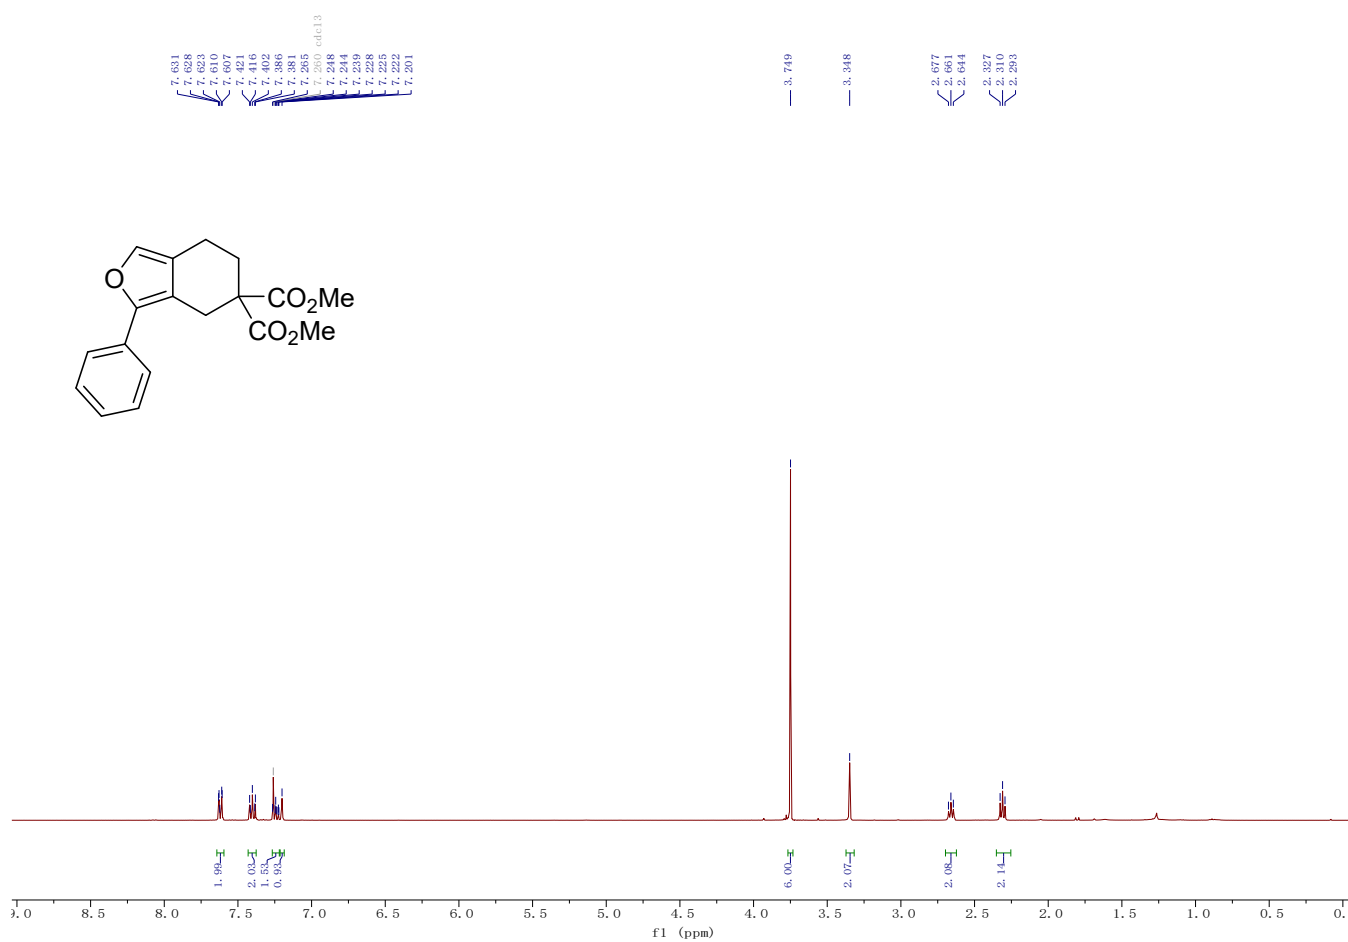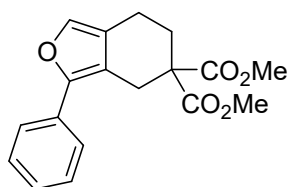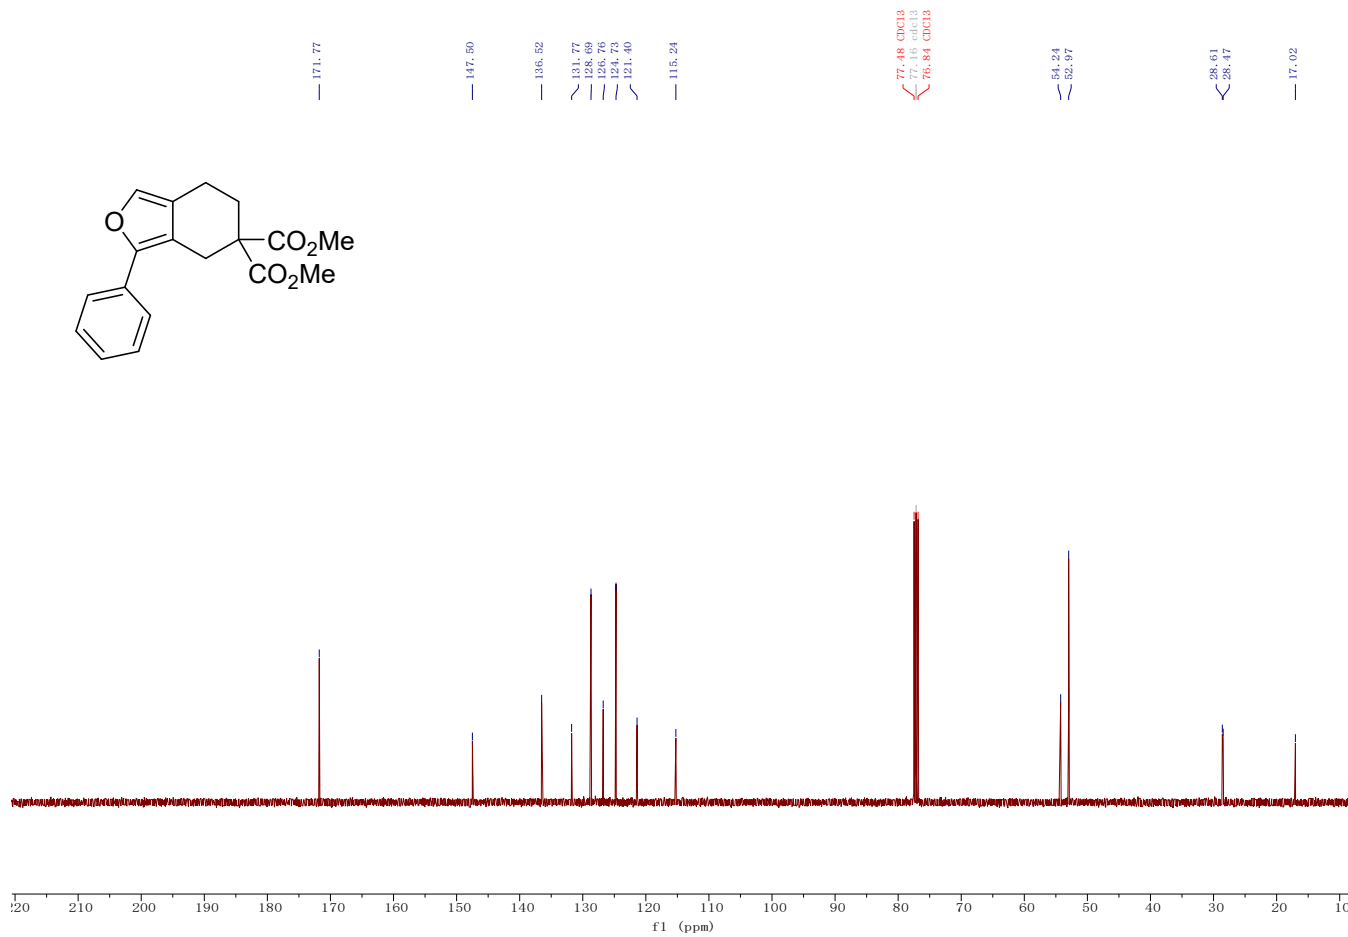

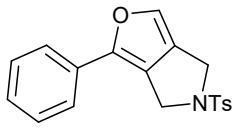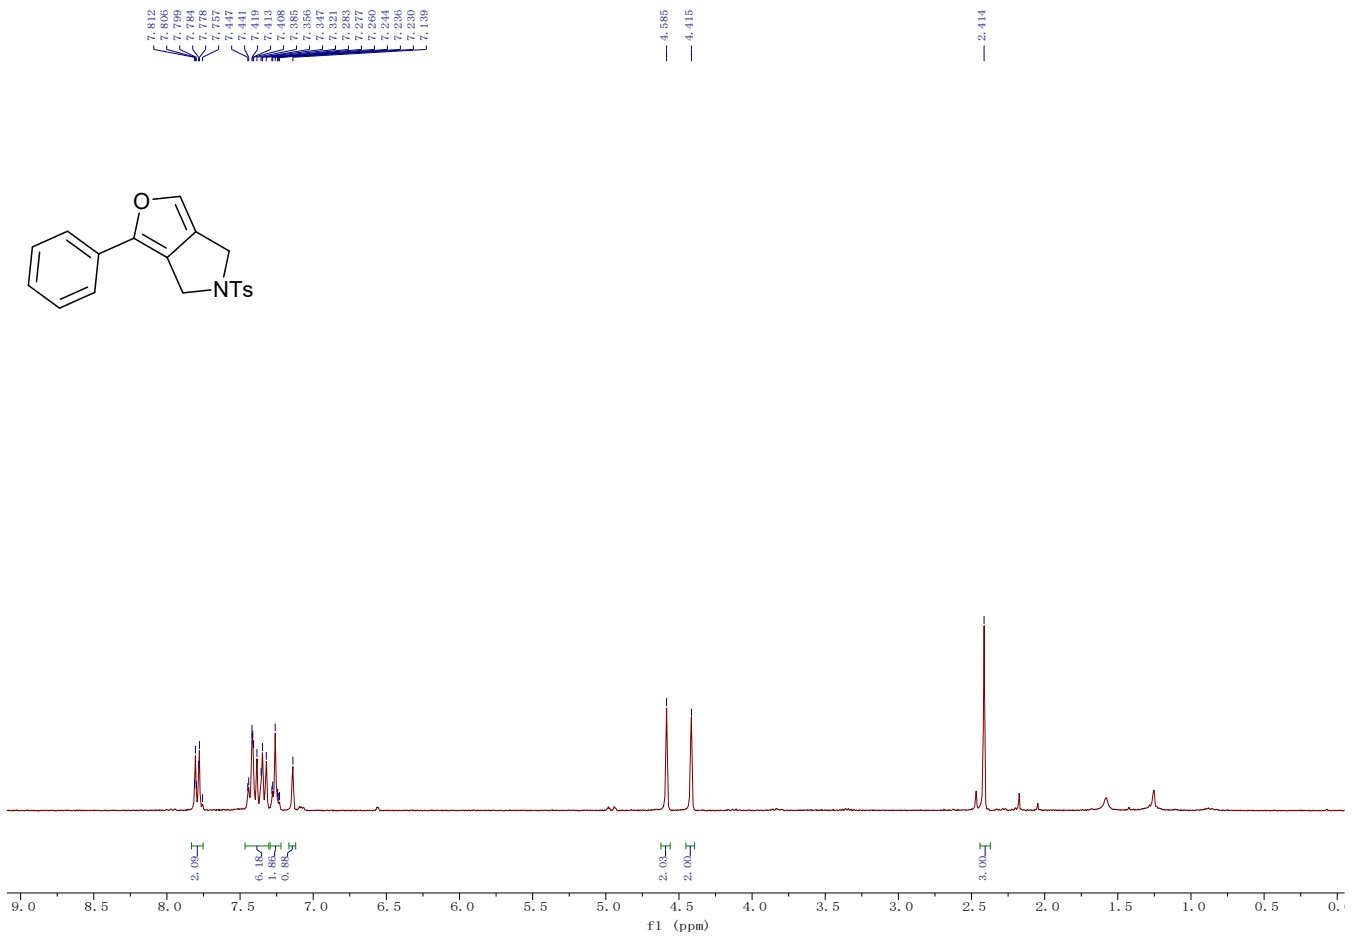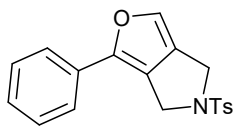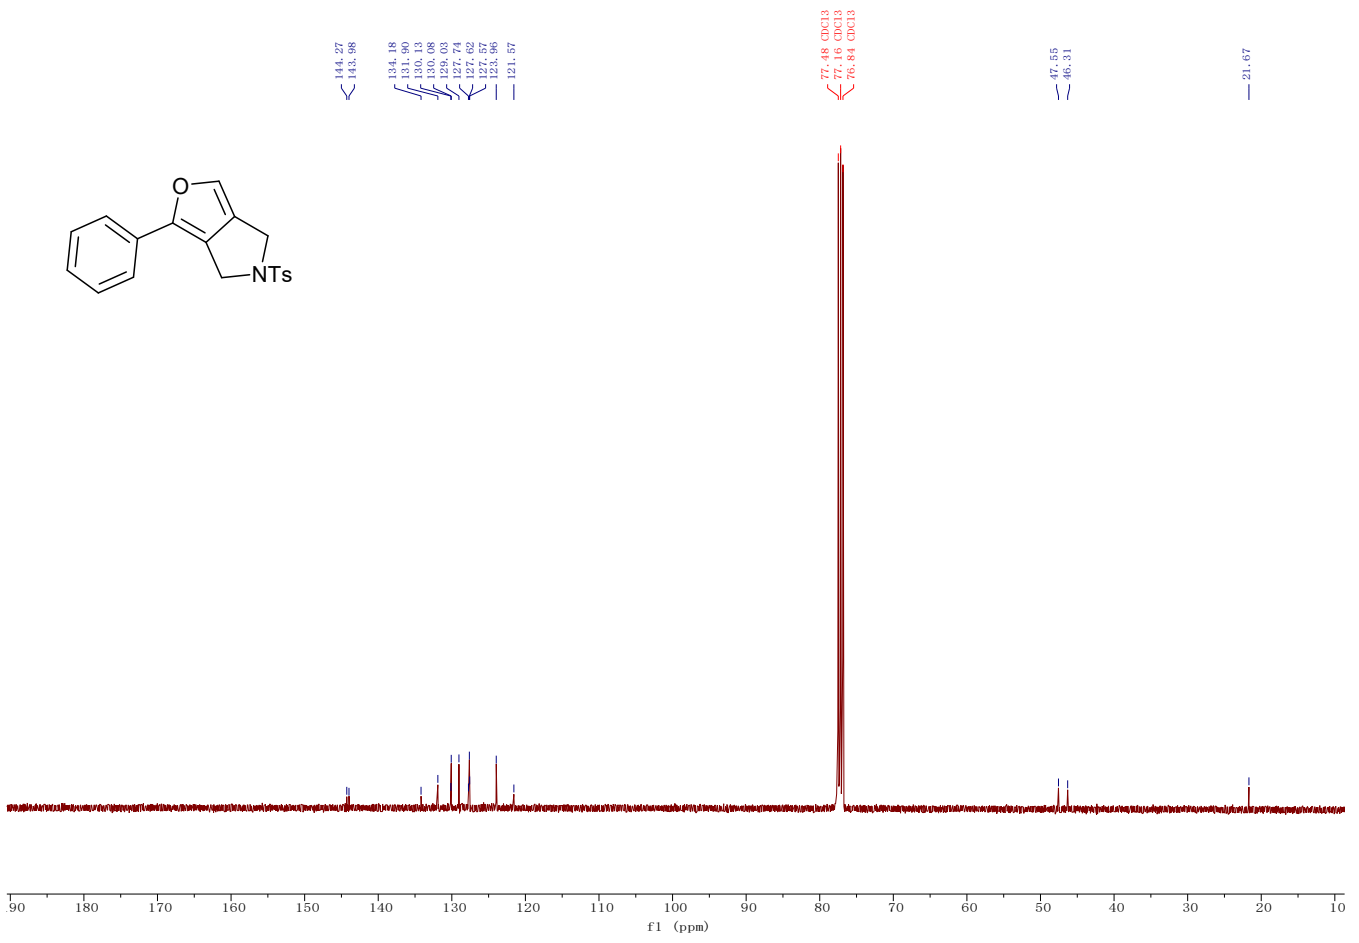

## 6. Single crystal X-Ray diffraction data

### Molecule 2a

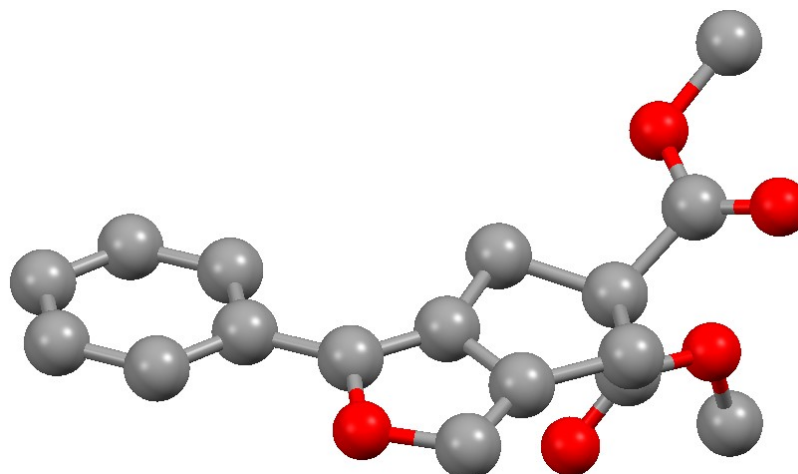

### checkCIF/PLATON report

You have not supplied any structure factors. As a result the full set of tests cannot be run.

THIS REPORT IS FOR GUIDANCE ONLY. IF USED AS PART OF A REVIEW PROCEDURE FOR PUBLICATION, IT SHOULD NOT REPLACE THE EXPERTISE OF AN EXPERIENCED CRYSTALLOGRAPHIC REFEREE.

No syntax errors found.    CIF dictionary    Interpreting this report

### Datablock: shelx

---

|                    |                                            |                    |                 |
|--------------------|--------------------------------------------|--------------------|-----------------|
| Bond precision:    | C-C = 0.0010 A                             | Wavelength=0.71073 |                 |
| Cell:              | a=8.4783(3)                                | b=9.2024(3)        | c=10.0482(3)    |
|                    | alpha=73.376(1)                            | beta=69.531(1)     | gamma=88.284(1) |
| Temperature:       | 296 K                                      |                    |                 |
|                    | Calculated                                 | Reported           |                 |
| Volume             | 701.62(4)                                  | 701.62(4)          |                 |
| Space group        | P -1                                       | P -1               |                 |
| Hall group         | -P 1                                       | -P 1               |                 |
| Moiety formula     | C17 H16 O5                                 | ?                  |                 |
| Sum formula        | C17 H16 O5                                 | C17 H16 O5         |                 |
| Mr                 | 300.30                                     | 300.30             |                 |
| Dx, g cm-3         | 1.421                                      | 1.421              |                 |
| Z                  | 2                                          | 2                  |                 |
| Mu (mm-1)          | 0.105                                      | 0.102              |                 |
| F000               | 316.0                                      | 316.0              |                 |
| F000'              | 316.18                                     |                    |                 |
| h, k, lmax         | 13, 14, 15                                 | 13, 14, 15         |                 |
| Nref               | 5629                                       | 5302               |                 |
| Tmin, Tmax         | 0.967, 0.975                               | 0.902, 0.947       |                 |
| Tmin'              | 0.962                                      |                    |                 |
| Correction method= | # Reported T Limits: Tmin=0.902 Tmax=0.947 |                    |                 |
| AbsCorr =          | MULTI-SCAN                                 |                    |                 |
| Data completeness= | 0.942                                      | Theta(max)= 33.755 |                 |
| R(reflections)=    | 0.0345( 4799)                              | wR2(reflections)=  |                 |
| S =                | 1.039                                      | 0.1030( 5302)      |                 |
| Npar=              | 201                                        |                    |                 |

---

The following ALERTS were generated. Each ALERT has the format  
**test-name\_ALERT\_alert-type\_alert-level.**  
Click on the hyperlinks for more details of the test.

---

**Alert level C**

ABSMU01\_ALERT\_1\_C The ratio of given/expected absorption coefficient lies  
outside the range 0.99 <> 1.01

Calculated value of mu = 0.105  
Value of mu given = 0.102

ABSTY02\_ALERT\_1\_C An \_exptl\_absorpt\_correction\_type has been given without  
a literature citation. This should be contained in the  
\_exptl\_absorpt\_process\_details field.  
Absorption correction given as multi-scan

---

**Alert level G**

PLAT154\_ALERT\_1\_G The s.u.'s on the Cell Angles are Equal ..(Note) 0.001 Degree  
PLAT398\_ALERT\_2\_G Deviating C-O-C Angle From 120 for O1 107.5 Degree  
PLAT883\_ALERT\_1\_G No Info/Value for \_atom\_sites\_solution\_primary . Please Do !  
PLAT941\_ALERT\_3\_G Average HKL Measurement Multiplicity ..... 3.2 Low

---

- 0 **ALERT level A** = Most likely a serious problem - resolve or explain  
0 **ALERT level B** = A potentially serious problem, consider carefully  
2 **ALERT level C** = Check. Ensure it is not caused by an omission or oversight  
4 **ALERT level G** = General information/check it is not something unexpected
- 4 ALERT type 1 CIF construction/syntax error, inconsistent or missing data  
1 ALERT type 2 Indicator that the structure model may be wrong or deficient  
1 ALERT type 3 Indicator that the structure quality may be low  
0 ALERT type 4 Improvement, methodology, query or suggestion  
0 ALERT type 5 Informative message, check
- 

It is advisable to attempt to resolve as many as possible of the alerts in all categories. Often the minor alerts point to easily fixed oversights, errors and omissions in your CIF or refinement strategy, so attention to these fine details can be worthwhile. In order to resolve some of the more serious problems it may be necessary to carry out additional measurements or structure refinements. However, the purpose of your study may justify the reported deviations and the more serious of these should normally be commented upon in the discussion or experimental section of a paper or in the "special\_details" fields of the CIF. checkCIF was carefully designed to identify outliers and unusual parameters, but every test has its limitations and alerts that are not important in a particular case may appear. Conversely, the absence of alerts does not guarantee there are no aspects of the results needing attention. It is up to the individual to critically assess their own results and, if necessary, seek expert advice.

#### Publication of your CIF in IUCr journals

A basic structural check has been run on your CIF. These basic checks will be run on all CIFs submitted for publication in IUCr journals (*Acta Crystallographica*, *Journal of Applied Crystallography*, *Journal of Synchrotron Radiation*); however, if you intend to submit to *Acta Crystallographica Section C* or *E* or *IUCrData*, you should make sure that **full publication checks** are run on the final version of your CIF prior to submission.

#### Publication of your CIF in other journals

Please refer to the *Notes for Authors* of the relevant journal for any special instructions relating to CIF submission.

---

PLATON version of 13/07/2021; check.def file version of 13/07/2021

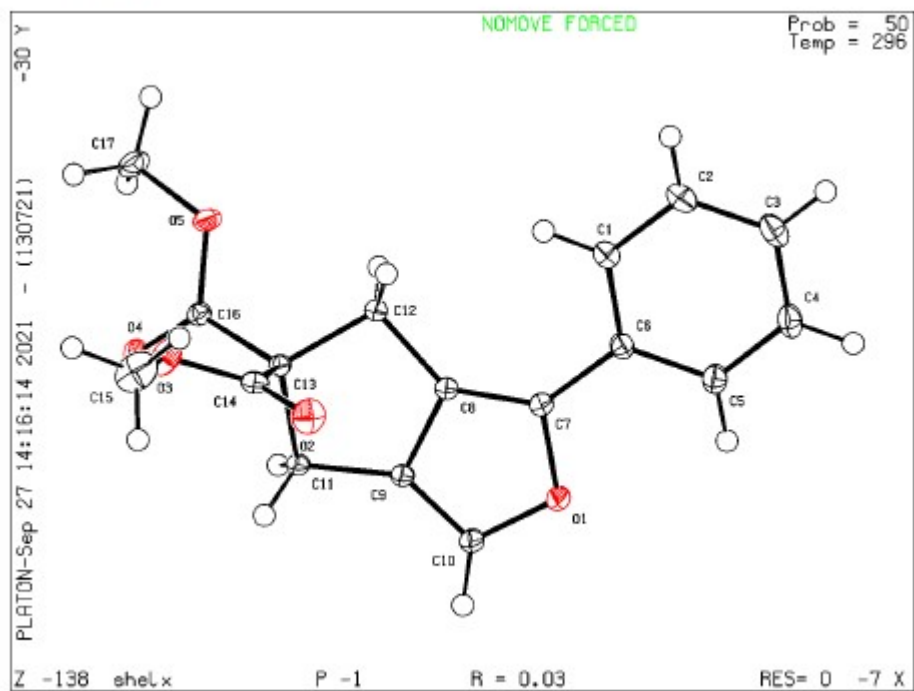





---

The following ALERTS were generated. Each ALERT has the format  
**test-name\_ALERT\_alert-type\_alert-level.**  
Click on the hyperlinks for more details of the test.

---

**Alert level C**

ABSMU01\_ALERT\_1\_C The ratio of given/expected absorption coefficient lies outside the range 0.99 <> 1.01  
Calculated value of mu = 0.626  
Value of mu given = 0.600

ABSTY02\_ALERT\_1\_C An \_exptl\_absorpt\_correction\_type has been given without a literature citation. This should be contained in the \_exptl\_absorpt\_process\_details field.  
Absorption correction given as multi-scan

THETM01\_ALERT\_3\_C The value of sine(theta\_max)/wavelength is less than 0.590  
Calculated sin(theta\_max)/wavelength = 0.5809

---

**Alert level G**

|                   |                                                  |              |
|-------------------|--------------------------------------------------|--------------|
| PLAT005_ALERT_5_G | No Embedded Refinement Details Found in the CIF  | Please Do !  |
| PLAT093_ALERT_1_G | No s.u.'s on H-positions, Refinement Reported as | mixed Check  |
| PLAT154_ALERT_1_G | The s.u.'s on the Cell Angles are Equal ..(Note) | 0.004 Degree |
| PLAT398_ALERT_2_G | Deviating C-O-C Angle From 120 for O1            | 107.6 Degree |
| PLAT999_ALERT_4_G | SHELXL97 is Deprecated and Succeeded by SHELXL/  | 2018 Note    |
| PLAT982_ALERT_1_G | The C-F' = 0.0192 Deviates from IT-value =       | 0.0181 Check |
| PLAT982_ALERT_1_G | The N-F' = 0.0330 Deviates from IT-value =       | 0.0311 Check |
| PLAT982_ALERT_1_G | The O-F' = 0.0517 Deviates from IT-value =       | 0.0492 Check |
| PLAT983_ALERT_1_G | The O-F* = 0.0336 Deviates from IT-Value =       | 0.0322 Check |

---

0 **ALERT level A** = Most likely a serious problem - resolve or explain  
0 **ALERT level B** = A potentially serious problem, consider carefully  
3 **ALERT level C** = Check. Ensure it is not caused by an omission or oversight  
9 **ALERT level G** = General information/check it is not something unexpected

8 ALERT type 1 CIF construction/syntax error, inconsistent or missing data  
1 ALERT type 2 Indicator that the structure model may be wrong or deficient  
1 ALERT type 3 Indicator that the structure quality may be low  
1 ALERT type 4 Improvement, methodology, query or suggestion  
1 ALERT type 5 Informative message, check

---

It is advisable to attempt to resolve as many as possible of the alerts in all categories. Often the minor alerts point to easily fixed oversights, errors and omissions in your CIF or refinement strategy, so attention to these fine details can be worthwhile. In order to resolve some of the more serious problems it may be necessary to carry out additional measurements or structure refinements. However, the purpose of your study may justify the reported deviations and the more serious of these should normally be commented upon in the discussion or experimental section of a paper or in the "special\_details" fields of the CIF. checkCIF was carefully designed to identify outliers and unusual parameters, but every test has its limitations and alerts that are not important in a particular case may appear. Conversely, the absence of alerts does not guarantee there are no aspects of the results needing attention. It is up to the individual to critically assess their own results and, if necessary, seek expert advice.

#### Publication of your CIF in IUCr journals

A basic structural check has been run on your CIF. These basic checks will be run on all CIFs submitted for publication in IUCr journals (*Acta Crystallographica*, *Journal of Applied Crystallography*, *Journal of Synchrotron Radiation*); however, if you intend to submit to *Acta Crystallographica Section C* or *E* or *IUCrData*, you should make sure that **full publication checks** are run on the final version of your CIF prior to submission.

#### Publication of your CIF in other journals

Please refer to the *Notes for Authors* of the relevant journal for any special instructions relating to CIF submission.

---

PLATON version of 13/07/2021; check.def file version of 13/07/2021

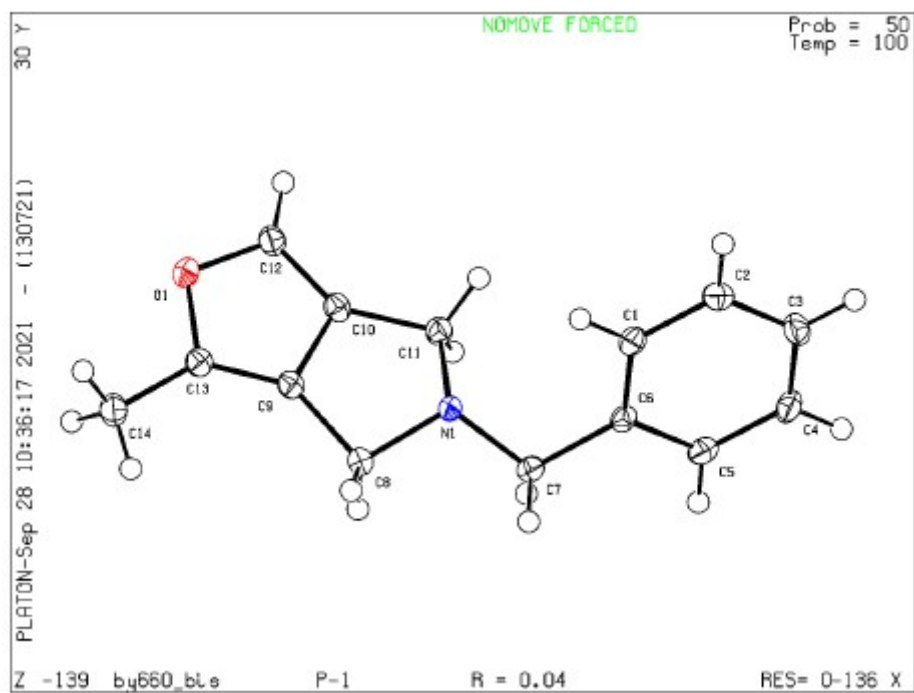

Supplement: d1cc06379k1.pdf [file d1cc06379k1.pdf]
